# Supplementary material for: Radiation‑Induced Microglial Turnover Elicits a cGAS‑Mediated Interferon Response
Source: Research Square preprint supplement (doi:10.21203/rs.3.rs-8775672/v1), 2026-02-11
Supplement: Supplementary file 1 [file 43505a254a350581268d0851.xlsx]

## Sheet: 2 wk all cell type
gene	p_val	avg_log2FC	pct.1	pct.2	p_val_adj	cluster
Glrp1	0	5.68233132098221	0.093	0.002	0	Microglia
Ccr5	0	5.58430142288503	0.734	0.028	0	Microglia
Nlrp1b	0	5.58355798237623	0.094	0.002	0	Microglia
Gm30329	0	5.54057513276073	0.092	0.003	0	Microglia
Gpr165	0	5.47641794712248	0.09	0.003	0	Microglia
Gpr84	0	5.45175916424095	0.317	0.009	0	Microglia
Adora3	0	5.43294759551914	0.292	0.008	0	Microglia
4933406I18Rik	0	5.38204565838975	0.117	0.004	0	Microglia
Rhoh	0	5.35959297958115	0.579	0.02	0	Microglia
Gpr34	0	5.30444917624383	0.935	0.064	0	Microglia
Rgs1	0	5.29973406938003	0.207	0.007	0	Microglia
Susd3	0	5.29699227585151	0.577	0.021	0	Microglia
Siglecf	0	5.27596635006772	0.078	0.002	0	Microglia
Cx3cr1	0	5.25308418750803	0.969	0.129	0	Microglia
Gm26520	0	5.24627957727239	0.101	0.003	0	Microglia
Tmem119	0	5.24113945227302	0.901	0.053	0	Microglia
Cd180	0	5.24061932064345	0.457	0.016	0	Microglia
Siglech	0	5.23241808210877	0.927	0.057	0	Microglia
P2ry12	0	5.1919401499711	0.964	0.108	0	Microglia
Slc2a5	0	5.18502063967051	0.603	0.023	0	Microglia
Spint1	0	5.17774692202063	0.224	0.007	0	Microglia
Selplg	0	5.14320450333103	0.948	0.074	0	Microglia
Mafb	0	5.14316768862787	0.829	0.054	0	Microglia
Havcr2	0	5.14220326623112	0.469	0.016	0	Microglia
P2ry13	0	5.13905285168243	0.802	0.038	0	Microglia
Gna15	0	5.11686944807637	0.495	0.019	0	Microglia
Il1a	0	5.11451523242242	0.149	0.005	0	Microglia
Upk1b	0	5.10190215402621	0.123	0.004	0	Microglia
Gm13479	0	5.10152872940039	0.051	0.002	0	Microglia
Il7r	0	5.09988502934296	0.218	0.007	0	Microglia
Olfml3	0	5.09813220757974	0.938	0.069	0	Microglia
Slc15a3	0	5.07263979953403	0.432	0.018	0	Microglia
Hspb3	0	5.07109990045703	0.126	0.004	0	Microglia
Liph	0	5.06240228214671	0.113	0.003	0	Microglia
Ikzf1	0	5.04569481128053	0.545	0.022	0	Microglia
I830077J02Rik	0	5.02554018115877	0.215	0.008	0	Microglia
Ccl4	0	5.02359585617892	0.072	0.006	0	Microglia
Gm44067	0	5.02013792148427	0.055	0.002	0	Microglia
Rab39	0	5.01028163896488	0.148	0.006	0	Microglia
Gpr183	0	5.01019506224016	0.522	0.021	0	Microglia
Apbb1ip	0	5.00833881235518	0.791	0.051	0	Microglia
Lair1	0	4.99846093361258	0.808	0.049	0	Microglia
Irf8	0	4.96261987471219	0.716	0.034	0	Microglia
Tagap	0	4.95782381183999	0.184	0.007	0	Microglia
Lrrc39	0	4.92236439059764	0.07	0.002	0	Microglia
Hpgds	0	4.92195727052014	0.815	0.043	0	Microglia
Lrrc3	0	4.91649466082814	0.311	0.012	0	Microglia
Hexb	0	4.90287057784915	0.993	0.252	0	Microglia
Tifab	0	4.90098737111902	0.301	0.012	0	Microglia
Lpcat2	0	4.89312542671971	0.862	0.061	0	Microglia
Hk2	0	4.88753258315463	0.505	0.023	0	Microglia
8030442B05Rik	0	4.87175252331756	0.05	0.002	0	Microglia
Card9	0	4.85976238931218	0.071	0.002	0	Microglia
Tlr13	0	4.85956133267264	0.266	0.01	0	Microglia
P2ry6	0	4.85481370297789	0.55	0.024	0	Microglia
Cd84	0	4.83995329250527	0.608	0.027	0	Microglia
Fgd2	0	4.83823214673817	0.486	0.021	0	Microglia
Il10ra	0	4.82122452807247	0.464	0.019	0	Microglia
Ncf1	0	4.81856006655008	0.545	0.024	0	Microglia
Tmem173	0	4.81161033277651	0.607	0.032	0	Microglia
A830008E24Rik	0	4.80966536739556	0.181	0.008	0	Microglia
C5ar2	0	4.80537844593839	0.199	0.008	0	Microglia
Kcnk6	0	4.80399160411635	0.373	0.018	0	Microglia
Il21r	0	4.80122510489124	0.324	0.012	0	Microglia
Cd33	0	4.78508818882948	0.667	0.033	0	Microglia
Ccl9	0	4.77219998126387	0.365	0.017	0	Microglia
Arl11	0	4.77122435835697	0.133	0.005	0	Microglia
Fam105a	0	4.770843273599	0.663	0.034	0	Microglia
Csf1r	0	4.7576552061142	0.971	0.106	0	Microglia
Abcc3	0	4.75758840203087	0.234	0.01	0	Microglia
Rasal3	0	4.75450678156292	0.28	0.011	0	Microglia
Fcgr1	0	4.75195008544898	0.664	0.031	0	Microglia
Cass4	0	4.74984955304379	0.071	0.003	0	Microglia
Rgs2	0	4.74962273034793	0.76	0.049	0	Microglia
Myo18b	0	4.74311824292005	0.087	0.003	0	Microglia
Trem2	0	4.74200698413809	0.957	0.092	0	Microglia
Cysltr1	0	4.73238132044431	0.312	0.015	0	Microglia
Blnk	0	4.73146622229702	0.379	0.016	0	Microglia
Cd86	0	4.72849812798183	0.507	0.022	0	Microglia
Tlr7	0	4.72524947745787	0.426	0.018	0	Microglia
Nlrp3	0	4.72486069242749	0.199	0.008	0	Microglia
Mpeg1	0	4.7192907372043	0.826	0.048	0	Microglia
Pde3b	0	4.71808219580034	0.686	0.041	0	Microglia
Plcb2	0	4.70508322286956	0.118	0.005	0	Microglia
Ly86	0	4.70398684018484	0.954	0.081	0	Microglia
Cd14	0	4.70262935349037	0.462	0.021	0	Microglia
Arhgap22	0	4.70152197703957	0.128	0.005	0	Microglia
Vav1	0	4.70087075877828	0.343	0.014	0	Microglia
Fcrls	0	4.70055432580311	0.964	0.097	0	Microglia
Kcnk12	0	4.69889836771478	0.131	0.005	0	Microglia
Tgfbr1	0	4.69849754335677	0.903	0.113	0	Microglia
Pld4	0	4.69711614832126	0.731	0.04	0	Microglia
Rubcnl	0	4.6943371508846	0.127	0.005	0	Microglia
Laptm5	0	4.69312332072062	0.977	0.107	0	Microglia
Pik3ap1	0	4.68870632273148	0.107	0.005	0	Microglia
Runx1	0	4.6864112742886	0.43	0.022	0	Microglia
Itgam	0	4.66957492659182	0.795	0.048	0	Microglia
Cyth4	0	4.66223548559755	0.791	0.049	0	Microglia
Abi3	0	4.64825085924705	0.578	0.032	0	Microglia
Cd37	0	4.63827805952806	0.652	0.033	0	Microglia
Lag3	0	4.6357785920215	0.337	0.014	0	Microglia
Tpbgl	0	4.63232634709364	0.159	0.007	0	Microglia
Arhgap45	0	4.62344122381801	0.497	0.023	0	Microglia
Bcl2a1b	0	4.61915985134908	0.366	0.015	0	Microglia
1810011H11Rik	0	4.61741889892453	0.192	0.007	0	Microglia
BC035044	0	4.61265346868985	0.262	0.01	0	Microglia
Ptgs1	0	4.61259365317303	0.784	0.056	0	Microglia
Naip2	0	4.60402233853372	0.181	0.009	0	Microglia
Tnfrsf13b	0	4.60396014648441	0.29	0.012	0	Microglia
Mdfi	0	4.60338564462066	0.05	0.002	0	Microglia
Bcl2a1a	0	4.60250280590363	0.087	0.003	0	Microglia
Tnfaip8l2	0	4.60198593813894	0.537	0.026	0	Microglia
Tbxas1	0	4.59913935863859	0.486	0.023	0	Microglia
Batf3	0	4.59406762147816	0.104	0.005	0	Microglia
Fcrl1	0	4.59099880789378	0.094	0.003	0	Microglia
Cd53	0	4.57923033671699	0.797	0.048	0	Microglia
C1qa	0	4.57217846246289	0.995	0.173	0	Microglia
Nectin4	0	4.56864393687401	0.105	0.004	0	Microglia
Ctss	0	4.56448782642159	0.991	0.156	0	Microglia
Csf2rb2	0	4.56409038659722	0.077	0.003	0	Microglia
Pik3cg	0	4.56368192307431	0.407	0.02	0	Microglia
Hvcn1	0	4.54868123836353	0.238	0.01	0	Microglia
Btk	0	4.5479985113006	0.249	0.011	0	Microglia
Rbm47	0	4.54505525981226	0.175	0.008	0	Microglia
Slco4a1	0	4.54309010177282	0.068	0.002	0	Microglia
C1qc	0	4.54047757943364	0.993	0.158	0	Microglia
Nckap1l	0	4.5308354207085	0.574	0.029	0	Microglia
A630001G21Rik	0	4.52972342387423	0.202	0.01	0	Microglia
Gp9	0	4.52877818580915	0.151	0.005	0	Microglia
C3ar1	0	4.52871248246832	0.387	0.018	0	Microglia
Capn3	0	4.52520457129074	0.249	0.01	0	Microglia
Abhd15	0	4.52500181781714	0.069	0.003	0	Microglia
Fyb	0	4.52441452738538	0.654	0.034	0	Microglia
Bin2	0	4.52124094408882	0.609	0.032	0	Microglia
Ccl3	0	4.5212347606817	0.077	0.007	0	Microglia
Gcnt1	0	4.51677869562638	0.438	0.022	0	Microglia
Slc7a8	0	4.51647733604129	0.573	0.033	0	Microglia
Naip6	0	4.51277275318857	0.075	0.003	0	Microglia
Slamf6	0	4.50383096856547	0.077	0.003	0	Microglia
Csf3r	0	4.50269727819411	0.421	0.017	0	Microglia
Inpp5d	0	4.50170462965756	0.724	0.058	0	Microglia
Snx20	0	4.49328951448351	0.337	0.017	0	Microglia
Ptafr	0	4.48065150910083	0.309	0.015	0	Microglia
Sla	0	4.47993810581134	0.371	0.018	0	Microglia
Fcgr3	0	4.46789438372961	0.858	0.058	0	Microglia
Clec5a	0	4.46449817968296	0.256	0.011	0	Microglia
Lcp2	0	4.46390411673201	0.385	0.02	0	Microglia
Ticam2	0	4.46366222677201	0.067	0.003	0	Microglia
Slc11a1	0	4.46088050755638	0.273	0.015	0	Microglia
Csf2rb	0	4.45670720078938	0.167	0.008	0	Microglia
Il16	0	4.45574955147026	0.287	0.014	0	Microglia
Nfam1	0	4.44871652810737	0.394	0.02	0	Microglia
C1qb	0	4.44833736780625	0.996	0.193	0	Microglia
Ppp1r3b	0	4.44488228749534	0.142	0.007	0	Microglia
Pou2f2	0	4.44453900123073	0.66	0.039	0	Microglia
Vsir	0	4.44316013249327	0.888	0.105	0	Microglia
Hck	0	4.43961806350382	0.367	0.017	0	Microglia
Cd300c2	0	4.4312610064371	0.681	0.039	0	Microglia
Siglece	0	4.43115681481525	0.201	0.009	0	Microglia
Dock2	0	4.43013550914366	0.464	0.024	0	Microglia
Psd4	0	4.4232055547767	0.083	0.004	0	Microglia
Arhgap4	0	4.41874154513883	0.231	0.011	0	Microglia
Fam46c	0	4.41657079757273	0.237	0.013	0	Microglia
Slfn8	0	4.4098267254177	0.232	0.012	0	Microglia
Tlr6	0	4.40863895188566	0.071	0.004	0	Microglia
Sash3	0	4.4059971980104	0.191	0.009	0	Microglia
Dock8	0	4.39945294816429	0.431	0.025	0	Microglia
Gsg1	0	4.39314487473917	0.066	0.002	0	Microglia
Gm31243	0	4.38873517351965	0.091	0.004	0	Microglia
Tlr2	0	4.38733932151963	0.203	0.011	0	Microglia
Tnfrsf17	0	4.38257251141366	0.125	0.006	0	Microglia
Parvg	0	4.36374435712717	0.268	0.013	0	Microglia
Elf4	0	4.36298002950151	0.13	0.007	0	Microglia
Fermt3	0	4.36030818015403	0.452	0.025	0	Microglia
Galnt12	0	4.35476928482191	0.171	0.008	0	Microglia
Adcy7	0	4.3486908683205	0.235	0.012	0	Microglia
Slc16a6	0	4.34438753432377	0.427	0.031	0	Microglia
Traf3ip3	0	4.34193304465462	0.237	0.012	0	Microglia
Gm32849	0	4.33885970513056	0.122	0.006	0	Microglia
Was	0	4.33861868020921	0.244	0.013	0	Microglia
Itgb2	0	4.33202872203374	0.473	0.024	0	Microglia
Mlxipl	0	4.33137259379572	0.273	0.014	0	Microglia
H2-Oa	0	4.32948921433387	0.122	0.006	0	Microglia
Cd300a	0	4.32830887632636	0.349	0.018	0	Microglia
Ccdc88b	0	4.32829627855217	0.162	0.008	0	Microglia
H2-DMb1	0	4.32586750211045	0.273	0.012	0	Microglia
Lat2	0	4.32144107415202	0.258	0.014	0	Microglia
Hpgd	0	4.31928600508652	0.711	0.042	0	Microglia
Unc93b1	0	4.31758546861059	0.854	0.097	0	Microglia
Adrb2	0	4.31164139111599	0.429	0.032	0	Microglia
Spi1	0	4.31049719134835	0.629	0.034	0	Microglia
Crybb1	0	4.30532519457836	0.595	0.037	0	Microglia
Abca9	0	4.30299553494611	0.626	0.038	0	Microglia
Neurl3	0	4.30072326137087	0.153	0.008	0	Microglia
Tlr1	0	4.29752436711885	0.084	0.004	0	Microglia
Slamf9	0	4.29105228658817	0.148	0.006	0	Microglia
Bank1	0	4.28987492976046	0.242	0.012	0	Microglia
Gm46224	0	4.2860120400345	0.072	0.003	0	Microglia
Rab20	0	4.28519701741209	0.13	0.007	0	Microglia
Ltc4s	0	4.28189969467956	0.755	0.057	0	Microglia
Gm26740	0	4.2725031090573	0.143	0.008	0	Microglia
Pon3	0	4.2722457732724	0.26	0.015	0	Microglia
Fam167b	0	4.2708861230532	0.144	0.006	0	Microglia
Alox5ap	0	4.26580642818291	0.619	0.036	0	Microglia
Cd68	0	4.26037885716281	0.75	0.05	0	Microglia
Aif1	0	4.25173229108122	0.88	0.07	0	Microglia
5430427O19Rik	0	4.25087926717683	0.123	0.006	0	Microglia
Dennd1c	0	4.24990570776795	0.123	0.007	0	Microglia
Cmtm7	0	4.24091984930941	0.603	0.047	0	Microglia
Rassf5	0	4.24006548447167	0.221	0.012	0	Microglia
Pycard	0	4.23872047666335	0.68	0.056	0	Microglia
Gm42031	0	4.22589375490802	0.072	0.004	0	Microglia
Myo1f	0	4.22466887165983	0.262	0.014	0	Microglia
Arhgap30	0	4.22122797659157	0.393	0.022	0	Microglia
Plek	0	4.21421866031293	0.542	0.034	0	Microglia
Lgmn	0	4.2134815175286	0.978	0.292	0	Microglia
Plcl2	0	4.20075207172322	0.368	0.021	0	Microglia
Nav3	0	4.19589140721255	0.56	0.043	0	Microglia
Rab3il1	0	4.19309360402695	0.484	0.032	0	Microglia
Lpxn	0	4.18976861994724	0.191	0.01	0	Microglia
Ptpn6	0	4.18672068287056	0.415	0.022	0	Microglia
Pik3r5	0	4.18575782221226	0.133	0.007	0	Microglia
Samsn1	0	4.17003435881768	0.46	0.035	0	Microglia
Gm5086	0	4.16714728765689	0.134	0.007	0	Microglia
Lrrc25	0	4.16197261635793	0.212	0.011	0	Microglia
Maf	0	4.161210875635	0.857	0.072	0	Microglia
Hk3	0	4.16105040270962	0.128	0.006	0	Microglia
Hist1h2ap	9.70940513588403e-283	4.13884981757252	0.063	0.009	1.93207452798956e-278	Microglia
Cryba4	0	4.13388252003572	0.25	0.012	0	Microglia
Glipr1	0	4.11364898249611	0.111	0.006	0	Microglia
Slc7a7	0	4.0997021496883	0.254	0.017	0	Microglia
Slc37a2	0	4.09639553252642	0.198	0.012	0	Microglia
Ccl12	0	4.09623537364181	0.297	0.02	0	Microglia
Themis2	0	4.09030775130943	0.13	0.007	0	Microglia
Atp8a2	0	4.08947669164693	0.243	0.016	0	Microglia
Rtn4rl1	0	4.08875842536154	0.362	0.026	0	Microglia
H2-DMa	0	4.08787290768058	0.422	0.024	0	Microglia
Itgb3	0	4.06794698358214	0.093	0.009	0	Microglia
Wdfy4	0	4.06261929502167	0.13	0.007	0	Microglia
Pla2g15	0	4.05683127414398	0.476	0.038	0	Microglia
Rgs10	0	4.05488923730044	0.934	0.112	0	Microglia
Cebpa	0	4.05427168983909	0.364	0.024	0	Microglia
Ccl6	0	4.05055412534482	0.322	0.017	0	Microglia
Fam102b	0	4.04781306920546	0.643	0.067	0	Microglia
Plcg2	0	4.04562315888683	0.241	0.019	0	Microglia
Cmklr1	0	4.02332127222659	0.19	0.013	0	Microglia
Gm26778	0	4.02273117221143	0.205	0.016	0	Microglia
Fcer1g	0	4.00288780310298	0.967	0.111	0	Microglia
Adgre1	0	4.00002073972938	0.474	0.027	0	Microglia
Ctsd	0	3.99662645733105	0.99	0.454	0	Microglia
Rnase4	0	3.9954228998804	0.851	0.106	0	Microglia
Tnfrsf11a	0	3.98649485080232	0.225	0.018	0	Microglia
Ang	0	3.98572632765445	0.476	0.038	0	Microglia
Lrmp	0	3.98437331975236	0.134	0.008	0	Microglia
Haspin	0	3.98202027040901	0.068	0.005	0	Microglia
1700017B05Rik	0	3.97008316009618	0.469	0.039	0	Microglia
Irf5	0	3.96413445425027	0.358	0.028	0	Microglia
Ptprc	0	3.96117558508349	0.669	0.035	0	Microglia
Sall1	0	3.95057579607569	0.657	0.088	0	Microglia
Pag1	0	3.94380211074391	0.693	0.087	0	Microglia
Fcgr2b	0	3.93898316506537	0.495	0.028	0	Microglia
Golm1	0	3.93625459533788	0.814	0.118	0	Microglia
Gmip	0	3.9359367782682	0.288	0.021	0	Microglia
Rasa4	0	3.93188142071102	0.187	0.012	0	Microglia
Plxna4os1	0	3.93176224685111	0.143	0.01	0	Microglia
Clec4a2	0	3.93097201624555	0.293	0.017	0	Microglia
Hcls1	0	3.91005009969251	0.389	0.026	0	Microglia
Ms4a6d	0	3.9053724734108	0.282	0.016	0	Microglia
Gm15655	0	3.89911408020038	0.071	0.004	0	Microglia
Tyrobp	0	3.89239281896447	0.973	0.129	0	Microglia
Milr1	0	3.89188218603328	0.101	0.008	0	Microglia
2610528A11Rik	0	3.8882909550435	0.073	0.003	0	Microglia
Il6ra	0	3.88743941091434	0.585	0.061	0	Microglia
Syk	0	3.883249816836	0.293	0.019	0	Microglia
Ebi3	0	3.8776506926447	0.112	0.007	0	Microglia
Trim14	0	3.87748553193985	0.064	0.006	0	Microglia
Sh2b2	0	3.86722450651567	0.114	0.009	0	Microglia
Whrn	0	3.85643092412601	0.181	0.014	0	Microglia
Tnni2	0	3.85639928680027	0.067	0.003	0	Microglia
Aim2	0	3.84300834160984	0.279	0.024	0	Microglia
Ncf4	0	3.8271856502391	0.166	0.011	0	Microglia
Lbx2	0	3.82542372515056	0.058	0.005	0	Microglia
Alox5	0	3.81036392647857	0.08	0.005	0	Microglia
Bid	0	3.80888973991943	0.12	0.009	0	Microglia
Clcf1	0	3.80705339331662	0.067	0.004	0	Microglia
Chst7	0	3.80526704346895	0.214	0.017	0	Microglia
Mgat4a	0	3.79920605161081	0.524	0.057	0	Microglia
Ppfia4	0	3.79568266489479	0.439	0.031	0	Microglia
Tnfrsf1b	0	3.79290378762854	0.314	0.028	0	Microglia
Gal3st4	0	3.78885304386008	0.062	0.003	0	Microglia
Naip5	0	3.78084199272955	0.089	0.006	0	Microglia
Casp1	0	3.77734535112465	0.127	0.008	0	Microglia
Igsf6	0	3.77158776427759	0.133	0.009	0	Microglia
Rapsn	0	3.77025569579054	0.08	0.006	0	Microglia
Cd48	0	3.76746463031087	0.235	0.016	0	Microglia
Frrs1	0	3.76721564184755	0.23	0.022	0	Microglia
Il1rl2	0	3.76307012393127	0.056	0.003	0	Microglia
Zfhx3	0	3.75893563100442	0.836	0.129	0	Microglia
Hist1h1d	0	3.75738387656635	0.096	0.011	0	Microglia
Phf11b	0	3.75193802215881	0.077	0.006	0	Microglia
Tlr4	0	3.7496484287457	0.208	0.017	0	Microglia
0610040J01Rik	0	3.74728947012407	0.24	0.02	0	Microglia
Gm40841	0	3.74042156684377	0.093	0.007	0	Microglia
Lacc1	0	3.73746966228603	0.362	0.031	0	Microglia
Zfp992	0	3.73191436193387	0.127	0.011	0	Microglia
Ncf2	0	3.7199183446595	0.438	0.037	0	Microglia
Arl4c	0	3.71847920076968	0.503	0.051	0	Microglia
Nfatc2	0	3.71670021645189	0.151	0.011	0	Microglia
Gm32036	0	3.71600133164364	0.087	0.011	0	Microglia
Arhgap9	0	3.6970302533255	0.096	0.006	0	Microglia
Lcp1	0	3.69361314487435	0.705	0.086	0	Microglia
March1	0	3.69330904454125	0.489	0.059	0	Microglia
Mylip	0	3.69328574674129	0.622	0.073	0	Microglia
Trpm2	0	3.69321666089701	0.16	0.009	0	Microglia
Gm37233	0	3.68991697890633	0.104	0.008	0	Microglia
Coro1a	0	3.68128451582269	0.624	0.044	0	Microglia
Mb21d1	0	3.68049043358801	0.129	0.012	0	Microglia
Clec4a3	0	3.67788089684761	0.255	0.016	0	Microglia
Pilra	0	3.67358150552862	0.114	0.006	0	Microglia
C5ar1	0	3.65670170080166	0.19	0.011	0	Microglia
Itga9	0	3.65492855265164	0.185	0.018	0	Microglia
Tmem37	0	3.65258343927576	0.369	0.037	0	Microglia
Ms4a6b	0	3.65077349579748	0.389	0.023	0	Microglia
Itgb5	0	3.65008564204098	0.856	0.137	0	Microglia
Lilra5	0	3.63203188130873	0.059	0.004	0	Microglia
Abcb4	0	3.63201789806297	0.138	0.011	0	Microglia
Fam78a	0	3.63122018167984	0.063	0.006	0	Microglia
Guca1a	0	3.61875203052094	0.053	0.004	0	Microglia
Gm38843	0	3.61756254836636	0.1	0.006	0	Microglia
Ifngr1	0	3.61642741153483	0.861	0.187	0	Microglia
H2-Ob	0	3.60897602356957	0.073	0.005	0	Microglia
Dok1	0	3.60226229653616	0.175	0.015	0	Microglia
Tanc2	0	3.59857474143904	0.707	0.107	0	Microglia
Gpr157	0	3.59754191543603	0.071	0.007	0	Microglia
Kctd12	0	3.59073658217118	0.888	0.197	0	Microglia
Lyn	0	3.59022827934483	0.773	0.129	0	Microglia
Fmnl1	0	3.58962228930307	0.273	0.02	0	Microglia
Slc16a10	0	3.58540542359302	0.086	0.006	0	Microglia
Ssh2	0	3.58482848840928	0.808	0.186	0	Microglia
Plekho1	0	3.58442296122136	0.582	0.065	0	Microglia
Arhgap25	0	3.57193543864184	0.27	0.028	0	Microglia
Man2b1	0	3.5640312928366	0.76	0.133	0	Microglia
Slc16a3	0	3.5634906257102	0.084	0.011	0	Microglia
Ubash3b	0	3.56062061767059	0.417	0.06	0	Microglia
Rps6ka1	0	3.5600617744897	0.456	0.063	0	Microglia
Ctsz	0	3.54506951584793	0.92	0.257	0	Microglia
Ptpn18	0	3.53923472540782	0.613	0.056	0	Microglia
Trim30d	0	3.52189625352439	0.203	0.019	0	Microglia
Ccl2	0	3.52050594837026	0.062	0.006	0	Microglia
Rab32	0	3.49886009565696	0.156	0.015	0	Microglia
Slc29a3	0	3.49742148978307	0.623	0.114	0	Microglia
Fam46a	0	3.49681479712396	0.405	0.056	0	Microglia
Lyl1	0	3.47731806336901	0.253	0.028	0	Microglia
Rnf128	0	3.46759445764705	0.075	0.007	0	Microglia
Ccr1	0	3.46720307980612	0.072	0.007	0	Microglia
Icam1	0	3.46706151131056	0.255	0.027	0	Microglia
Epsti1	0	3.45175430492284	0.187	0.015	0	Microglia
Adap2os	0	3.44797560531095	0.241	0.021	0	Microglia
Arrb2	0	3.44392839740394	0.484	0.058	0	Microglia
Fam111a	0	3.43995250529622	0.276	0.034	0	Microglia
Tmem86a	0	3.43821020996157	0.437	0.049	0	Microglia
Adap2	0	3.43246056951597	0.575	0.056	0	Microglia
Dapp1	0	3.42299198468843	0.386	0.04	0	Microglia
Grn	0	3.42126178979187	0.874	0.219	0	Microglia
Marcks	0	3.41176029621468	0.968	0.295	0	Microglia
Zfp710	0	3.40953928055675	0.38	0.049	0	Microglia
Cryl1	0	3.40343868186209	0.257	0.025	0	Microglia
Entpd1	0	3.38841511709063	0.745	0.13	0	Microglia
Zfp991	0	3.38415147399386	0.073	0.008	0	Microglia
Lst1	0	3.37979370917311	0.457	0.036	0	Microglia
Rnase6	0	3.37624217436386	0.068	0.006	0	Microglia
Gm10138	0	3.37607874454186	0.135	0.017	0	Microglia
Kcnd1	0	3.37530148151136	0.101	0.007	0	Microglia
Stk10	0	3.37527176039781	0.226	0.026	0	Microglia
P3h2	0	3.36508368780263	0.128	0.014	0	Microglia
Sh3bp1	0	3.36324978762275	0.187	0.017	0	Microglia
Col27a1	0	3.36051172952643	0.312	0.037	0	Microglia
Phyhd1	0	3.35881215723644	0.059	0.005	0	Microglia
Daglb	0	3.35748844644769	0.46	0.069	0	Microglia
Espl1	0	3.35568674934215	0.058	0.006	0	Microglia
Cd200r1	0	3.35375872440654	0.081	0.006	0	Microglia
Ecscr	0	3.34125634849577	0.623	0.1	0	Microglia
Mef2c	0	3.33650330226705	0.905	0.212	0	Microglia
Slc25a45	0	3.32907800360217	0.222	0.03	0	Microglia
Ighm	0	3.31029339295678	0.463	0.028	0	Microglia
Fkbp5	0	3.30928648393263	0.202	0.026	0	Microglia
Cds1	0	3.2976227010492	0.162	0.014	0	Microglia
Arsb	0	3.28789430803977	0.651	0.125	0	Microglia
Rel	0	3.2780663735219	0.284	0.042	0	Microglia
Nfkbie	0	3.2772624795838	0.065	0.007	0	Microglia
Accs	0	3.27491017746345	0.139	0.016	0	Microglia
Gngt2	0	3.27487073564028	0.478	0.055	0	Microglia
Ttc7	0	3.2739726105606	0.18	0.022	0	Microglia
Gmfg	0	3.27304689380606	0.345	0.029	0	Microglia
Nrros	0	3.27252753984627	0.31	0.035	0	Microglia
Akna	0	3.27076165543988	0.224	0.025	0	Microglia
Vrk2	0	3.26865639404253	0.207	0.028	0	Microglia
Mlph	0	3.26249805736305	0.114	0.014	0	Microglia
Hexa	0	3.25579284237475	0.779	0.162	0	Microglia
Gm5431	4.43259720559737e-280	3.25231834331804	0.05	0.004	8.8204251794182e-276	Microglia
Casp4	0	3.24238105274898	0.075	0.01	0	Microglia
Smap2	0	3.2335192642201	0.774	0.194	0	Microglia
Ntpcr	0	3.22990400600097	0.465	0.069	0	Microglia
Cfh	0	3.22472686331088	0.844	0.12	0	Microglia
Ifitm10	0	3.2239864032539	0.1	0.009	0	Microglia
Apobr	0	3.22081591847942	0.085	0.008	0	Microglia
Elmo1	0	3.21964888848066	0.7	0.169	0	Microglia
Cxcl16	0	3.21829299771282	0.139	0.015	0	Microglia
Zeb2os	0	3.21622987895425	0.275	0.043	0	Microglia
Rac2	0	3.21410480370586	0.294	0.021	0	Microglia
Ppcdc	0	3.20790767607017	0.326	0.046	0	Microglia
Hps3	0	3.20128773587213	0.402	0.068	0	Microglia
Rab27a	0	3.19845466321492	0.086	0.009	0	Microglia
Cd276	0	3.19718500234644	0.075	0.008	0	Microglia
Mmp2	0	3.18927004390765	0.082	0.008	0	Microglia
P2ry10b	0	3.18459477522285	0.118	0.016	0	Microglia
Socs3	0	3.18155953127168	0.115	0.017	0	Microglia
Myl2	5.75032026100597e-297	3.17284581060013	0.051	0.004	1.14425622873758e-292	Microglia
Basp1	0	3.17060622277089	0.885	0.144	0	Microglia
Sirpa	0	3.17056985128327	0.85	0.17	0	Microglia
Maml3	0	3.16926147141518	0.345	0.046	0	Microglia
Scamp2	0	3.16884453385335	0.751	0.185	0	Microglia
B130006D01Rik	0	3.15020676063298	0.08	0.01	0	Microglia
Bmf	0	3.1376468561346	0.139	0.025	0	Microglia
Tmem206	0	3.13450132664237	0.153	0.023	0	Microglia
Plxdc2	0	3.12019433202008	0.838	0.2	0	Microglia
Nrm	0	3.11892122404292	0.127	0.019	0	Microglia
Rassf4	0	3.11586930852367	0.238	0.033	0	Microglia
Cd52	0	3.11469783957609	0.527	0.041	0	Microglia
Myc	9.78881741258824e-265	3.10824965479471	0.057	0.008	1.94787677693093e-260	Microglia
Ptpre	0	3.09088024050194	0.421	0.067	0	Microglia
P2rx7	0	3.0888051505167	0.317	0.045	0	Microglia
F11r	0	3.08827079003064	0.728	0.148	0	Microglia
Zfp658	0	3.08648768568476	0.123	0.017	0	Microglia
Pkib	0	3.08246567603173	0.108	0.011	0	Microglia
Slco2b1	0	3.08232105251932	0.758	0.153	0	Microglia
Hcst	0	3.0822928633626	0.09	0.007	0	Microglia
Pik3cd	0	3.08017957003473	0.211	0.021	0	Microglia
Gpsm3	0	3.07931770614435	0.295	0.037	0	Microglia
Tm6sf1	0	3.07917070678562	0.53	0.091	0	Microglia
Zfp36	0	3.07151992241397	0.382	0.096	0	Microglia
Tbc1d9	0	3.06870925376538	0.259	0.03	0	Microglia
Tgfb1	0	3.06348236612674	0.54	0.096	0	Microglia
Gtf2h2	0	3.05938558399918	0.414	0.074	0	Microglia
Xlr	0	3.0579056269036	0.264	0.037	0	Microglia
Clgn	0	3.05789898871919	0.106	0.02	0	Microglia
Junb	0	3.05677686413588	0.449	0.101	0	Microglia
Vav2	0	3.05467537374079	0.153	0.017	0	Microglia
Tlr12	0	3.05395504743843	0.078	0.008	0	Microglia
Ctc1	0	3.05275420855593	0.336	0.051	0	Microglia
Tep1	0	3.05078747614153	0.154	0.021	0	Microglia
Prkcd	0	3.04867538686533	0.428	0.064	0	Microglia
B930036N10Rik	0	3.04496855325196	0.147	0.018	0	Microglia
Olfml2b	0	3.04316303300831	0.122	0.023	0	Microglia
Plau	0	3.0379738388261	0.077	0.01	0	Microglia
Fes	0	3.03620470210969	0.221	0.031	0	Microglia
Npl	0	3.03456893202224	0.201	0.02	0	Microglia
Ophn1	0	3.03427798694515	0.618	0.123	0	Microglia
St3gal5	0	3.02872260979622	0.432	0.074	0	Microglia
Csmd3	0	3.02529007679114	0.298	0.063	0	Microglia
Serpinf1	0	3.02454017201186	0.216	0.019	0	Microglia
Arl10	0	3.02024768680711	0.143	0.027	0	Microglia
BC037034	0	3.01936490510965	0.279	0.034	0	Microglia
Sall3	0	3.0096253939803	0.265	0.035	0	Microglia
Naglu	0	3.00738697879693	0.207	0.035	0	Microglia
Zfp691	0	3.00581340373011	0.115	0.016	0	Microglia
Egr1	0	3.0036629551539	0.144	0.042	0	Microglia
Edem1	0	3.00041606685784	0.435	0.09	0	Microglia
Asb2	0	2.99790302729375	0.152	0.018	0	Microglia
Sh3bp2	0	2.99568471270341	0.102	0.018	0	Microglia
Sdf2l1	0	2.99165389274797	0.382	0.083	0	Microglia
Il4ra	0	2.98741372850779	0.206	0.029	0	Microglia
Epb41l2	0	2.98093753072282	0.903	0.32	0	Microglia
Sowahc	0	2.98018299566475	0.349	0.056	0	Microglia
Skap2	0	2.96785597575961	0.472	0.09	0	Microglia
Lefty1	2.18945041271653e-302	2.96461093462798	0.073	0.012	4.35678737626462e-298	Microglia
B4galt1	0	2.96229467735945	0.324	0.051	0	Microglia
Ppp1r18	0	2.96145323727816	0.417	0.069	0	Microglia
Cyba	0	2.9593706458995	0.87	0.225	0	Microglia
Limd2	0	2.95857750810832	0.48	0.066	0	Microglia
Abhd12	0	2.95516078769867	0.832	0.243	0	Microglia
Slc8a1	0	2.95248818838286	0.21	0.044	0	Microglia
Lpl	0	2.95232976162026	0.119	0.02	0	Microglia
Cmtm6	0	2.94996965303107	0.716	0.166	0	Microglia
Dtx4	0	2.94976600762466	0.313	0.042	0	Microglia
Abcb1b	0	2.92592858133551	0.085	0.012	0	Microglia
Fam49b	0	2.9257898971977	0.741	0.193	0	Microglia
Garnl3	0	2.92515693955415	0.163	0.021	0	Microglia
Ptpro	0	2.91611222275574	0.202	0.027	0	Microglia
Fos	2.79109712038733e-272	2.91109530688776	0.142	0.054	5.55400415985874e-268	Microglia
Cd164	0	2.91048104116005	0.821	0.274	0	Microglia
Armc3	0	2.90996100070068	0.086	0.009	0	Microglia
Tnfaip3	0	2.90850176265852	0.108	0.018	0	Microglia
AL590144.2	6.64913034229104e-285	2.90674874274479	0.06	0.008	1.3231104468125e-280	Microglia
Itpripl1	0	2.90589100835298	0.242	0.04	0	Microglia
Zfp90	0	2.90547349667512	0.311	0.059	0	Microglia
Hhex	0	2.90477477298093	0.328	0.057	0	Microglia
Rgs19	0	2.90054063342443	0.247	0.036	0	Microglia
Syngr1	0	2.89979383193411	0.561	0.093	0	Microglia
Nrip1	0	2.89890874394257	0.733	0.222	0	Microglia
Slc41a3	7.87029590419902e-256	2.89677137987701	0.054	0.007	1.56611018197656e-251	Microglia
Pla2g4a	0	2.88205068693325	0.299	0.07	0	Microglia
Hps4	0	2.8738396762336	0.376	0.076	0	Microglia
Ankrd44	0	2.86628281050566	0.457	0.099	0	Microglia
Dennd2c	0	2.85835889148969	0.112	0.018	0	Microglia
Arhgef6	0	2.85323793730663	0.279	0.043	0	Microglia
Amz1	0	2.85224579201689	0.094	0.013	0	Microglia
Mknk1	0	2.84525618088382	0.258	0.043	0	Microglia
Gusb	0	2.8404292971061	0.425	0.086	0	Microglia
Rp2	0	2.83963546621	0.357	0.065	0	Microglia
Dennd4a	0	2.8318571086245	0.559	0.144	0	Microglia
Dnase2a	0	2.82806219660798	0.258	0.042	0	Microglia
Slc9a9	0	2.82246455123948	0.3	0.062	0	Microglia
Ints6l	0	2.82212431243499	0.495	0.112	0	Microglia
Gsdmd	0	2.79818593763872	0.175	0.029	0	Microglia
Man1c1	0	2.78495285672197	0.274	0.047	0	Microglia
Acer3	0	2.78423074153754	0.359	0.072	0	Microglia
Atf3	3.28268744967844e-189	2.7835359109601	0.086	0.029	6.53221975611513e-185	Microglia
Ifngr2	0	2.77140051769777	0.427	0.082	0	Microglia
Snx29	0	2.76857279693789	0.235	0.055	0	Microglia
Arhgap11a	0	2.76690725270383	0.082	0.011	0	Microglia
Ctsc	0	2.76489131880442	0.622	0.101	0	Microglia
Camk1	0	2.76237310073934	0.644	0.168	0	Microglia
Spata13	0	2.75875953612082	0.322	0.068	0	Microglia
Cttnbp2nl	0	2.75189846806994	0.688	0.194	0	Microglia
Tfe3	0	2.75170096958438	0.356	0.076	0	Microglia
Cd83	0	2.75057089735084	0.161	0.033	0	Microglia
Gns	0	2.75055025168039	0.654	0.157	0	Microglia
Serinc3	0	2.74983179712896	0.969	0.506	0	Microglia
Cdk1	1.72476559791525e-214	2.74799204560514	0.053	0.009	3.43211106329155e-210	Microglia
Plxnb2	0	2.74656556017214	0.51	0.087	0	Microglia
Bmp2k	0	2.74478746386949	0.714	0.22	0	Microglia
AU020206	0	2.73432242953241	0.171	0.031	0	Microglia
Fosb	3.26826544198186e-236	2.72978136234547	0.077	0.019	6.50352140299971e-232	Microglia
Numb	0	2.72798367250172	0.523	0.132	0	Microglia
Scoc	0	2.72424124716442	0.831	0.312	0	Microglia
Casp8	0	2.72027726069376	0.416	0.084	0	Microglia
Eya4	0	2.71998275603769	0.153	0.025	0	Microglia
Il17ra	0	2.70792284520595	0.237	0.041	0	Microglia
Arhgdib	0	2.68027958969874	0.589	0.106	0	Microglia
Srgap2	0	2.67202615817924	0.807	0.262	0	Microglia
Syngr2	0	2.66755278431265	0.462	0.122	0	Microglia
Cfap74	0	2.66109027396277	0.091	0.011	0	Microglia
Psme2b	1.06702363688646e-294	2.65867313918997	0.079	0.015	2.12327033504037e-290	Microglia
Trim5	0	2.65593180497278	0.111	0.021	0	Microglia
Ly96	0	2.65276127968361	0.169	0.032	0	Microglia
Trp53cor1	0	2.64542576348015	0.081	0.015	0	Microglia
Card6	0	2.64091329274703	0.119	0.022	0	Microglia
Tor4a	6.99500282656548e-222	2.63884343751721	0.055	0.009	1.39193561245827e-217	Microglia
Prcp	0	2.63489122365466	0.358	0.077	0	Microglia
Zfp217	0	2.63020968385819	0.164	0.028	0	Microglia
Pmepa1	0	2.62704323424565	0.755	0.246	0	Microglia
Ms4a6c	0	2.62626938183272	0.195	0.018	0	Microglia
Calhm2	0	2.62606364480618	0.128	0.024	0	Microglia
Dusp6	0	2.62513710835372	0.561	0.133	0	Microglia
Rnf19b	0	2.61515999680681	0.197	0.04	0	Microglia
Sp110	0	2.60654211917414	0.184	0.037	0	Microglia
Apobec1	0	2.60627206412369	0.157	0.024	0	Microglia
Slc25a37	0	2.60335623970372	0.271	0.049	0	Microglia
Cebpb	0	2.60075234359294	0.437	0.066	0	Microglia
Mob3c	0	2.59958907874533	0.154	0.031	0	Microglia
2310040G24Rik	5.37319437508984e-297	2.59813982287458	0.075	0.013	1.06921194869913e-292	Microglia
Apobec3	0	2.59205727936249	0.322	0.067	0	Microglia
Rcsd1	0	2.58416561079735	0.459	0.094	0	Microglia
Mcm3	0	2.58346584762325	0.141	0.032	0	Microglia
Tmem268	1.8191263172639e-305	2.58018613002155	0.095	0.022	3.61987945872344e-301	Microglia
Nuak1	0	2.57940819955887	0.328	0.079	0	Microglia
Soga1	0	2.57388077137163	0.293	0.079	0	Microglia
Csf2ra	0	2.5706227163267	0.216	0.042	0	Microglia
Ptprj	0	2.57028104320894	0.363	0.07	0	Microglia
Cd79b	0	2.56972018086447	0.134	0.007	0	Microglia
Hfe	0	2.56804402931068	0.287	0.055	0	Microglia
Nagpa	0	2.56767072271458	0.236	0.053	0	Microglia
Rnaset2a	0	2.56386416147394	0.422	0.09	0	Microglia
Man1a	0	2.56201898458216	0.456	0.121	0	Microglia
Mef2a	0	2.55391630527323	0.843	0.341	0	Microglia
Ctsa	0	2.54524275259262	0.692	0.222	0	Microglia
Pvt1	1.46263872722887e-269	2.54201600047819	0.071	0.013	2.91050480331273e-265	Microglia
Tubgcp5	0	2.53888454119323	0.415	0.107	0	Microglia
H2-M3	0	2.53593071535894	0.177	0.038	0	Microglia
Cep152	0	2.53387114150464	0.09	0.018	0	Microglia
Rinl	0	2.53208105554377	0.113	0.023	0	Microglia
Creg1	0	2.53046750532525	0.667	0.185	0	Microglia
Fchsd2	0	2.52530649405381	0.57	0.147	0	Microglia
9930111J21Rik2	0	2.52286262046343	0.51	0.119	0	Microglia
Ifi204	1.01515403507011e-202	2.52210688496056	0.053	0.01	2.020055014386e-198	Microglia
Arid3a	0	2.51766635726031	0.147	0.031	0	Microglia
Sft2d1	0	2.51736537678895	0.588	0.183	0	Microglia
Rnasel	0	2.5146510553979	0.134	0.02	0	Microglia
Gm10605	8.65138821526673e-276	2.51403878513373	0.05	0.005	1.72153974095593e-271	Microglia
Pros1	0	2.51154823661245	0.59	0.148	0	Microglia
Pecr	8.07616031974496e-292	2.51037060725032	0.092	0.022	1.60707514202605e-287	Microglia
Gm27010	7.7577694610111e-214	2.50812669312011	0.071	0.018	1.5437185450466e-209	Microglia
Snx18	0	2.50029084499762	0.556	0.153	0	Microglia
Stab1	0	2.49915538782131	0.477	0.068	0	Microglia
Gng10	0	2.49352326251633	0.069	0.009	0	Microglia
Myo7a	0	2.49258760186263	0.093	0.013	0	Microglia
Map3k14	0	2.48825723216943	0.096	0.018	0	Microglia
Pdk1	0	2.48510658945338	0.235	0.043	0	Microglia
Tifa	0	2.48433957382244	0.287	0.053	0	Microglia
Acox3	0	2.48083787484149	0.237	0.057	0	Microglia
Comtd1	0	2.48038321234879	0.208	0.044	0	Microglia
Fam212a	0	2.46821695558681	0.285	0.064	0	Microglia
Cotl1	0	2.46519461705752	0.535	0.103	0	Microglia
Hist1h2ac	4.51943182671084e-207	2.46145191810599	0.072	0.019	8.9932173919719e-203	Microglia
Renbp	0	2.4611608331773	0.145	0.026	0	Microglia
Lrba	0	2.45826844785015	0.413	0.108	0	Microglia
Cklf	0	2.45589317058809	0.273	0.061	0	Microglia
Adrb1	0	2.45444017481188	0.164	0.031	0	Microglia
Mctp1	0	2.45389722651414	0.093	0.012	0	Microglia
Ivns1abp	0	2.44855251802498	0.737	0.206	0	Microglia
Gm6277	0	2.44312338453537	0.098	0.016	0	Microglia
Tgif1	0	2.4431011041818	0.122	0.023	0	Microglia
Pld1	0	2.44183517670699	0.302	0.078	0	Microglia
Man2b2	0	2.43852380457738	0.142	0.03	0	Microglia
Tgif2	3.19699736951169e-171	2.43147013555464	0.05	0.011	6.3617050655913e-167	Microglia
Kcnk13	0	2.42846254552995	0.208	0.068	0	Microglia
Hs6st1	0	2.42770397843387	0.228	0.06	0	Microglia
Ebf3	0	2.42737758851902	0.085	0.009	0	Microglia
Ctsl	0	2.42650574831897	0.916	0.446	0	Microglia
Lpar6	0	2.42609015996643	0.412	0.111	0	Microglia
Ccdc93	0	2.42255378379924	0.249	0.056	0	Microglia
B3galnt1	0	2.42044106289995	0.113	0.017	0	Microglia
Tmem104	0	2.39638299061962	0.146	0.032	0	Microglia
Ddx31	3.13921077821843e-227	2.39395642640497	0.066	0.014	6.24671552757686e-223	Microglia
Timp2	0	2.38552942921724	0.697	0.221	0	Microglia
Pwwp2a	0	2.38471335154851	0.465	0.137	0	Microglia
Rptor	0	2.38137211801307	0.297	0.076	0	Microglia
Snx5	0	2.37725101598553	0.666	0.214	0	Microglia
A930024E05Rik	3.11689122336258e-216	2.37683297443824	0.061	0.012	6.20230184536919e-212	Microglia
Bco2	0	2.37570397860305	0.089	0.013	0	Microglia
Frmd4a	0	2.37078031531609	0.74	0.212	0	Microglia
Jun	0	2.36770701183777	0.675	0.343	0	Microglia
Fam91a1	0	2.36640839305861	0.426	0.122	0	Microglia
Acp2	0	2.36573929452216	0.43	0.119	0	Microglia
Lpin2	0	2.36397698608643	0.377	0.082	0	Microglia
Ehd4	0	2.3628620502964	0.426	0.106	0	Microglia
Tnfrsf21	0	2.3625101038092	0.322	0.067	0	Microglia
Dok3	0	2.36051818357177	0.098	0.011	0	Microglia
Fam72a	5.5862852698896e-249	2.3597985293213	0.073	0.016	1.11161490585533e-244	Microglia
Col15a1	0	2.35958207201167	0.091	0.007	0	Microglia
Twf2	0	2.35845303071589	0.42	0.113	0	Microglia
Tcirg1	0	2.35507355674949	0.238	0.059	0	Microglia
Edem2	0	2.34961938032074	0.299	0.09	0	Microglia
Gpr160	0	2.34757155124044	0.14	0.033	0	Microglia
Ctsb	0	2.34558402233224	0.912	0.433	0	Microglia
Pald1	0	2.34395359589211	0.241	0.047	0	Microglia
Fhod1	0	2.34389211124348	0.124	0.026	0	Microglia
Zfp36l2	0	2.34347102791726	0.689	0.209	0	Microglia
Baz1a	0	2.34236775805115	0.177	0.043	0	Microglia
Engase	1.27480523763645e-224	2.34131740358843	0.063	0.013	2.53673494237277e-220	Microglia
Rcbtb2	0	2.34120514828627	0.364	0.089	0	Microglia
Rnaset2b	0	2.33868952925786	0.391	0.1	0	Microglia
Nhlrc3	0	2.33857047147049	0.192	0.048	0	Microglia
Commd8	0	2.33296521649687	0.585	0.193	0	Microglia
Slc26a2	0	2.3308506243556	0.173	0.042	0	Microglia
Cyfip1	0	2.32978551021956	0.834	0.339	0	Microglia
Ifi27l2a	0	2.32892338345488	0.18	0.038	0	Microglia
Primpol	7.15373454180905e-238	2.32674557369207	0.075	0.018	1.42352163647458e-233	Microglia
Med12l	0	2.32649288833472	0.173	0.028	0	Microglia
Orai1	0	2.32609285942054	0.476	0.137	0	Microglia
Tmem106a	1.28450095333248e-306	2.32531073932475	0.074	0.012	2.55602844703631e-302	Microglia
Arid3b	0	2.3226208297974	0.146	0.036	0	Microglia
Rgmb	0	2.32037714830723	0.296	0.077	0	Microglia
Slc29a1	0	2.31982831728116	0.226	0.051	0	Microglia
Dglucy	0	2.31959589188291	0.101	0.02	0	Microglia
Trpv2	0	2.31607306250648	0.122	0.021	0	Microglia
Gm12166	7.62196296499104e-186	2.31350227499037	0.063	0.016	1.51669441040357e-181	Microglia
Alg8	3.44347555716776e-273	2.30914852459152	0.079	0.017	6.85217201120812e-269	Microglia
Stard3	0	2.30805870705568	0.322	0.103	0	Microglia
Wdr81	0	2.3068065462078	0.158	0.041	0	Microglia
Usp2	0	2.30629660468719	0.398	0.095	0	Microglia
BC017643	0	2.30519161754988	0.247	0.063	0	Microglia
Cdk6	0	2.30364052410443	0.27	0.059	0	Microglia
Klk8	0	2.29433359677383	0.151	0.033	0	Microglia
Disc1	9.97152086275113e-245	2.29391777031793	0.066	0.013	1.98423293647885e-240	Microglia
Nek6	0	2.28743010585852	0.203	0.036	0	Microglia
Nckap5l	0	2.2866754451985	0.156	0.037	0	Microglia
Fam110a	0	2.28532685451938	0.177	0.044	0	Microglia
Eef2k	0	2.2841373548266	0.307	0.073	0	Microglia
Cdca7	3.42833583131197e-280	2.28371052793013	0.085	0.019	6.82204547072769e-276	Microglia
Mlxip	0	2.28224786650837	0.136	0.03	0	Microglia
B2m	0	2.28106866416028	0.962	0.451	0	Microglia
Mbnl1	0	2.28084269652666	0.83	0.37	0	Microglia
Fbxw4	0	2.27764345729232	0.173	0.042	0	Microglia
Btg2	0	2.27317391364722	0.536	0.203	0	Microglia
Nfatc1	0	2.27293411736264	0.23	0.056	0	Microglia
Morc3	0	2.2689246248116	0.379	0.109	0	Microglia
Bhlhe41	0	2.26584818737589	0.376	0.099	0	Microglia
Tec	0	2.26553961004149	0.175	0.038	0	Microglia
Ogfrl1	0	2.26177449490939	0.412	0.097	0	Microglia
N4bp2l1	0	2.26112843711058	0.137	0.036	0	Microglia
Kif21b	0	2.25447147519085	0.325	0.08	0	Microglia
Tmem131l	0	2.2517202238163	0.162	0.033	0	Microglia
Evl	0	2.25104866932633	0.411	0.101	0	Microglia
Rrbp1	0	2.25017585080705	0.908	0.473	0	Microglia
Tcn2	0	2.24828027005967	0.549	0.173	0	Microglia
Il13ra1	0	2.24572263907749	0.262	0.06	0	Microglia
Skil	0	2.24121630140369	0.531	0.163	0	Microglia
Crlf2	0	2.24107900223836	0.215	0.058	0	Microglia
Pnpo	5.33111482540339e-303	2.23195072129992	0.086	0.018	1.06083853910702e-298	Microglia
Ptpn1	0	2.22948767820193	0.501	0.164	0	Microglia
Slc10a3	2.09116429727926e-220	2.21780821321203	0.073	0.018	4.161207835156e-216	Microglia
Kdm2b	0	2.2174514443708	0.281	0.076	0	Microglia
Mertk	0	2.21358172649346	0.697	0.198	0	Microglia
Slc38a7	5.47966206632403e-295	2.21338665095586	0.099	0.025	1.09039795457782e-290	Microglia
Klhl6	0	2.2126236464477	0.242	0.06	0	Microglia
Slc46a1	0	2.21007986014623	0.139	0.026	0	Microglia
Tpst2	0	2.21004725916596	0.422	0.125	0	Microglia
Sgpl1	0	2.20887361850163	0.324	0.087	0	Microglia
Ier5	0	2.20830899236348	0.581	0.194	0	Microglia
Retreg1	0	2.20826926534506	0.515	0.165	0	Microglia
Wdr44	0	2.20409284679058	0.252	0.078	0	Microglia
Vps18	0	2.20227189960258	0.163	0.044	0	Microglia
Osbpl11	0	2.19350853994183	0.32	0.097	0	Microglia
Gmpr	0	2.18739797525155	0.176	0.041	0	Microglia
Slc35c2	0	2.17624133065043	0.213	0.052	0	Microglia
Sfmbt1	0	2.17611821128626	0.152	0.04	0	Microglia
Tspan4	0	2.17230739072346	0.28	0.076	0	Microglia
Txnip	0	2.17015781443363	0.712	0.229	0	Microglia
2900060B14Rik	1.97935768894973e-145	2.16876429348542	0.055	0.015	3.93872386524107e-141	Microglia
Icosl	0	2.16740556366999	0.142	0.03	0	Microglia
Slc36a1	0	2.16522384727952	0.23	0.054	0	Microglia
Map3k5	0	2.15975048058601	0.091	0.02	0	Microglia
Sgk1	0	2.15971332769588	0.586	0.198	0	Microglia
Ldlrad4	0	2.15900772338831	0.19	0.068	0	Microglia
Trim30a	0	2.15418290454498	0.313	0.084	0	Microglia
Slc16a7	0	2.15021442358631	0.143	0.048	0	Microglia
Lrrk1	0	2.14656198668461	0.211	0.055	0	Microglia
Zcwpw1	4.37270177276687e-149	2.14579383211351	0.074	0.026	8.70123925762879e-145	Microglia
Ccng2	0	2.14259707647015	0.299	0.095	0	Microglia
Tmem55b	0	2.14163665091499	0.475	0.172	0	Microglia
Slc4a7	0	2.14099492360856	0.289	0.077	0	Microglia
Pnp	0	2.13833587031177	0.642	0.213	0	Microglia
Sp140	1.36669038664953e-227	2.13476445862586	0.083	0.022	2.7195772003939e-223	Microglia
Tbc1d31	0	2.1336828831125	0.105	0.025	0	Microglia
Phf11d	7.01628225375638e-239	2.13278590895649	0.079	0.019	1.39617000567498e-234	Microglia
Asph	0	2.13032233900082	0.583	0.159	0	Microglia
Man1a2	0	2.1273089474512	0.557	0.205	0	Microglia
Erp29	0	2.12132385143153	0.769	0.339	0	Microglia
Cks2	2.77471567812474e-277	2.11260052455996	0.078	0.016	5.52140672790043e-273	Microglia
Armc7	6.94504657272835e-178	2.11019525429145	0.057	0.013	1.38199481750721e-173	Microglia
Clic1	0	2.10669226204305	0.785	0.272	0	Microglia
Iffo1	0	2.10092425321988	0.238	0.077	0	Microglia
Fgd3	1.28015538084764e-104	2.09854352536805	0.063	0.025	2.54738119234871e-100	Microglia
Camk1d	0	2.09376291784246	0.254	0.051	0	Microglia
Slfn2	0	2.09094408688993	0.23	0.057	0	Microglia
Nfya	0	2.08808875624761	0.22	0.064	0	Microglia
B3galt4	2.42694807626894e-153	2.08796526914261	0.071	0.023	4.82938397696757e-149	Microglia
Evi2a	0	2.08723445422399	0.581	0.15	0	Microglia
Mtdh	0	2.08562548109612	0.832	0.409	0	Microglia
Bcl2l11	0	2.08249860826607	0.165	0.051	0	Microglia
Slc15a4	0	2.07823675568674	0.219	0.076	0	Microglia
Mogs	0	2.07598957912328	0.128	0.035	0	Microglia
Smad3	0	2.06988473328497	0.141	0.036	0	Microglia
Cd9	0	2.06942025569598	0.873	0.36	0	Microglia
Sumf1	0	2.06809632868787	0.141	0.043	0	Microglia
Myd88	0	2.06093983530084	0.13	0.035	0	Microglia
Cdca4	6.32375125185567e-249	2.05646531290989	0.092	0.026	1.25836326160676e-244	Microglia
Zfp120	0	2.05138307091484	0.204	0.06	0	Microglia
Orai2	0	2.05060054984691	0.13	0.022	0	Microglia
Psmb8	0	2.04752219961615	0.446	0.12	0	Microglia
Slc12a9	0	2.04731567519066	0.284	0.086	0	Microglia
Asah1	0	2.04085923820991	0.651	0.237	0	Microglia
Cst3	0	2.03626090898577	0.999	0.953	0	Microglia
Khk	0	2.03399045693309	0.203	0.057	0	Microglia
Wdfy2	0	2.03380449965483	0.235	0.077	0	Microglia
Zfp984	5.7501571159823e-202	2.03181389512811	0.084	0.026	1.14422376450932e-197	Microglia
Rab8b	0	2.03115989505048	0.391	0.135	0	Microglia
Cyp4v3	0	2.03093631360887	0.154	0.039	0	Microglia
Stambpl1	0	2.02241143374462	0.138	0.032	0	Microglia
Rnf135	2.98934376804349e-201	2.02165217545592	0.092	0.031	5.94849516402975e-197	Microglia
Mapk14	0	2.01678804677039	0.293	0.089	0	Microglia
St6galnac4	0	2.0167679829771	0.285	0.074	0	Microglia
Prkab1	0	2.01637976744072	0.22	0.065	0	Microglia
Akr1b10	0	2.01586109824684	0.273	0.065	0	Microglia
Npnt	0	2.0118388747039	0.132	0.029	0	Microglia
Sqor	0	2.0112658364877	0.215	0.063	0	Microglia
Nuak2	7.3129414134184e-202	2.01005313299542	0.056	0.011	1.45520221185613e-197	Microglia
Csk	0	2.00338061963783	0.324	0.1	0	Microglia
Zfp697	0	2.00280681764316	0.106	0.026	0	Microglia
Traf5	0	2.00165687828317	0.131	0.038	0	Microglia
H6pd	1.57521438365453e-176	2.00077929408905	0.058	0.014	3.13451910203415e-172	Microglia
Tal1	0	1.99738259574386	0.12	0.034	0	Microglia
Pacsin2	0	1.99458316745444	0.331	0.105	0	Microglia
Nfkbiz	7.04518270375919e-159	1.99220065575004	0.073	0.024	1.40192090622104e-154	Microglia
Vrk1	0	1.98803838330491	0.177	0.057	0	Microglia
Tbc1d8	1.82210128843257e-181	1.98551090935239	0.066	0.018	3.62579935385197e-177	Microglia
Jade2	0	1.9844978768392	0.164	0.051	0	Microglia
Tmem229b	1.95131004296826e-203	1.98214731022443	0.095	0.032	3.88291185450255e-199	Microglia
Heatr5a	0	1.97958372406	0.307	0.11	0	Microglia
Ndst2	3.41884482566296e-293	1.97803309141611	0.11	0.031	6.80315931858673e-289	Microglia
Slc46a3	0	1.97689350179377	0.157	0.047	0	Microglia
Cflar	0	1.97673063501577	0.503	0.175	0	Microglia
Stat6	0	1.97293845244825	0.197	0.057	0	Microglia
Trib1	0	1.97205512026489	0.185	0.047	0	Microglia
Cep68	0	1.97025321947005	0.276	0.093	0	Microglia
Cyp27a1	7.66976329689785e-85	1.96971517228169	0.058	0.025	1.5262061984497e-80	Microglia
Mgat1	0	1.96808751737945	0.343	0.114	0	Microglia
Ctsh	0	1.96774454691696	0.761	0.231	0	Microglia
Dock11	0	1.9569541768921	0.185	0.044	0	Microglia
Picalm	0	1.95690563236152	0.776	0.365	0	Microglia
Epha2	0	1.95596344566511	0.102	0.025	0	Microglia
Fscn1	0	1.95354900956913	0.504	0.158	0	Microglia
Pmp22	0	1.95234486419668	0.533	0.191	0	Microglia
Btg1	0	1.95142183876933	0.604	0.229	0	Microglia
Plagl2	0	1.95029155041387	0.128	0.039	0	Microglia
Crlf3	0	1.948713010041	0.423	0.137	0	Microglia
B430010I23Rik	0	1.94539685331892	0.191	0.063	0	Microglia
Tspan33	0	1.94359602264609	0.104	0.021	0	Microglia
Agpat2	1.32650726124026e-176	1.94270827868634	0.062	0.016	2.639616799142e-172	Microglia
Ggta1	0	1.94026707917696	0.208	0.059	0	Microglia
Trpm4	3.36060879192649e-227	1.9402587787278	0.087	0.025	6.68727543505452e-223	Microglia
Lgals3bp	0	1.93942550727115	0.376	0.136	0	Microglia
Mtr	0	1.93546141385911	0.169	0.045	0	Microglia
Usp21	0	1.93309922420238	0.156	0.049	0	Microglia
Rassf2	0	1.93072966557913	0.376	0.136	0	Microglia
Capza2	0	1.92684737150558	0.87	0.453	0	Microglia
Chsy1	0	1.92496799186864	0.199	0.054	0	Microglia
H2-Q7	2.99875294458508e-185	1.9246228205165	0.059	0.014	5.96721848442985e-181	Microglia
Adam17	0	1.9235664325134	0.439	0.169	0	Microglia
Bbs9	2.14278912618319e-250	1.92057678790682	0.113	0.038	4.26393608219193e-246	Microglia
Git2	0	1.92016767808839	0.618	0.262	0	Microglia
Gnpda1	7.07444961545784e-303	1.917148345968	0.122	0.038	1.40774472897996e-298	Microglia
Mpi	0	1.91586570739562	0.12	0.035	0	Microglia
Mlec	0	1.91463130381715	0.495	0.195	0	Microglia
Plod3	0	1.91231793487477	0.322	0.122	0	Microglia
Rin3	0	1.91219876516579	0.15	0.045	0	Microglia
St3gal6	0	1.91067376922058	0.617	0.192	0	Microglia
E2f3	0	1.90838933344619	0.163	0.052	0	Microglia
Mfap3	0	1.90801675896557	0.315	0.109	0	Microglia
Fkbp15	0	1.90516721053181	0.307	0.111	0	Microglia
Zfp652	0	1.90346603304835	0.484	0.192	0	Microglia
Nav2	0	1.90277715597587	0.517	0.179	0	Microglia
Comt	0	1.90016835626034	0.584	0.228	0	Microglia
Eml4	0	1.89961879801596	0.351	0.116	0	Microglia
Bach1	0	1.8973078816304	0.385	0.146	0	Microglia
Ppm1h	0	1.89353000671373	0.218	0.072	0	Microglia
Agmo	0	1.89238752317104	0.187	0.052	0	Microglia
Ywhah	0	1.88992396489038	0.759	0.333	0	Microglia
Dgkd	0	1.88915882909316	0.262	0.088	0	Microglia
Cmtm3	0	1.88874535336277	0.221	0.061	0	Microglia
Hltf	0	1.88780948156391	0.329	0.13	0	Microglia
Riox1	1.61536573232136e-168	1.88203240298208	0.076	0.025	3.21441627074627e-164	Microglia
Sh2b3	0	1.88113832013462	0.287	0.083	0	Microglia
Prpsap2	0	1.87937405415568	0.26	0.089	0	Microglia
Arhgap17	0	1.87840674304496	0.436	0.177	0	Microglia
Abcd1	4.9682439385133e-306	1.87761825136497	0.134	0.044	9.88630861324761e-302	Microglia
AC149090.1	0	1.87704759132513	0.671	0.268	0	Microglia
Hmox1	1.38302610869079e-210	1.87233659415536	0.087	0.027	2.7520836536838e-206	Microglia
Dbf4	1.81092626328557e-123	1.86841813978837	0.05	0.015	3.60356217131196e-119	Microglia
2810474O19Rik	0	1.8676289183055	0.447	0.178	0	Microglia
Rogdi	0	1.8650928638549	0.251	0.061	0	Microglia
Csnk1e	0	1.86237290712419	0.545	0.22	0	Microglia
Zfp429	5.67828082536314e-113	1.86134702147808	0.052	0.017	1.12992110143901e-108	Microglia
Wasf2	0	1.85989546138934	0.703	0.302	0	Microglia
Dhx34	2.41696650524121e-175	1.85775444451506	0.069	0.02	4.80952164877949e-171	Microglia
Trim65	5.72434777622486e-251	1.85464429508099	0.121	0.042	1.13908796399098e-246	Microglia
Cdk5r1	0	1.85123202658173	0.249	0.058	0	Microglia
Arhgef40	0	1.84928908480299	0.288	0.09	0	Microglia
Ubtd1	7.86228180091291e-236	1.84865777975556	0.097	0.029	1.56451545556366e-231	Microglia
Exog	2.1345786167426e-128	1.84863096867504	0.067	0.025	4.24759798945609e-124	Microglia
Ncaph	4.75200962812843e-171	1.84737436787152	0.077	0.025	9.45602395901276e-167	Microglia
Ccnd1	0	1.84464254243637	0.419	0.118	0	Microglia
Htra2	0	1.84401357194454	0.171	0.053	0	Microglia
Slc35c1	2.26632708219886e-114	1.84312469620224	0.053	0.018	4.50976426086751e-110	Microglia
Sik2	0	1.84030271365666	0.211	0.085	0	Microglia
Nfkb1	0	1.84018422550615	0.403	0.141	0	Microglia
Sft2d2	0	1.83801243760623	0.355	0.133	0	Microglia
Bin1	0	1.8374610405996	0.8	0.23	0	Microglia
Bend6	0	1.83745553306649	0.101	0.022	0	Microglia
Lsp1	0	1.83641977563803	0.1	0.014	0	Microglia
Aagab	0	1.83614595234652	0.196	0.06	0	Microglia
Lin9	6.25304592831194e-155	1.83527372981776	0.071	0.023	1.24429360927479e-150	Microglia
Arrdc1	2.80552372458e-227	1.83500535067837	0.094	0.028	5.58271165954174e-223	Microglia
Tgfbr2	0	1.83228289596206	0.626	0.204	0	Microglia
Prdm1	6.52209516752972e-203	1.83221632117399	0.082	0.024	1.29783171738674e-198	Microglia
Cers6	0	1.83186360111766	0.092	0.016	0	Microglia
Irak4	2.45927565376577e-192	1.82801519445461	0.091	0.031	4.89371262342851e-188	Microglia
Zfp385a	0	1.82598715119083	0.168	0.037	0	Microglia
Tnfrsf1a	0	1.82331722511552	0.324	0.101	0	Microglia
Cerk	0	1.81535268218961	0.348	0.127	0	Microglia
Ttf2	1.18575517826256e-127	1.81158362230338	0.052	0.015	2.35953422922467e-123	Microglia
Hacd4	0	1.81129108201464	0.133	0.034	0	Microglia
Klhl36	3.72821247998955e-165	1.81014780392723	0.064	0.018	7.41877001393121e-161	Microglia
Znrf2	0	1.80603856125989	0.293	0.097	0	Microglia
Anxa3	0	1.8038428285834	0.737	0.235	0	Microglia
1600014C10Rik	2.40952946483581e-186	1.80059745305098	0.083	0.027	4.79472268207678e-182	Microglia
Tmem176b	0	1.79999580943613	0.662	0.23	0	Microglia
Hspa1b	1.42220311594467e-97	1.79837732303405	0.078	0.036	2.83004198041829e-93	Microglia
Reep4	1.17120385045446e-124	1.79792387812487	0.063	0.022	2.33057854201933e-120	Microglia
Tmem135	0	1.79599437019288	0.32	0.116	0	Microglia
Mob1a	0	1.79475863260076	0.431	0.161	0	Microglia
3222401L13Rik	0	1.79447411587176	0.204	0.076	0	Microglia
Sipa1	0	1.79378575648382	0.405	0.133	0	Microglia
Tle3	0	1.79332110947378	0.228	0.085	0	Microglia
Abracl	0	1.79302318151618	0.262	0.086	0	Microglia
Mitf	8.0655681310391e-172	1.79298999246837	0.116	0.051	1.60496740239547e-167	Microglia
Galnt10	6.30473321933813e-226	1.78985498283932	0.093	0.028	1.25457886331609e-221	Microglia
Uap1l1	4.54230736386809e-194	1.78363202107488	0.09	0.03	9.03873742336112e-190	Microglia
Rapgef5	0	1.78321570984466	0.489	0.164	0	Microglia
Arhgap27	0	1.78173404651897	0.182	0.061	0	Microglia
Clta	0	1.78098262339538	0.852	0.454	0	Microglia
Cxxc5	0	1.7780387345941	0.393	0.167	0	Microglia
Tmem64	0	1.77634598632282	0.209	0.064	0	Microglia
Aldh16a1	1.69974433299258e-134	1.77434063369391	0.07	0.025	3.38232124822194e-130	Microglia
Ythdf2	0	1.77364775155545	0.321	0.133	0	Microglia
P2rx4	0	1.77322071960563	0.193	0.073	0	Microglia
Mfsd12	2.4162369381422e-169	1.77238583364818	0.07	0.021	4.80806988320915e-165	Microglia
Rreb1	0	1.77043978072627	0.317	0.097	0	Microglia
Dock10	0	1.76972286625064	0.656	0.185	0	Microglia
Mfng	0	1.76863550498931	0.202	0.068	0	Microglia
Atmin	2.51724506044188e-303	1.76611926672848	0.145	0.051	5.00906594577329e-299	Microglia
Arrdc4	1.38172748882003e-142	1.76186078465822	0.05	0.013	2.74949953000298e-138	Microglia
Vwa5a	0	1.76084146121288	0.27	0.097	0	Microglia
Dusp7	0	1.75726712219792	0.427	0.193	0	Microglia
Dclre1c	1.20817298180443e-260	1.75655181546627	0.12	0.04	2.40414341649264e-256	Microglia
Tmem176a	0	1.75581589894244	0.484	0.145	0	Microglia
Atad2	2.32062263972306e-171	1.75222699279145	0.098	0.038	4.61780699078492e-167	Microglia
Nfxl1	0	1.74960187719428	0.157	0.052	0	Microglia
Fen1	1.23785246488999e-68	1.74841057445062	0.056	0.026	2.46320261988459e-64	Microglia
Psmb9	0	1.74614145698763	0.222	0.074	0	Microglia
Lgals9	0	1.74337468995887	0.417	0.134	0	Microglia
Tmem185b	1.40952504991348e-293	1.73856443393435	0.134	0.045	2.80481389682284e-289	Microglia
P4ha1	0	1.73446591175053	0.545	0.215	0	Microglia
Plxdc1	0	1.73274082475055	0.128	0.025	0	Microglia
Ski	0	1.73020569387366	0.548	0.236	0	Microglia
Arap1	0	1.73019919129185	0.147	0.052	0	Microglia
Acsl4	0	1.72923098992976	0.199	0.073	0	Microglia
Mob3a	5.25428218617131e-159	1.72847937542435	0.095	0.038	1.04554961222623e-154	Microglia
Hlx	9.23227642262596e-193	1.728287184625	0.089	0.029	1.83713068533834e-188	Microglia
Tmc6	3.11678219576312e-141	1.72091990064092	0.078	0.029	6.20208489134904e-137	Microglia
Usp35	8.94490185909413e-187	1.71976690528809	0.074	0.022	1.77994602094114e-182	Microglia
Asap3	1.002914790371e-120	1.71945239450466	0.053	0.017	1.99570014135926e-116	Microglia
Itm2b	0	1.71580596185171	0.993	0.819	0	Microglia
Nectin2	1.28211564013578e-237	1.71564962626821	0.102	0.032	2.5512819123062e-233	Microglia
Glb1	0	1.71548620237535	0.156	0.053	0	Microglia
Gfm2	0	1.71308881222095	0.167	0.059	0	Microglia
Rin2	0	1.71291349161725	0.403	0.153	0	Microglia
Pkn1	0	1.7067507081411	0.379	0.148	0	Microglia
Klhl18	3.09454869692528e-257	1.7033562239745	0.128	0.046	6.15784245201161e-253	Microglia
Zfp839	2.55538569831718e-182	1.70202946256462	0.094	0.034	5.08496200108136e-178	Microglia
Pprc1	1.32723277590271e-146	1.70159790329605	0.076	0.027	2.64106050076881e-142	Microglia
Tap1	0	1.70135252363672	0.157	0.051	0	Microglia
Inpp4b	0	1.70073536960584	0.322	0.066	0	Microglia
Mzt2	0	1.70036230815874	0.228	0.078	0	Microglia
Gng2	0	1.69747686137075	0.351	0.082	0	Microglia
Pold4	0	1.69450884121234	0.292	0.113	0	Microglia
Rhob	0	1.6938056143183	0.869	0.492	0	Microglia
Nipa2	0	1.69329387815441	0.368	0.144	0	Microglia
D6Wsu163e	1.91560468740282e-221	1.69156957257755	0.121	0.047	3.81186176746288e-217	Microglia
Snn	0	1.69049588263972	0.268	0.087	0	Microglia
Plxna4	0	1.68864425723769	0.187	0.043	0	Microglia
Aftph	0	1.68654037167563	0.43	0.182	0	Microglia
Etv3	0	1.68458117736728	0.207	0.079	0	Microglia
Pfkfb3	0	1.68300172941049	0.167	0.064	0	Microglia
Tspan14	0	1.68150098201832	0.399	0.17	0	Microglia
Lactb	0	1.68116380379085	0.301	0.123	0	Microglia
Trit1	3.00224649762241e-175	1.67930870506366	0.078	0.025	5.97417030561883e-171	Microglia
Brip1os	1.3333213852831e-298	1.67733837765511	0.154	0.058	2.65317622457484e-294	Microglia
Dennd4b	6.98960489910835e-200	1.6740925567744	0.096	0.033	1.39086147887357e-195	Microglia
Mafg	0	1.6734585426842	0.386	0.166	0	Microglia
Cebpz	0	1.67235540752137	0.452	0.212	0	Microglia
Gab2	4.11582262547381e-223	1.67155533368966	0.118	0.044	8.19007544243033e-219	Microglia
Abca1	0	1.66940714249764	0.601	0.265	0	Microglia
Zufsp	0	1.66929338774224	0.345	0.141	0	Microglia
Cbl	0	1.66874898651713	0.473	0.212	0	Microglia
Plekhm3	2.08444540580654e-165	1.66696373216446	0.128	0.06	4.14783791301444e-161	Microglia
Hnmt	1.35726248081195e-260	1.66638786369041	0.113	0.036	2.7008166105677e-256	Microglia
Tbc1d16	0	1.66441647149521	0.184	0.077	0	Microglia
Slc45a4	8.05824093117871e-297	1.66425023585674	0.121	0.037	1.60350936289525e-292	Microglia
Akap13	0	1.66350481541848	0.53	0.191	0	Microglia
Tmem144	0	1.66161715390504	0.19	0.072	0	Microglia
Malt1	5.69142912893692e-269	1.65968117722033	0.139	0.052	1.13253748236716e-264	Microglia
Cep192	0	1.65945570795843	0.16	0.056	0	Microglia
Tbc1d22a	1.18315249258388e-209	1.65868140130995	0.115	0.044	2.35435514499267e-205	Microglia
Phka2	2.86914927729457e-180	1.65824979273774	0.085	0.029	5.70932014688847e-176	Microglia
B4galnt1	7.03763722333056e-203	1.65763085196713	0.062	0.014	1.40041943107055e-198	Microglia
Stk4	0	1.65518920056711	0.256	0.105	0	Microglia
Wipf1	0	1.65257965969108	0.249	0.112	0	Microglia
Strada	6.09865240526003e-287	1.64925706862943	0.137	0.048	1.21357084212269e-282	Microglia
Gm42047	1.82338332051232e-109	1.64538661019493	0.058	0.021	3.62835046948746e-105	Microglia
Otud1	3.24267537996898e-234	1.64536931373864	0.115	0.04	6.45259973860027e-230	Microglia
Heatr1	2.3436572776015e-178	1.6436193546852	0.1	0.038	4.66364361669922e-174	Microglia
Isoc2b	3.34965060192391e-139	1.64308077281218	0.058	0.018	6.66546973276838e-135	Microglia
Sbno2	3.19063065640126e-299	1.6425353597423	0.157	0.059	6.34903594317287e-295	Microglia
Ralb	0	1.6414105127917	0.351	0.134	0	Microglia
Arhgap39	0	1.64116702663373	0.217	0.079	0	Microglia
Rnf180	0	1.64114971089044	0.159	0.04	0	Microglia
Pip4k2a	0	1.64105549403213	0.551	0.207	0	Microglia
Vamp8	0	1.64061803066142	0.505	0.19	0	Microglia
Entpd7	8.40871276458144e-130	1.64040572096934	0.073	0.027	1.67324975302406e-125	Microglia
Oma1	1.19686421786722e-282	1.63987305006326	0.148	0.056	2.38164010713398e-278	Microglia
Tram1	0	1.63952891079025	0.464	0.203	0	Microglia
Gdi2	0	1.63950018174238	0.751	0.396	0	Microglia
Sh3kbp1	0	1.63795274688293	0.262	0.121	0	Microglia
Acads	0	1.63437238893073	0.214	0.077	0	Microglia
Trmt10a	1.60628778525781e-126	1.63310509242803	0.075	0.029	3.19635206388451e-122	Microglia
Cnot8	0	1.63070828876607	0.242	0.103	0	Microglia
Rnpep	0	1.63054815111363	0.302	0.122	0	Microglia
Zfp513	2.41684526982583e-203	1.63046348068714	0.109	0.041	4.80928040242642e-199	Microglia
Flcn	1.28570643984166e-235	1.62917280770563	0.142	0.058	2.55842724464092e-231	Microglia
Lpcat1	0	1.62902839785765	0.231	0.073	0	Microglia
Tgs1	0	1.62835919325799	0.362	0.161	0	Microglia
Zfp715	0	1.62823325039665	0.167	0.06	0	Microglia
Camk2d	0	1.62741333250174	0.458	0.18	0	Microglia
Arpc4	0	1.62739224887039	0.489	0.206	0	Microglia
Sparc	0	1.62424040377167	0.981	0.593	0	Microglia
Tmem168	0	1.62404726380356	0.235	0.101	0	Microglia
Zfyve19	6.2633963302029e-186	1.6240375585845	0.109	0.044	1.24635323574707e-181	Microglia
Tmsb4x	0	1.62341265444914	0.997	0.842	0	Microglia
Prex1	0	1.62203481578246	0.463	0.188	0	Microglia
Gpr137b	2.41001299975984e-264	1.61867177934827	0.136	0.05	4.7956848682221e-260	Microglia
Rap2c	0	1.61770284494908	0.217	0.09	0	Microglia
Plgrkt	0	1.61707801544986	0.371	0.155	0	Microglia
Asap1	0	1.61703815054923	0.4	0.177	0	Microglia
Abhd17c	0	1.61671869271215	0.173	0.06	0	Microglia
Cndp2	0	1.61557183285371	0.215	0.087	0	Microglia
Pnpla7	0	1.61554284633246	0.267	0.079	0	Microglia
Zfp994	7.98485520927579e-201	1.61112375719927	0.123	0.05	1.58890633809379e-196	Microglia
Cebpzos	0	1.61011425782323	0.35	0.144	0	Microglia
Ccdc106	3.54122925079128e-213	1.60922263388012	0.068	0.016	7.04669208614958e-209	Microglia
Washc4	0	1.6092083110952	0.375	0.175	0	Microglia
Srd5a3	1.73516965334552e-170	1.60657219331461	0.12	0.053	3.45281409319226e-166	Microglia
Tnfaip8	0	1.60634166587875	0.369	0.12	0	Microglia
Sgce	0	1.60589175720207	0.34	0.153	0	Microglia
Ncoa3	0	1.60565770878984	0.265	0.111	0	Microglia
2510039O18Rik	0	1.60271873257266	0.189	0.077	0	Microglia
Fez2	0	1.60027310240339	0.397	0.176	0	Microglia
Galnt4	7.26357616195831e-206	1.5982028550129	0.102	0.036	1.44537902046808e-201	Microglia
Nos1ap	5.96067127139097e-251	1.59674895783946	0.105	0.033	1.18611397629409e-246	Microglia
Dnajc25	2.61994387169359e-179	1.59234350951017	0.105	0.041	5.21342631028307e-175	Microglia
Sun2	0	1.59148573687977	0.241	0.093	0	Microglia
Cd3eap	1.07082024945232e-229	1.59058802847273	0.147	0.063	2.13082521438517e-225	Microglia
Rbl1	2.52739502150599e-152	1.59008220225365	0.08	0.029	5.02926335329477e-148	Microglia
Cln3	7.06337735326953e-282	1.58866963816922	0.169	0.071	1.4055414595271e-277	Microglia
Pgd	0	1.58752512284038	0.215	0.091	0	Microglia
Acsl5	0	1.58654165397443	0.168	0.059	0	Microglia
Zfp810	2.8042099656781e-124	1.58488007497482	0.069	0.026	5.58009741070286e-120	Microglia
Fuca2	0	1.5789916124507	0.244	0.083	0	Microglia
Stard9	0	1.57841933018872	0.288	0.119	0	Microglia
Senp2	0	1.57795905424141	0.313	0.129	0	Microglia
Tk2	7.14512254914858e-250	1.57721791749768	0.122	0.043	1.42180793605508e-245	Microglia
Fmnl3	0	1.57611570285469	0.339	0.123	0	Microglia
Cnpy3	0	1.57542173276915	0.297	0.123	0	Microglia
Inip	5.46710421196812e-213	1.57457098203172	0.129	0.053	1.08789906713954e-208	Microglia
Ttc13	1.24880706009847e-261	1.57399512291285	0.133	0.048	2.48500116888994e-257	Microglia
Armc5	4.65253857597646e-218	1.57397404415116	0.115	0.042	9.25808651233556e-214	Microglia
Tor3a	2.24083088490324e-260	1.57361698928447	0.145	0.056	4.45902937786896e-256	Microglia
Tln2	0	1.57200905435094	0.219	0.081	0	Microglia
Vps9d1	1.7800107271456e-278	1.57087780920016	0.169	0.071	3.54204334594703e-274	Microglia
Parp8	0	1.57068441340417	0.159	0.059	0	Microglia
Pdia3	0	1.56996621903985	0.846	0.506	0	Microglia
Frmd4b	0	1.56954106288475	0.569	0.271	0	Microglia
Rnf130	0	1.56907210526712	0.615	0.289	0	Microglia
Abcg1	1.5487919549232e-294	1.56869597612015	0.235	0.121	3.08194111110167e-290	Microglia
Cpsf4	1.75405879368739e-161	1.56559730513397	0.084	0.03	3.49040159355853e-157	Microglia
Adgrg1	0	1.56514651977607	0.585	0.25	0	Microglia
Birc3	1.74163426570557e-140	1.56474691190388	0.075	0.027	3.46567802532752e-136	Microglia
Sfi1	1.59486909620673e-191	1.56175901993622	0.096	0.034	3.17363001454177e-187	Microglia
Jpt2	9.01723749893188e-67	1.5613405766551	0.053	0.024	1.79434008991245e-62	Microglia
Dhrs3	0	1.56129461443405	0.343	0.115	0	Microglia
Abhd6	0	1.55818477873206	0.295	0.117	0	Microglia
Cradd	1.05466772384214e-124	1.55648126288292	0.088	0.038	2.09868330367347e-120	Microglia
Ssr4	0	1.55581801908578	0.624	0.323	0	Microglia
Prps2	2.00102630355596e-242	1.55459326561639	0.155	0.067	3.98184224144601e-238	Microglia
Cited2	0	1.55363016061285	0.201	0.078	0	Microglia
Jmjd1c	0	1.55261052122583	0.662	0.353	0	Microglia
Tmem219	0	1.55225055141155	0.233	0.1	0	Microglia
Nfe2l2	0	1.54906687163009	0.466	0.213	0	Microglia
Slc38a1	0	1.54871464287575	0.282	0.055	0	Microglia
Prorsd1	0	1.54798624263057	0.183	0.074	0	Microglia
Lrp1	0	1.54747121991948	0.64	0.231	0	Microglia
Mcfd2	0	1.54107402864847	0.3	0.125	0	Microglia
Zbtb1	0	1.54097949286671	0.232	0.098	0	Microglia
Umps	1.74786569977543e-151	1.54041108180176	0.078	0.028	3.47807795598312e-147	Microglia
Spcs3	0	1.54012599638587	0.258	0.108	0	Microglia
Erlin1	3.78925291643678e-180	1.53910448027375	0.109	0.044	7.54023437841754e-176	Microglia
Herpud1	0	1.5384077160135	0.382	0.178	0	Microglia
6330418K02Rik	2.97186008509481e-99	1.53473570475286	0.051	0.018	5.91370438333016e-95	Microglia
Mgmt	4.00565592777628e-108	1.53173930243355	0.059	0.021	7.97085473068202e-104	Microglia
Tpm3	0	1.53120833672799	0.686	0.347	0	Microglia
Lamp2	0	1.52910928547256	0.747	0.394	0	Microglia
Actr2	0	1.52902137757763	0.65	0.324	0	Microglia
Zcchc2	1.33295065613991e-239	1.52730075144738	0.145	0.06	2.65243851065281e-235	Microglia
Rap1b	0	1.52688489094254	0.683	0.329	0	Microglia
Tmem68	5.84273601619796e-302	1.52645422009846	0.184	0.078	1.16264603986323e-297	Microglia
Npc2	0	1.52480304082655	0.775	0.417	0	Microglia
Slc35b2	0	1.52408009174252	0.231	0.102	0	Microglia
Ppp1r9a	0	1.52386072094903	0.418	0.167	0	Microglia
Agps	0	1.52215321832705	0.296	0.142	0	Microglia
Dpy19l4	0	1.52034726122041	0.361	0.157	0	Microglia
Zfp729b	1.95043035049801e-109	1.5195394312648	0.084	0.038	3.88116135445598e-105	Microglia
Ptbp3	0	1.51898583629673	0.559	0.259	0	Microglia
Ppt1	0	1.51897545853379	0.441	0.203	0	Microglia
Rnf149	0	1.51843606300791	0.252	0.105	0	Microglia
Gpr155	0	1.51837962793324	0.363	0.177	0	Microglia
Stk17b	0	1.51787719735352	0.238	0.078	0	Microglia
Stxbp2	5.72839931292063e-181	1.51704318018405	0.074	0.022	1.13989417927808e-176	Microglia
Sncaip	6.38310621974605e-209	1.51650778784983	0.088	0.027	1.27017430666727e-204	Microglia
Pid1	0	1.51637049260132	0.346	0.111	0	Microglia
Slc44a2	0	1.51550895738869	0.231	0.092	0	Microglia
Aup1	0	1.51548029575837	0.34	0.155	0	Microglia
Tapbpl	4.49806699966673e-164	1.51060845639073	0.098	0.039	8.95070352263682e-160	Microglia
Gba	1.16840724673605e-208	1.50772971595344	0.137	0.059	2.32501358028007e-204	Microglia
Gm4673	1.30460254727752e-95	1.50651884805486	0.065	0.027	2.59602860882754e-91	Microglia
Ripk2	5.68883067679927e-120	1.50608946744788	0.078	0.032	1.13202041637629e-115	Microglia
Nbeal2	1.0349292144718e-116	1.50549293733784	0.063	0.023	2.05940564387744e-112	Microglia
Ccdc86	1.44352349211877e-162	1.50406616373407	0.123	0.057	2.87246739696713e-158	Microglia
Pdlim4	0	1.50228798394297	0.314	0.091	0	Microglia
Kcnj2	5.065599553684e-71	1.50126388984536	0.08	0.043	1.00800365518758e-66	Microglia
Map1s	8.32901422860721e-297	1.50126301707364	0.175	0.072	1.65739054135055e-292	Microglia
Nabp1	2.75120562043635e-119	1.50121330605578	0.056	0.018	5.4746240641063e-115	Microglia
Dctpp1	9.67859213415572e-305	1.49845802679308	0.21	0.097	1.92594304877565e-300	Microglia
Diaph2	0	1.49839299045419	0.327	0.14	0	Microglia
Abl1	0	1.49824739463958	0.293	0.145	0	Microglia
Fam3a	2.80347334143519e-201	1.49661854163194	0.149	0.069	5.57863160212188e-197	Microglia
Fgfr1op	3.72623092232039e-202	1.49538466452268	0.116	0.046	7.41482691232535e-198	Microglia
Nab2	7.25322562610839e-112	1.4950001005775	0.06	0.021	1.44331936733931e-107	Microglia
Tmed3	0	1.49487637051805	0.39	0.187	0	Microglia
Zfp703	0	1.4942281186676	0.22	0.076	0	Microglia
Taf6l	0	1.49368466321989	0.238	0.107	0	Microglia
Ggt5	0	1.49319951432214	0.162	0.037	0	Microglia
Casp3	2.4447571102562e-302	1.49282666033018	0.156	0.057	4.86482217369882e-298	Microglia
Lhfpl2	0	1.49054147916219	0.368	0.159	0	Microglia
Vasp	0	1.49052996860819	0.339	0.137	0	Microglia
Usp8	0	1.49015461744289	0.413	0.2	0	Microglia
Cd302	0	1.48953590670262	0.384	0.119	0	Microglia
Ormdl1	8.87479766845857e-136	1.48927068137706	0.106	0.05	1.76599598804657e-131	Microglia
Efhd2	0	1.48885692457573	0.595	0.202	0	Microglia
Slbp	0	1.48824462726394	0.201	0.084	0	Microglia
Trim12a	0	1.48655526182549	0.259	0.102	0	Microglia
Tspan18	4.99250798898873e-143	1.485812538521	0.086	0.034	9.93459164728868e-139	Microglia
Fli1	0	1.48563704339928	0.463	0.159	0	Microglia
Rnf150	2.70810245435691e-298	1.48533087257379	0.102	0.026	5.38885307392482e-294	Microglia
Hist1h2be	1.86609571372655e-108	1.48450427919874	0.099	0.049	3.71334386074447e-104	Microglia
Uba7	6.35907711666607e-198	1.48448605760865	0.111	0.042	1.26539275544538e-193	Microglia
Cap1	0	1.48443965721853	0.391	0.193	0	Microglia
Tbc1d2b	8.96885126811078e-137	1.4843768920472	0.074	0.027	1.78471171384136e-132	Microglia
Dock4	0	1.48382557716733	0.608	0.281	0	Microglia
Cebpg	0	1.48367549057767	0.402	0.197	0	Microglia
Tpp1	0	1.4828352215712	0.55	0.272	0	Microglia
Sord	1.53129832889062e-136	1.48235984101209	0.075	0.028	3.04713054465945e-132	Microglia
Sppl2a	0	1.48143934450304	0.594	0.302	0	Microglia
Tab2	0	1.47967232794827	0.481	0.246	0	Microglia
Chst12	7.54157613673458e-104	1.47868880154098	0.08	0.036	1.50069823544881e-99	Microglia
Tyms	1.05642380146779e-95	1.47824554627164	0.061	0.025	2.10217772254076e-91	Microglia
Zfp619	6.7064270457696e-62	1.47757637748567	0.052	0.024	1.33451191783769e-57	Microglia
Lrch1	5.2203035540306e-280	1.47602541995843	0.171	0.071	1.03878820421655e-275	Microglia
Thumpd3	1.81825318091476e-303	1.47599496405316	0.198	0.088	3.61814200470229e-299	Microglia
Abraxas2	0	1.47280934874944	0.24	0.103	0	Microglia
Large1	7.00512019697173e-298	1.47100592498074	0.165	0.065	1.3939488679954e-293	Microglia
Nop2	1.01518136115321e-175	1.46915208907827	0.095	0.035	2.02010939055877e-171	Microglia
Hist1h1e	0	1.46811915203752	0.311	0.184	0	Microglia
Dhdh	3.42690679308718e-94	1.46679418795113	0.06	0.024	6.81920182756417e-90	Microglia
Gmeb1	7.77358354135561e-211	1.46169824833812	0.139	0.06	1.54686538889435e-206	Microglia
Ctsf	0	1.46099374473449	0.435	0.184	0	Microglia
Senp8	3.03774841421101e-80	1.45493767839882	0.07	0.034	6.04481556943849e-76	Microglia
Zfp472	2.33179601838068e-73	1.45369125009849	0.059	0.027	4.64004089697573e-69	Microglia
Dyrk2	0	1.45321976218202	0.209	0.077	0	Microglia
Tbc1d5	0	1.45167873734215	0.289	0.145	0	Microglia
Trim27	2.60388379269992e-233	1.45158134097869	0.165	0.075	5.18146835909357e-229	Microglia
Nup88	0	1.45124396178343	0.234	0.116	0	Microglia
Trim26	0	1.44873119645698	0.245	0.12	0	Microglia
Mgat2	0	1.44848723601625	0.312	0.145	0	Microglia
Tacc1	0	1.44811089394391	0.61	0.302	0	Microglia
Sema4c	7.68968178237267e-194	1.44666611359569	0.151	0.072	1.53016977787434e-189	Microglia
Gmpr2	0	1.44390676200859	0.215	0.096	0	Microglia
Rrp1b	1.05728788973524e-152	1.44328025832011	0.101	0.043	2.10389717178415e-148	Microglia
Slc12a6	0	1.44163873717235	0.306	0.136	0	Microglia
Arid1a	0	1.44062632655624	0.528	0.272	0	Microglia
Hspa1a	4.53998219195217e-50	1.4402247857561	0.085	0.052	9.03411056376562e-46	Microglia
Csad	0	1.4388935958652	0.216	0.099	0	Microglia
Lpcat3	0	1.43757370611667	0.359	0.166	0	Microglia
Klf3	0	1.43721765871003	0.517	0.262	0	Microglia
Scpep1	0	1.43667215538794	0.181	0.072	0	Microglia
Gxylt1	3.06305497033361e-295	1.43656302414928	0.21	0.099	6.09517308546686e-291	Microglia
Tgfbi	4.79171235448641e-190	1.43559180024906	0.081	0.025	9.5350284141925e-186	Microglia
Rfc3	1.59302611655036e-111	1.43552508895209	0.085	0.039	3.16996266932356e-107	Microglia
Paox	4.55681692140434e-100	1.4353134212293	0.063	0.025	9.0676099919025e-96	Microglia
Klhdc8b	1.09628000028106e-291	1.43088692173172	0.147	0.053	2.18148757255928e-287	Microglia
Fbxl14	3.4492110447582e-229	1.43063394130095	0.154	0.067	6.86358505796434e-225	Microglia
Pfkfb4	1.09866814109264e-186	1.42825790947306	0.108	0.042	2.18623973396024e-182	Microglia
Ugcg	1.34374702386408e-243	1.42736291939937	0.156	0.066	2.67392220278713e-239	Microglia
Tmem170b	0	1.42525879141413	0.244	0.103	0	Microglia
Gemin6	1.46318503342954e-56	1.42495354317215	0.05	0.024	2.91159189802144e-52	Microglia
Naa35	0	1.42241225778677	0.358	0.174	0	Microglia
Parp14	0	1.42024588629303	0.242	0.101	0	Microglia
Srsf9	0	1.42007639952348	0.504	0.255	0	Microglia
Donson	7.21255142919167e-88	1.41865610993502	0.05	0.019	1.43522560889485e-83	Microglia
Cln8	8.32967172862838e-214	1.41817566294396	0.203	0.11	1.65752137727976e-209	Microglia
Smyd5	2.11439533358034e-101	1.41705107417901	0.053	0.019	4.20743527429152e-97	Microglia
Rap1gds1	0	1.41550961252	0.449	0.225	0	Microglia
Mbtps2	1.13803293492548e-199	1.41547861980357	0.136	0.06	2.26457173720821e-195	Microglia
Rapgef6	0	1.41413408725597	0.329	0.153	0	Microglia
Oxsm	6.60873161939443e-84	1.41404145451851	0.069	0.032	1.3150715049433e-79	Microglia
Snx24	5.81457097247164e-167	1.41373956069245	0.126	0.058	1.15704147781213e-162	Microglia
Limk1	1.10342309820841e-146	1.41264163628667	0.09	0.036	2.19570162312492e-142	Microglia
Apex1	0	1.41176511217894	0.179	0.071	0	Microglia
Rilpl1	0	1.40812646862922	0.232	0.111	0	Microglia
Trmt12	2.44331349373073e-91	1.40532636728723	0.07	0.032	4.86194952117478e-87	Microglia
Plekha2	2.57100451586055e-246	1.40473670974977	0.171	0.078	5.11604188611091e-242	Microglia
Galnt7	1.7453672410471e-167	1.40439962901168	0.147	0.074	3.47310627295963e-163	Microglia
Phtf2	3.25271120841137e-102	1.40434699283518	0.073	0.032	6.47257003361779e-98	Microglia
Cacnb2	5.97384532476353e-198	1.40303222041701	0.079	0.023	1.1887354811747e-193	Microglia
Celf2	0	1.4029057055285	0.705	0.273	0	Microglia
2210016F16Rik	3.23656625716133e-267	1.40264822788994	0.151	0.059	6.44044319512534e-263	Microglia
Cmya5	6.43889621222915e-139	1.40134533426307	0.063	0.02	1.28127595727148e-134	Microglia
Pdia6	0	1.40113987514251	0.672	0.376	0	Microglia
Rbm43	2.87535505120401e-137	1.40098430623672	0.079	0.03	5.72166901639085e-133	Microglia
Naga	3.61368137745606e-240	1.40007378410989	0.14	0.056	7.19086457299981e-236	Microglia
Etv6	9.53040882459226e-228	1.39951815506693	0.154	0.067	1.89645605200561e-223	Microglia
Madd	0	1.39768029159353	0.166	0.06	0	Microglia
Slc38a10	0	1.39704034921978	0.234	0.116	0	Microglia
Colgalt1	0	1.39651346606425	0.304	0.139	0	Microglia
Smo	0	1.39611100252792	0.222	0.089	0	Microglia
Uhrf1bp1	1.28352803918542e-107	1.39533672189312	0.07	0.029	2.55409244517506e-103	Microglia
Mthfs	5.39305015464525e-148	1.39345487442641	0.115	0.053	1.07316305027286e-143	Microglia
Mfsd11	2.6796978016312e-295	1.39116633689084	0.16	0.062	5.33233065546592e-291	Microglia
Bbc3	1.85107686347704e-158	1.39103556377065	0.103	0.043	3.68345785063296e-154	Microglia
Ykt6	0	1.39099406627859	0.241	0.11	0	Microglia
Il6st	0	1.3892213198864	0.441	0.219	0	Microglia
Mfsd10	7.2156317028629e-149	1.38802877188056	0.111	0.05	1.43583855255269e-144	Microglia
Ube2j1	0	1.38756466978871	0.224	0.102	0	Microglia
Mrc2	1.37200813911073e-121	1.3870564709778	0.053	0.016	2.73015899601645e-117	Microglia
Akr1b3	5.58013845198287e-297	1.38677963710982	0.26	0.141	1.11039175056007e-292	Microglia
Stxbp5	0	1.38480170604328	0.197	0.078	0	Microglia
Sipa1l2	0	1.38302280032856	0.253	0.107	0	Microglia
Snta1	0	1.38115863730194	0.24	0.08	0	Microglia
Mfsd1	0	1.38035775906172	0.234	0.106	0	Microglia
Sat1	0	1.38013942679957	0.725	0.334	0	Microglia
Pafah1b3	7.72112765708702e-199	1.38009716261038	0.102	0.036	1.53642719248375e-194	Microglia
Elmsan1	2.58718041794426e-134	1.37884876202714	0.125	0.064	5.14823031366728e-130	Microglia
Akirin2	0	1.37789696753368	0.443	0.232	0	Microglia
Lipo3	1.58397116358341e-100	1.3769760810162	0.062	0.025	3.15194421841463e-96	Microglia
Smad7	0	1.37601010094585	0.543	0.25	0	Microglia
Ehbp1l1	2.94896926638371e-225	1.37558535502496	0.14	0.058	5.86815394317694e-221	Microglia
B4galt6	0	1.37552055891073	0.188	0.062	0	Microglia
Lrp12	5.40647658032091e-81	1.3738566333466	0.088	0.047	1.07583477471806e-76	Microglia
Il10rb	0	1.3737468251645	0.396	0.157	0	Microglia
Tyk2	3.50790184815799e-145	1.37294256497464	0.096	0.041	6.98037388764958e-141	Microglia
Ppp2r1b	4.19625217333858e-93	1.36836539047784	0.069	0.03	8.35012219972644e-89	Microglia
Rft1	8.66206867295153e-74	1.36826613321553	0.08	0.042	1.72366504523063e-69	Microglia
Ulk2	0	1.36825860575756	0.38	0.194	0	Microglia
Galk2	4.99949107263014e-138	1.36818748752269	0.085	0.034	9.94848728542671e-134	Microglia
Zfp62	0	1.36570451071458	0.288	0.149	0	Microglia
Poc1b	5.13595398708573e-91	1.36493474387349	0.092	0.047	1.02200348389019e-86	Microglia
Taz	0	1.36421442343863	0.28	0.139	0	Microglia
Dtx3l	4.32592483144914e-216	1.36403225120821	0.138	0.057	8.60815782210065e-212	Microglia
Nmt1	0	1.36393512044001	0.434	0.219	0	Microglia
Il15	3.86587535527497e-133	1.36299186949683	0.069	0.024	7.69270536946167e-129	Microglia
Elf1	0	1.36275529524406	0.351	0.175	0	Microglia
Fnip1	0	1.36264520483918	0.298	0.151	0	Microglia
Capza1	0	1.36083163809477	0.368	0.192	0	Microglia
Kdm3b	3.42432001279178e-273	1.36045809237735	0.221	0.111	6.81405439345437e-269	Microglia
Slc38a9	0	1.36017514035925	0.267	0.136	0	Microglia
Pan3	0	1.35985841464795	0.351	0.166	0	Microglia
Pepd	3.43690204419654e-257	1.35985206555827	0.19	0.09	6.8390913777467e-253	Microglia
Rnf111	0	1.35826259609719	0.304	0.156	0	Microglia
Psap	0	1.35802192434985	0.929	0.636	0	Microglia
2810006K23Rik	1.11002709685249e-165	1.35659389867032	0.124	0.057	2.20884292002677e-161	Microglia
Ankle2	0	1.35640534300769	0.271	0.133	0	Microglia
Pik3r6	8.17975787044309e-128	1.35465382464445	0.082	0.034	1.62769001863947e-123	Microglia
Rnf166	4.47462858756622e-244	1.35457152724356	0.161	0.07	8.90406342639803e-240	Microglia
Cacna1d	0	1.35367621899099	0.116	0.03	0	Microglia
Hspa5	0	1.3536498979474	0.804	0.52	0	Microglia
Mnt	3.36777086041996e-128	1.35222215181508	0.101	0.047	6.70152723514967e-124	Microglia
Tapbp	0	1.35201535149687	0.367	0.158	0	Microglia
Gcn1l1	0	1.35154106085736	0.26	0.126	0	Microglia
Atp6v0a2	0	1.35139587954746	0.332	0.16	0	Microglia
Rps6kc1	1.48260271363058e-90	1.35022077267968	0.08	0.039	2.95023113985349e-86	Microglia
Aga	8.95102661767674e-263	1.3500455593613	0.209	0.104	1.7811647866515e-258	Microglia
Hivep3	0	1.34979903561421	0.328	0.142	0	Microglia
Stt3a	0	1.34973817411441	0.305	0.16	0	Microglia
Sh3bgrl3	0	1.34847257232992	0.686	0.37	0	Microglia
AU041133	6.96264641649237e-95	1.34503967125496	0.079	0.037	1.38549701041782e-90	Microglia
Atp6v0b	0	1.34423828887273	0.798	0.457	0	Microglia
Abcc1	5.4278650417197e-96	1.34379113297705	0.08	0.038	1.0800908646518e-91	Microglia
Elk3	0	1.34312867472273	0.337	0.137	0	Microglia
Clint1	0	1.33970051480017	0.35	0.178	0	Microglia
Mgme1	3.92395800791397e-110	1.33936823025663	0.101	0.05	7.808284039948e-106	Microglia
Sema4g	1.28131948069666e-137	1.33877520499876	0.065	0.022	2.54969763463829e-133	Microglia
Pfn1	0	1.33875347661655	0.795	0.464	0	Microglia
Arpc2	0	1.33749880783161	0.744	0.417	0	Microglia
Rmi1	1.86159694856691e-188	1.33740772224243	0.131	0.058	3.70439176795329e-184	Microglia
Phf14	0	1.33717797922952	0.531	0.284	0	Microglia
Cc2d1b	6.56138779932606e-131	1.33652093960258	0.117	0.059	1.30565055818789e-126	Microglia
Snx10	0	1.33651882735083	0.222	0.087	0	Microglia
Dse	5.09159900783645e-150	1.33601538493958	0.067	0.021	1.01317728656938e-145	Microglia
Ucp2	0	1.33505244676204	0.519	0.194	0	Microglia
Ppp1r15a	2.04086017115384e-98	1.33376246988316	0.111	0.061	4.06110765457902e-94	Microglia
Pigv	1.45655445451462e-83	1.33309975680143	0.064	0.028	2.89839770903863e-79	Microglia
Spty2d1	3.13292459538727e-225	1.33297121951348	0.19	0.095	6.23420665236114e-221	Microglia
Gatb	1.71252533138149e-98	1.3328978082702	0.068	0.029	3.40775415691603e-94	Microglia
Tsix	0	1.3319990840112	0.25	0.115	0	Microglia
Chml	1.00863557784628e-83	1.32535782255419	0.069	0.032	2.00708393635631e-79	Microglia
Slx4ip	6.05944448660572e-77	1.32533485138544	0.069	0.033	1.20576885838967e-72	Microglia
Trim36	7.90651712354746e-42	1.32516754526301	0.091	0.061	1.57331784241471e-37	Microglia
Eed	1.18720639389333e-229	1.32459226194022	0.18	0.086	2.36242200320834e-225	Microglia
Calr	0	1.32307767251239	0.864	0.571	0	Microglia
Gfer	1.8885660103287e-189	1.3218639118782	0.146	0.069	3.75805750395308e-185	Microglia
Bcdin3d	9.61732727211268e-77	1.32101987678779	0.09	0.049	1.9137519538777e-72	Microglia
Smcr8	4.44666119802282e-101	1.32028968169508	0.08	0.037	8.84841111794561e-97	Microglia
Snx17	0	1.31696782288947	0.392	0.21	0	Microglia
Prag1	2.01550843520006e-94	1.31687405254686	0.135	0.082	4.01066023520461e-90	Microglia
Clcn5	4.14067489530691e-122	1.316406814113	0.132	0.072	8.23952897417122e-118	Microglia
Irf2bp2	0	1.31626148963508	0.548	0.306	0	Microglia
3110062M04Rik	2.6558897495008e-121	1.31612603277831	0.102	0.049	5.28495501253164e-117	Microglia
Grk2	0	1.31277974837871	0.325	0.145	0	Microglia
Alg5	0	1.31247808887266	0.256	0.131	0	Microglia
Gpatch2l	2.30386298437004e-124	1.31022128328166	0.102	0.048	4.58445695259794e-120	Microglia
Tox4	0	1.31009286976022	0.303	0.16	0	Microglia
Gramd1a	0	1.30996150334391	0.188	0.077	0	Microglia
Zfp65	1.63108637606474e-107	1.30973969401127	0.102	0.052	3.24569877973122e-103	Microglia
Erf	2.91392093206097e-189	1.3090944072481	0.184	0.099	5.79841126270812e-185	Microglia
Cd82	7.39924817113037e-276	1.30864359906674	0.248	0.132	1.47237639357323e-271	Microglia
Tln1	0	1.30829500843744	0.607	0.334	0	Microglia
Mettl21a	6.00591312959644e-131	1.30737725046157	0.088	0.037	1.1951166536584e-126	Microglia
Wsb1	0	1.30736154486797	0.419	0.175	0	Microglia
Pknox1	5.81102106027291e-128	1.30659195370858	0.136	0.073	1.15633508078371e-123	Microglia
Ccdc115	9.39623927389312e-203	1.30622535535277	0.177	0.09	1.86975765311199e-198	Microglia
Heca	9.64159067396156e-292	1.30522763436905	0.239	0.122	1.91858012821161e-287	Microglia
Gtpbp2	1.12561300437649e-300	1.30388074106673	0.247	0.126	2.23985731740877e-296	Microglia
Ncstn	2.61964903187772e-286	1.30321174518728	0.231	0.117	5.21283960853348e-282	Microglia
Arpc1b	0	1.30271222374865	0.668	0.329	0	Microglia
Nans	6.58093691470692e-129	1.30087553695588	0.108	0.052	1.30954063665753e-124	Microglia
Sh3tc1	7.28970905425677e-102	1.30045217792376	0.074	0.032	1.45057920470655e-97	Microglia
Ccdc22	2.46057406427789e-120	1.2998924237879	0.09	0.041	4.89629633050658e-116	Microglia
Stx7	0	1.29284978197	0.454	0.248	0	Microglia
Arhgap12	0	1.29258985590238	0.298	0.133	0	Microglia
Xbp1	0	1.29099984842642	0.414	0.219	0	Microglia
Tpp2	0	1.29058853240642	0.3	0.153	0	Microglia
Gm26782	1.12049363657442e-114	1.28973535319761	0.096	0.045	2.22967028741944e-110	Microglia
Eif4ebp1	1.17860315924962e-161	1.28959338613179	0.106	0.044	2.34530242659082e-157	Microglia
Med11	2.73322516760065e-71	1.28895184065793	0.075	0.039	5.43884476100853e-67	Microglia
Derl1	0	1.28830159194979	0.394	0.205	0	Microglia
Irf2	0	1.28790869993968	0.475	0.245	0	Microglia
Rab35	0	1.2876454680129	0.259	0.123	0	Microglia
Snx2	0	1.28755688805805	0.33	0.167	0	Microglia
Ufsp2	1.04255685879056e-277	1.28615025249303	0.235	0.122	2.07458389330733e-273	Microglia
Mboat7	0	1.28586922833034	0.197	0.081	0	Microglia
Ctbs	2.38128565152058e-266	1.28574052171594	0.18	0.08	4.73852031796081e-262	Microglia
Lrwd1	4.97548809672233e-105	1.28340549490902	0.076	0.033	9.90072376366776e-101	Microglia
Pign	1.16684823127667e-174	1.28205107656441	0.141	0.068	2.32191129541744e-170	Microglia
Bach2	2.59657375632992e-165	1.28122777765181	0.149	0.075	5.16692211772091e-161	Microglia
H2-T24	3.264409206722e-79	1.28049469977991	0.066	0.031	6.4958478804561e-75	Microglia
Tns3	0	1.27834786889255	0.315	0.149	0	Microglia
Txndc11	1.43975422902149e-208	1.27759739531082	0.148	0.066	2.86496694032986e-204	Microglia
Pi4k2a	2.84317976006657e-234	1.27669882839718	0.168	0.077	5.65764340455646e-230	Microglia
Lactb2	5.42952960085181e-248	1.27644398077354	0.186	0.088	1.0804220952735e-243	Microglia
Trmt2a	4.39351832137303e-170	1.27599184187382	0.143	0.07	8.7426621077002e-166	Microglia
Zscan29	9.81247382919931e-124	1.27587894823788	0.101	0.047	1.95258416727237e-119	Microglia
Bcor	1.56235021945982e-159	1.27485171938211	0.149	0.076	3.10892070170309e-155	Microglia
Ptk2b	0	1.27462750743985	0.174	0.033	0	Microglia
Mroh1	2.52799890679628e-115	1.2740980100375	0.078	0.033	5.03046502463391e-111	Microglia
Tmx4	0	1.27378611515932	0.351	0.201	0	Microglia
Mthfd2	3.18376975714557e-37	1.27359270036474	0.07	0.045	6.33538343974396e-33	Microglia
Lrrfip1	0	1.2722437526227	0.233	0.101	0	Microglia
Tmem50a	0	1.27219845544404	0.706	0.411	0	Microglia
Ranbp10	3.02795517194842e-188	1.27154948881107	0.159	0.079	6.02532799666016e-184	Microglia
Lman2l	2.02000295007176e-256	1.27141879487695	0.199	0.096	4.0196038703478e-252	Microglia
Orai3	2.22021780375376e-199	1.26851530775639	0.144	0.065	4.4180114076896e-195	Microglia
Hs1bp3	4.25071291296521e-63	1.26692220216297	0.066	0.034	8.45849362550947e-59	Microglia
Elmod2	3.10725612682796e-202	1.26657580980956	0.158	0.075	6.18312896677495e-198	Microglia
Slc2a8	2.47835039845563e-126	1.26608984056784	0.095	0.043	4.93166945788687e-122	Microglia
Trp53	0	1.26538529337661	0.254	0.123	0	Microglia
Herc2	0	1.26450378247998	0.479	0.262	0	Microglia
Calm2	0	1.26435165081921	0.847	0.506	0	Microglia
Tigd2	3.88013544354136e-229	1.26260833161952	0.209	0.11	7.72108151910296e-225	Microglia
Dbnl	2.65457710027521e-296	1.26240607225639	0.271	0.15	5.28234297183764e-292	Microglia
Ep300	0	1.26193438148977	0.437	0.243	0	Microglia
Klhl25	1.67927286547599e-97	1.26129638577197	0.068	0.029	3.34158507501066e-93	Microglia
Arhgap24	1.11987604096894e-107	1.26087364009618	0.065	0.026	2.22844133392409e-103	Microglia
Tmed9	0	1.26083439382145	0.602	0.344	0	Microglia
Hsp90b1	0	1.26077841961923	0.908	0.633	0	Microglia
Fam35a	4.42421989788351e-78	1.25888215480488	0.079	0.04	8.80375517479839e-74	Microglia
Prpf38b	0	1.25789060067033	0.459	0.257	0	Microglia
Adam10	0	1.25633354787026	0.56	0.302	0	Microglia
Tbc1d23	0	1.25619275163982	0.233	0.112	0	Microglia
Mms19	8.8760245147818e-171	1.25546933778092	0.131	0.06	1.76624011819643e-166	Microglia
Spsb1	8.26664064115942e-110	1.25486046163798	0.16	0.099	1.64497882118431e-105	Microglia
Bcl10	0	1.25475535069248	0.277	0.147	0	Microglia
Dhrs7b	9.24085761560786e-199	1.25163320902578	0.183	0.096	1.83883825692981e-194	Microglia
Cnot2	0	1.25143418924092	0.244	0.122	0	Microglia
Ninj1	1.65421587628733e-228	1.24978312427904	0.19	0.094	3.29172417222416e-224	Microglia
Zdhhc13	1.01435227561809e-76	1.24816105499322	0.059	0.027	2.01845959325243e-72	Microglia
Slc35e1	1.25604195617739e-94	1.24798000406434	0.094	0.048	2.49939788859738e-90	Microglia
Trafd1	2.55988786971336e-232	1.24583395799753	0.194	0.097	5.09392087194262e-228	Microglia
Chd9	0	1.24533997608061	0.543	0.277	0	Microglia
Cep170	0	1.24506617103364	0.421	0.225	0	Microglia
Dcxr	2.62886819118139e-251	1.24215488813404	0.148	0.059	5.23118481363186e-247	Microglia
1600002K03Rik	4.11615156113598e-76	1.24128278748267	0.06	0.027	8.19072999150449e-72	Microglia
Rac3	8.59879934150764e-113	1.23931024930777	0.061	0.022	1.71107508096661e-108	Microglia
Kdm7a	0	1.23843812617363	0.304	0.158	0	Microglia
Nars	0	1.23828656416738	0.465	0.26	0	Microglia
Tmed5	0	1.23821295505773	0.558	0.315	0	Microglia
Fam76b	4.16919098618617e-296	1.23727255359249	0.275	0.152	8.29627314341186e-292	Microglia
Gm26724	2.57761152380687e-70	1.23630611908932	0.079	0.042	5.12918917122329e-66	Microglia
Atp6ap2	0	1.2360872236537	0.495	0.274	0	Microglia
Exosc8	9.81906462885048e-162	1.23578244445139	0.172	0.094	1.95389567049496e-157	Microglia
Idua	2.62298733016686e-110	1.23498330451207	0.078	0.034	5.21948248829903e-106	Microglia
Tuba1c	2.08440537001199e-87	1.23297597927435	0.063	0.027	4.14775824578687e-83	Microglia
Msrb2	4.48821017601875e-264	1.23149972110368	0.181	0.08	8.93108942925971e-260	Microglia
Hmox2	0	1.2305930614941	0.341	0.183	0	Microglia
D1Ertd622e	4.96520483258432e-195	1.2299392036926	0.203	0.113	9.88026109635955e-191	Microglia
Smyd4	3.22581520626601e-60	1.22926437892877	0.057	0.029	6.41904967894873e-56	Microglia
Tgfbrap1	4.15724506521004e-226	1.22898354658179	0.199	0.102	8.27250195526145e-222	Microglia
Nek7	0	1.22776148655426	0.401	0.212	0	Microglia
Ctps2	3.15376832517298e-119	1.22546258336126	0.103	0.05	6.27568359026171e-115	Microglia
Nubp1	9.41625013906771e-106	1.22442547035108	0.096	0.047	1.87373961517308e-101	Microglia
Fuca1	0	1.22152651996973	0.405	0.213	0	Microglia
Zfp263	1.02445156355142e-158	1.22138725691115	0.127	0.059	2.03855616631097e-154	Microglia
Ccdc12	0	1.22091527307604	0.459	0.26	0	Microglia
Pqlc2	1.03341682643428e-48	1.21972809700884	0.058	0.032	2.05639614292157e-44	Microglia
Ncbp3	5.7085429521529e-282	1.21949647469148	0.245	0.129	1.13594296204891e-277	Microglia
Atf1	4.41098193451787e-212	1.2178208604038	0.187	0.095	8.7774129514971e-208	Microglia
Etv5	0	1.2168815573604	0.236	0.079	0	Microglia
Zbtb34	1.81400228839651e-118	1.21675194993561	0.078	0.032	3.60968315368022e-114	Microglia
Eefsec	9.67763531130766e-60	1.21527203732993	0.067	0.036	1.92575265059711e-55	Microglia
Hist1h4d	4.24199497518648e-101	1.21410538897132	0.133	0.077	8.44114580112358e-97	Microglia
N4bp1	0	1.21326400984536	0.307	0.16	0	Microglia
Rab3ip	2.64139336540897e-92	1.21289829682627	0.092	0.047	5.25610865782732e-88	Microglia
Zmiz1	0	1.21216626733104	0.548	0.305	0	Microglia
Grb2	0	1.21214630654035	0.458	0.261	0	Microglia
AI467606	1.07673056838667e-133	1.21185593853371	0.112	0.053	2.14258615803264e-129	Microglia
Mcat	6.42163434456156e-69	1.21171894420406	0.059	0.028	1.27784101822431e-64	Microglia
Brpf1	3.06352200192053e-150	1.21086184603958	0.148	0.078	6.09610243162166e-146	Microglia
Slmap	0	1.20949138527819	0.293	0.147	0	Microglia
Tbk1	9.99923752187884e-239	1.20905532811234	0.198	0.098	1.98974827447867e-234	Microglia
Dip2b	0	1.20887338946678	0.486	0.264	0	Microglia
Alkbh1	1.5148857617801e-131	1.20727179924246	0.146	0.08	3.01447117736622e-127	Microglia
Ppp4c	2.51103904259569e-245	1.20670020029451	0.239	0.132	4.99671659086116e-241	Microglia
Uvrag	1.73724833266511e-220	1.20566844506851	0.222	0.123	3.4569504571703e-216	Microglia
Manf	0	1.2054975439025	0.517	0.3	0	Microglia
Cln5	3.14107979843234e-175	1.20501479903409	0.187	0.103	6.2504346909005e-171	Microglia
Sult1a1	1.10292007692628e-217	1.20476325555393	0.157	0.07	2.19470066107561e-213	Microglia
Zeb2	0	1.20461207018331	0.76	0.343	0	Microglia
Champ1	2.86425926113667e-109	1.2028118259816	0.107	0.055	5.69958950373587e-105	Microglia
Usp12	4.48483779658338e-241	1.20207048602474	0.2	0.1	8.92437873142127e-237	Microglia
Zfp873	1.13531448235005e-55	1.20131752182848	0.053	0.027	2.25916228842837e-51	Microglia
Parp9	8.28481739207666e-183	1.2012373214647	0.141	0.065	1.64859581284934e-178	Microglia
Coa4	9.23089077022024e-72	1.19804952671538	0.076	0.04	1.83685495436613e-67	Microglia
Eri1	1.82664181377491e-80	1.19769690560318	0.119	0.072	3.6348345452307e-76	Microglia
Pigk	7.5076288556287e-236	1.19764084530647	0.23	0.126	1.49394306598156e-231	Microglia
Eloa	1.10067967101891e-220	1.19764014568646	0.235	0.134	2.19024247736052e-216	Microglia
Rpl10	0	1.19691397033963	0.852	0.545	0	Microglia
Stx2	8.90196737202348e-134	1.1967013042816	0.143	0.078	1.77140248735895e-129	Microglia
Zfp748	7.48740115575413e-80	1.19571047763334	0.094	0.051	1.48991795598351e-75	Microglia
Hps1	2.78271811201887e-75	1.19508703778386	0.053	0.023	5.53733077110634e-71	Microglia
Tcof1	9.23638806794708e-121	1.19408590395134	0.14	0.078	1.83794886164079e-116	Microglia
Slc35e3	6.6306114221134e-40	1.19389653258797	0.057	0.033	1.31942536688634e-35	Microglia
Smg9	1.48680260089127e-113	1.19349156127764	0.1	0.049	2.95858849551354e-109	Microglia
Commd7	9.85066520487374e-239	1.19308770631625	0.239	0.134	1.96018386911783e-234	Microglia
Otulin	3.06550362801161e-187	1.19298134310835	0.177	0.092	6.1000456693803e-183	Microglia
Nucb2	1.41928644148277e-110	1.1905745070284	0.092	0.043	2.82423808990656e-106	Microglia
Pik3r1	0	1.19050373631381	0.567	0.318	0	Microglia
Lrrc8d	1.96763498514387e-98	1.18927915247357	0.152	0.095	3.91539685693779e-94	Microglia
Capzb	0	1.18639637308731	0.591	0.341	0	Microglia
Tes	1.87513123475678e-100	1.18612455065862	0.097	0.049	3.73132364404251e-96	Microglia
0610030E20Rik	3.07485818578374e-187	1.18549251682226	0.199	0.111	6.11866030389106e-183	Microglia
Cebpd	0	1.18423991473272	0.381	0.16	0	Microglia
Ppip5k2	2.08012350377756e-123	1.18323446061982	0.148	0.084	4.13923776016698e-119	Microglia
Gclc	2.44352264129296e-216	1.18072101621298	0.2	0.106	4.86236570390886e-212	Microglia
Thada	6.23616239122459e-66	1.18030667916808	0.061	0.03	1.24093395422978e-61	Microglia
Pigu	1.29786158127092e-95	1.18015340252105	0.107	0.058	2.58261476057101e-91	Microglia
Rsrp1	0	1.18000834678377	0.877	0.606	0	Microglia
Sgk3	1.33461289558064e-195	1.17879094084232	0.207	0.116	2.65574620091592e-191	Microglia
Arvcf	3.26143261552829e-152	1.17819546958779	0.089	0.035	6.48992476163974e-148	Microglia
Dusp12	1.93508522256701e-79	1.17481455527383	0.083	0.043	3.8506260843861e-75	Microglia
Dph5	2.179324589691e-74	1.17473155444475	0.098	0.057	4.33663800102611e-70	Microglia
Fam117b	5.90157517553327e-289	1.17456244433561	0.272	0.15	1.17435444417937e-284	Microglia
Slf2	0	1.17365201432096	0.278	0.144	0	Microglia
Papd4	8.31142025536203e-191	1.17350060817222	0.169	0.085	1.65388951661449e-186	Microglia
Pbx2	1.10308013424707e-194	1.17109399765228	0.168	0.084	2.19501915913824e-190	Microglia
Pck2	6.53544125750644e-205	1.17026029956526	0.127	0.051	1.30048745583121e-200	Microglia
Alyref2	1.39664053954642e-48	1.16961182476708	0.062	0.035	2.77917500964341e-44	Microglia
Krcc1	0	1.16954800351011	0.386	0.221	0	Microglia
H2-K1	0	1.16850034211177	0.616	0.308	0	Microglia
Ebp	1.80502259429265e-280	1.16812069498043	0.295	0.174	3.59181446038295e-276	Microglia
Cdc25a	2.1639892615078e-72	1.16794642903687	0.063	0.03	4.30612223147437e-68	Microglia
Psen1	3.88250463321185e-211	1.1666154258128	0.203	0.109	7.72579596962826e-207	Microglia
Rnf145	3.21608643645478e-209	1.16549283525764	0.165	0.079	6.39969039990136e-205	Microglia
Ctns	5.29394830258458e-130	1.16486192699297	0.112	0.054	1.05344277273131e-125	Microglia
Actb	0	1.16371594264631	0.997	0.825	0	Microglia
Ttc39b	1.20726359658232e-201	1.16369181654257	0.141	0.062	2.40233383083916e-197	Microglia
Nucb1	0	1.1632381666195	0.368	0.2	0	Microglia
Sirt7	4.06238855958608e-209	1.16019298877629	0.214	0.118	8.08374699472034e-205	Microglia
Ltbr	4.29385018656754e-191	1.16014777098851	0.143	0.065	8.54433248625074e-187	Microglia
Tor2a	4.47622593647502e-215	1.15925343565467	0.173	0.083	8.90724199099164e-211	Microglia
Ldb1	7.58963592406102e-210	1.15867945999286	0.208	0.113	1.5102616525289e-205	Microglia
Derl2	0	1.15831913020984	0.291	0.155	0	Microglia
Fau	0	1.15822435853114	0.974	0.747	0	Microglia
Acp6	6.38801091420363e-80	1.15716744393402	0.058	0.025	1.27115029181738e-75	Microglia
2010315B03Rik	2.38026748936774e-120	1.15711468520541	0.111	0.056	4.73649427709286e-116	Microglia
Meis3	1.33418919516493e-89	1.15625681057681	0.056	0.022	2.65490307945869e-85	Microglia
Msn	0	1.15624783995461	0.603	0.269	0	Microglia
Zbtb2	2.05099452220185e-54	1.15597840973835	0.074	0.042	4.08127399972946e-50	Microglia
Tmem63a	0	1.15430309272817	0.267	0.136	0	Microglia
Pabpc1	0	1.15338910490676	0.66	0.401	0	Microglia
Abtb1	4.65654902556597e-67	1.15242306029121	0.092	0.053	9.26606690597373e-63	Microglia
Ppp1r10	7.20279059190517e-280	1.15163097616327	0.29	0.169	1.43328329988321e-275	Microglia
Socs6	1.02176645091794e-128	1.15154922222595	0.157	0.09	2.03321306068162e-124	Microglia
Sema4d	0	1.15146186515324	0.352	0.153	0	Microglia
Herc6	5.6829669052098e-193	1.15052172001327	0.161	0.077	1.1308535844677e-188	Microglia
Efnb1	2.86918404632719e-110	1.14712216532581	0.101	0.049	5.70938933378648e-106	Microglia
Rasgrp3	0	1.14658035497535	0.517	0.234	0	Microglia
Tefm	3.12206710991936e-55	1.14609512230702	0.051	0.025	6.21260134202853e-51	Microglia
Kpnb1	0	1.14569124221708	0.363	0.213	0	Microglia
2810405F17Rik	4.73630955745413e-72	1.14516478082894	0.082	0.044	9.42478238837797e-68	Microglia
Golt1b	9.02267985803734e-105	1.14471142093135	0.115	0.062	1.79542306495085e-100	Microglia
H2-T23	0	1.14352436091059	0.333	0.146	0	Microglia
Zfp36l1	0	1.14271247148935	0.704	0.39	0	Microglia
Pdia4	0	1.14102135229404	0.347	0.203	0	Microglia
Rxra	8.427108765698e-91	1.14052216173049	0.079	0.038	1.67691037328625e-86	Microglia
Erap1	7.56870753431116e-230	1.13963704148497	0.192	0.094	1.50609711225258e-225	Microglia
Pbx3	1.97582437818333e-71	1.13912069291663	0.108	0.065	3.93169293014702e-67	Microglia
Gspt1	0	1.13865618023669	0.45	0.276	0	Microglia
Map3k3	1.51486087702552e-124	1.13806357291507	0.135	0.073	3.01442165919309e-120	Microglia
Tbccd1	6.75774485253596e-57	1.13771705751043	0.082	0.048	1.34472364820613e-52	Microglia
Pabpc4	2.50496373488408e-104	1.13704832809098	0.095	0.047	4.98462733604582e-100	Microglia
Gtpbp1	7.52793045300338e-85	1.13685498487781	0.078	0.038	1.49798288084314e-80	Microglia
Igtp	1.01500492162847e-163	1.1366388970712	0.132	0.061	2.0197582935485e-159	Microglia
AW146154	3.99143838739868e-39	1.13598067090928	0.061	0.037	7.94256324708464e-35	Microglia
Rcan1	4.86249339988151e-58	1.1359464249165	0.095	0.059	9.67587561642422e-54	Microglia
Uggt1	3.239803297696e-214	1.13576877034224	0.219	0.12	6.44688458208527e-210	Microglia
Gatd1	3.31558393906139e-104	1.13545843758331	0.097	0.048	6.59768048033827e-100	Microglia
Ralgps2	0	1.13514789186235	0.215	0.079	0	Microglia
Arhgef1	0	1.13460673667875	0.291	0.16	0	Microglia
Dnajc13	2.28268756635775e-215	1.13403842430055	0.217	0.119	4.54231998829528e-211	Microglia
Zfp141	3.84791886781872e-42	1.13333847217184	0.053	0.03	7.65697375507247e-38	Microglia
Tor1aip1	0	1.13325344825263	0.498	0.288	0	Microglia
Mettl1	2.52764706374873e-44	1.1328951488774	0.075	0.046	5.0297648921536e-40	Microglia
Zkscan14	1.85477235465962e-31	1.13184924528904	0.052	0.031	3.69081150853718e-27	Microglia
Gsap	9.68711163301458e-227	1.13181567011505	0.132	0.051	1.92763834385357e-222	Microglia
Parp1	6.23773343280532e-186	1.13153662908538	0.219	0.129	1.24124657579393e-181	Microglia
Ccnl1	0	1.1310182133533	0.378	0.22	0	Microglia
Nfkbil1	3.90714575987371e-97	1.13040376666263	0.105	0.056	7.77482934757269e-93	Microglia
Fam217b	4.4075366506559e-233	1.13033081198116	0.113	0.038	8.77055718114018e-229	Microglia
Dennd1b	7.22294331182335e-246	1.12994892546378	0.182	0.083	1.43729348961973e-241	Microglia
Relb	7.9431018612091e-72	1.12994824933539	0.076	0.04	1.580597839362e-67	Microglia
C87436	1.52570258834105e-66	1.1270778167897	0.12	0.077	3.03599558053985e-62	Microglia
Rhog	0	1.12625646293232	0.368	0.188	0	Microglia
Rhobtb1	3.91493578164968e-204	1.12615157563963	0.171	0.082	7.79033071190471e-200	Microglia
Saysd1	2.63466627859735e-149	1.12442834867879	0.18	0.104	5.24272242778087e-145	Microglia
Map2k1	7.06157764467535e-257	1.12425943117403	0.244	0.134	1.40518333551395e-252	Microglia
Arsk	1.02065082846152e-201	1.12353975262416	0.178	0.089	2.03099308355558e-197	Microglia
B4galt3	3.80246695618597e-89	1.12282680118095	0.101	0.054	7.56652899611447e-85	Microglia
Usf1	9.98968857165779e-157	1.12196910305662	0.166	0.091	1.98784812887418e-152	Microglia
Pik3cb	1.54878411070685e-77	1.12005891415122	0.121	0.074	3.08192550189557e-73	Microglia
Prdm11	3.57488080050748e-54	1.11998889177284	0.05	0.025	7.11365530492983e-50	Microglia
Dnajc28	3.75001819082295e-52	1.1197490454296	0.051	0.026	7.46216119791859e-48	Microglia
Polr1a	4.18980016822822e-71	1.11883253175116	0.093	0.053	8.33728335475733e-67	Microglia
Aars	6.52501506662264e-176	1.11808499349795	0.195	0.11	1.29841274810724e-171	Microglia
Jpt1	0	1.11688888367018	0.279	0.103	0	Microglia
Rnf2	7.8997359049133e-174	1.11593058600267	0.159	0.08	1.5719684477187e-169	Microglia
Mier2	2.72242827493983e-65	1.11581807516229	0.051	0.023	5.41736002430276e-61	Microglia
Nrp2	4.89545993128456e-221	1.11566486149106	0.155	0.068	9.74147571726314e-217	Microglia
Neu1	3.39411284234711e-117	1.1151944253168	0.152	0.088	6.75394514498651e-113	Microglia
Gm20045	1.66640759081161e-74	1.11492483507334	0.077	0.04	3.31598446495602e-70	Microglia
Fbrs	9.20434692866423e-134	1.11478100919621	0.144	0.078	1.83157299533489e-129	Microglia
Shkbp1	1.0490790714585e-73	1.11350105455561	0.082	0.044	2.08756244429526e-69	Microglia
Rad50	3.62961531267932e-117	1.11310473861813	0.147	0.085	7.22257151070058e-113	Microglia
Stradb	6.62719104025933e-93	1.11263907725784	0.097	0.051	1.3187447451012e-88	Microglia
0610010K14Rik	1.16609599929496e-61	1.11129993366855	0.096	0.058	2.32041442899703e-57	Microglia
Rps9	0	1.11076912245911	0.941	0.673	0	Microglia
Noc2l	1.01884690879951e-155	1.10968121973771	0.155	0.082	2.02740346382014e-151	Microglia
Gimap9	2.04134540391993e-52	1.10966198263122	0.057	0.03	4.06207321926026e-48	Microglia
Tbpl1	6.91905632225661e-138	1.10905751012125	0.151	0.083	1.37682301756584e-133	Microglia
Manba	1.81782213773379e-69	1.10892040637129	0.084	0.046	3.61728427187647e-65	Microglia
Abcd2	0	1.10850836717133	0.271	0.103	0	Microglia
Mavs	1.245694081139e-67	1.1078992305662	0.073	0.038	2.47880665205849e-63	Microglia
Smad2	4.53764916815241e-173	1.10730217597979	0.183	0.1	9.02946807970648e-169	Microglia
Ifnar2	0	1.10606110977951	0.414	0.208	0	Microglia
Bcl9l	1.26969419903216e-124	1.10573699604293	0.164	0.097	2.52656448665409e-120	Microglia
Kbtbd2	1.84675281577457e-189	1.10556748909225	0.227	0.134	3.67485342810982e-185	Microglia
Magt1	0	1.10475669127044	0.42	0.259	0	Microglia
Narf	1.58191154363979e-86	1.10442620670347	0.151	0.098	3.14784578068882e-82	Microglia
Asxl1	2.79137146885401e-165	1.10232022866462	0.185	0.104	5.5545500858726e-161	Microglia
Fance	5.22050352876588e-77	1.10200592772649	0.096	0.054	1.03882799718912e-72	Microglia
Dcakd	3.25760141034864e-147	1.10165344847606	0.145	0.075	6.48230104645277e-143	Microglia
Txnrd2	1.48488755823923e-79	1.10110403997703	0.07	0.034	2.95477775214025e-75	Microglia
Nt5dc1	2.41683067493746e-55	1.10033557839233	0.066	0.035	4.80925136005804e-51	Microglia
Sox4	0	1.10016145938929	0.46	0.167	0	Microglia
Jpx	2.14591006955571e-62	1.09783484603813	0.093	0.055	4.2701464474089e-58	Microglia
Dcaf12	1.58959443978224e-172	1.09768023865779	0.185	0.103	3.16313397572269e-168	Microglia
Ppp6r1	1.40253919876486e-231	1.09760325548014	0.21	0.11	2.79091275162219e-227	Microglia
Cops4	0	1.09671541779746	0.34	0.195	0	Microglia
Cnppd1	1.33561100316236e-118	1.09563792942311	0.16	0.095	2.65773233519278e-114	Microglia
Gm26669	2.74868298531504e-122	1.09458630234535	0.098	0.045	5.46960427247841e-118	Microglia
Tmcc3	0	1.09422815682356	0.508	0.27	0	Microglia
Fbxl20	3.16214825878079e-186	1.09379868635198	0.199	0.111	6.29235882014788e-182	Microglia
Wdr41	1.49787981569388e-38	1.09378460192669	0.087	0.058	2.98063104524925e-34	Microglia
Ppp1r21	7.06970354592181e-195	1.09375375279003	0.256	0.16	1.40680030860298e-190	Microglia
Arhgap5	0	1.09129644832279	0.867	0.581	0	Microglia
Cyb561d2	3.12681125816023e-46	1.0911865130353	0.104	0.07	6.22204172261305e-42	Microglia
Akirin1	1.03405989771085e-306	1.09112747357245	0.336	0.206	2.05767579045482e-302	Microglia
Wdr26	0	1.08896831315595	0.459	0.274	0	Microglia
Sppl3	2.64188347287466e-249	1.08788498406709	0.243	0.134	5.25708392267328e-245	Microglia
Cables1	0	1.087365751657	0.194	0.076	0	Microglia
Numa1	0	1.08615742989458	0.383	0.233	0	Microglia
Setdb1	1.57179597099396e-143	1.08500994963477	0.168	0.096	3.12771680268089e-139	Microglia
Eef2kmt	1.14906212181433e-72	1.08467811435012	0.085	0.046	2.28651871619833e-68	Microglia
Zc3h10	1.11983743734649e-40	1.08412714907096	0.062	0.036	2.22836451657577e-36	Microglia
Ccdc50	0	1.08367288266888	0.519	0.3	0	Microglia
Pom121	3.61615864715608e-154	1.08361087090602	0.198	0.119	7.19579409197589e-150	Microglia
Tra2b	0	1.08123818817758	0.435	0.262	0	Microglia
Hmgb2	3.00075365549409e-150	1.08061423047046	0.26	0.171	5.97119969906769e-146	Microglia
Twistnb	1.84973129048078e-150	1.0801739554051	0.198	0.119	3.6807802949277e-146	Microglia
Actr3	0	1.07989816711382	0.533	0.314	0	Microglia
Adam15	0	1.07846026178213	0.409	0.207	0	Microglia
Gm26699	2.82168770223146e-65	1.07758921580432	0.092	0.053	5.61487635867039e-61	Microglia
Znfx1	1.3640784060766e-138	1.07736145444769	0.204	0.128	2.71437962025182e-134	Microglia
Jak1	0	1.07607071186221	0.468	0.264	0	Microglia
Lcor	1.05179672372952e-104	1.07584380131102	0.147	0.088	2.09297030054937e-100	Microglia
Srcap	3.38531916886665e-83	1.07426396345738	0.111	0.064	6.73644661412775e-79	Microglia
Tango2	1.82033416272746e-173	1.07401967554926	0.144	0.069	3.62228295041138e-169	Microglia
Plod1	0	1.07325662487186	0.356	0.22	0	Microglia
Tsc22d2	4.65710399318961e-221	1.07142191122625	0.266	0.16	9.26717123604801e-217	Microglia
Akap10	3.71302129947385e-91	1.06899785440813	0.115	0.065	7.38854108382302e-87	Microglia
Fndc3a	3.54099031509948e-264	1.06888996292483	0.262	0.145	7.04621662801645e-260	Microglia
Sesn2	2.37796651260679e-79	1.06821087283132	0.051	0.021	4.73191556343625e-75	Microglia
Os9	0	1.06736787578336	0.407	0.241	0	Microglia
Nat9	7.44642984580659e-77	1.06706938861663	0.115	0.069	1.48176507501705e-72	Microglia
Sphk2	7.28508559814093e-68	1.06552535939284	0.094	0.055	1.44965918317406e-63	Microglia
Msl2	5.03135075259274e-248	1.06529807916481	0.265	0.153	1.00118848625843e-243	Microglia
Ddost	0	1.06493478747439	0.368	0.219	0	Microglia
H2-D1	0	1.06340867202366	0.621	0.312	0	Microglia
Kansl1	0	1.06339952993984	0.328	0.193	0	Microglia
Ccdc97	8.04698145540342e-81	1.06111216461785	0.106	0.061	1.60126883981073e-76	Microglia
Plbd2	2.03774974973396e-159	1.05981896241934	0.176	0.098	4.05491822699561e-155	Microglia
Jrkl	1.45346127630181e-74	1.05972128227043	0.128	0.081	2.89224259371297e-70	Microglia
Zfp758	1.77839732097207e-46	1.0589268275269	0.088	0.056	3.53883282900232e-42	Microglia
Rap2a	0	1.05827277444224	0.3	0.164	0	Microglia
Vps37b	2.56658727114773e-208	1.05815510523791	0.174	0.084	5.10725201085688e-204	Microglia
Creld2	7.70333049541178e-113	1.05757041019156	0.142	0.082	1.53288573528199e-108	Microglia
Rab14	0	1.0570467010302	0.74	0.483	0	Microglia
Mepce	2.60618417553532e-107	1.05703906301118	0.153	0.093	5.18604589089773e-103	Microglia
Zdhhc5	8.00567810113652e-138	1.05684346778602	0.171	0.098	1.59304988534516e-133	Microglia
Rps12	0	1.05608418450472	0.946	0.696	0	Microglia
Tmem141	5.8905578486502e-170	1.05605532396703	0.163	0.085	1.1721621063029e-165	Microglia
Ppan	3.40613827957509e-74	1.05479044745399	0.078	0.04	6.77787456252647e-70	Microglia
3110043O21Rik	1.21156395767792e-81	1.05456962469358	0.103	0.058	2.4108911193833e-77	Microglia
Pdcd2l	2.18181761188479e-55	1.05434734842039	0.089	0.054	4.34159886588955e-51	Microglia
Yeats4	1.40810383387274e-185	1.05374381285867	0.195	0.107	2.80198581902336e-181	Microglia
Taf1d	2.54269564074644e-251	1.05274985232973	0.279	0.162	5.05971005552133e-247	Microglia
Snrpb2	1.49329876700055e-179	1.052673036432	0.24	0.148	2.97151521645439e-175	Microglia
Irgm2	1.22775658494713e-156	1.05242369172224	0.145	0.072	2.4431128283863e-152	Microglia
Kpna3	3.24396332388163e-216	1.05225843453424	0.247	0.146	6.45516261819205e-212	Microglia
Fbxo34	4.7900380107037e-100	1.05209896238204	0.101	0.052	9.53169663749928e-96	Microglia
Atp13a3	6.815602167054e-291	1.05174853781463	0.265	0.141	1.35623667522207e-286	Microglia
Serp1	0	1.05115062434566	0.319	0.185	0	Microglia
Pdik1l	1.05326347032376e-74	1.04994317691904	0.115	0.069	2.09588897959725e-70	Microglia
Taok3	2.01794024460533e-207	1.04981617369937	0.236	0.138	4.01549929274014e-203	Microglia
Atp7a	8.7728065871514e-116	1.04953404811351	0.141	0.079	1.74570078277726e-111	Microglia
Fam58b	4.60640220283355e-127	1.04803300561718	0.138	0.074	9.16627974341848e-123	Microglia
Camsap1	8.83021218643708e-119	1.04795297177303	0.157	0.092	1.75712392297911e-114	Microglia
Usp24	0	1.04713756479512	0.308	0.161	0	Microglia
Ap1b1	7.13621067374729e-207	1.04704426401733	0.174	0.085	1.42003456196897e-202	Microglia
Psme1	0	1.04625955054331	0.436	0.23	0	Microglia
Alkbh3	2.05909929522109e-55	1.04479262710404	0.074	0.042	4.09740168756046e-51	Microglia
Xist	0	1.04238322736408	0.883	0.652	0	Microglia
Cbfb	3.69651385117155e-183	1.04226019165281	0.184	0.098	7.35569291244626e-179	Microglia
Prmt9	1.9347723329089e-55	1.04050218579237	0.083	0.049	3.85000346525542e-51	Microglia
Lmo2	0	1.03998514309622	0.473	0.191	0	Microglia
Hnrnpul1	0	1.03987373152092	0.378	0.224	0	Microglia
Cstf1	1.81203281480275e-47	1.03905534682416	0.069	0.04	3.60576409817599e-43	Microglia
2700062C07Rik	1.97944342551009e-48	1.03842515031722	0.08	0.049	3.93889447242252e-44	Microglia
Rps29	0	1.03816333220341	0.988	0.846	0	Microglia
Med22	1.51172770402739e-119	1.03747387004504	0.124	0.065	3.00818695824411e-115	Microglia
Fam120b	1.44423628691847e-170	1.03657613075288	0.197	0.113	2.87388578733907e-166	Microglia
Ftsj3	2.10687288247009e-62	1.03607982919455	0.104	0.064	4.19246634882723e-58	Microglia
Atp13a2	9.13731235416727e-188	1.03461616444809	0.181	0.095	1.81823378535574e-183	Microglia
Gpx1	0	1.03459663253609	0.521	0.278	0	Microglia
Sdcbp	0	1.03457135872754	0.552	0.313	0	Microglia
Nup62	6.27865183147785e-54	1.0341989313846	0.073	0.042	1.24938892794578e-49	Microglia
Ptbp1	9.54434668365771e-243	1.03300232065475	0.235	0.124	1.89922954658105e-238	Microglia
Zfp113	4.63868853636619e-52	1.03298949052456	0.088	0.054	9.23052631851507e-48	Microglia
Phf23	9.58824376346979e-121	1.03199216254102	0.162	0.096	1.90796462649285e-116	Microglia
Wdr76	3.92275099523278e-36	1.03186541986736	0.054	0.032	7.80588220541372e-32	Microglia
Mis12	2.87900180674694e-72	1.03140309347628	0.119	0.074	5.72892569524574e-68	Microglia
Rffl	2.1704035617028e-35	1.03129740087831	0.116	0.086	4.31888604743239e-31	Microglia
Atp6v1c1	9.40863762655412e-243	1.03121905386177	0.283	0.172	1.872224801308e-238	Microglia
Zfp292	0	1.03007408698972	0.409	0.256	0	Microglia
Mycbp2	0	1.02966611055007	0.56	0.328	0	Microglia
Lgals8	7.44633033072006e-168	1.02954583795551	0.21	0.124	1.48174527250999e-163	Microglia
Gnl3	3.8955295794601e-123	1.02913202425079	0.183	0.113	7.75171431016764e-119	Microglia
Gm37494	1.22261384975416e-253	1.02902108711841	0.314	0.195	2.4328792996258e-249	Microglia
Rpl12	0	1.02880198738003	0.886	0.61	0	Microglia
Mkl1	3.10516382117344e-60	1.02836156086726	0.057	0.028	6.17896548775302e-56	Microglia
B3galt6	2.38244458375141e-36	1.02819011407822	0.059	0.035	4.74082647720693e-32	Microglia
Sdccag8	1.06010302682471e-86	1.02790732093717	0.115	0.067	2.1094990130785e-82	Microglia
Smarcd2	8.22500442689811e-100	1.02769770230983	0.109	0.058	1.63669363090845e-95	Microglia
Zc3h8	3.44972217609648e-39	1.02716462000065	0.055	0.032	6.86460215821439e-35	Microglia
Plk3	2.1225763651844e-08	1.02698134220482	0.064	0.053	0.000422371470908045	Microglia
Ino80e	2.97302376301086e-130	1.02674796062225	0.156	0.088	5.91601998601531e-126	Microglia
Ncln	1.27667654494953e-176	1.0252294508348	0.158	0.079	2.54045865679508e-172	Microglia
Zfp157	1.23631869290168e-137	1.02489042476497	0.162	0.091	2.46015056700506e-133	Microglia
Zfp729a	3.97717082837647e-67	1.02483145790035	0.122	0.078	7.91417223138634e-63	Microglia
Vars	1.5351121431555e-100	1.02355264936922	0.121	0.068	3.05471965366514e-96	Microglia
Rnf167	1.62566036120039e-228	1.02339100392157	0.269	0.161	3.23490155275265e-224	Microglia
Zfp467	2.81225258868354e-188	1.02313288491712	0.187	0.1	5.59610142622138e-184	Microglia
Rnf219	6.94462575003585e-49	1.02278126794491	0.079	0.047	1.38191107799963e-44	Microglia
Gm3448	7.93228399540282e-47	1.02267362872083	0.072	0.043	1.57844519224521e-42	Microglia
Scyl3	3.49978428742284e-56	1.02207608132426	0.086	0.051	6.96422075354272e-52	Microglia
Snx6	0	1.02206762359254	0.497	0.312	0	Microglia
Nptn	0	1.0213964422487	0.542	0.312	0	Microglia
Slc35f6	1.4717215399328e-125	1.02119061871457	0.149	0.084	2.92857869231228e-121	Microglia
Zbtb18	0	1.02110715909041	0.327	0.121	0	Microglia
Leprot	5.64740865477884e-274	1.01967625483014	0.337	0.213	1.12377784821444e-269	Microglia
Itga6	0	1.01617574136613	0.661	0.309	0	Microglia
Sh3pxd2a	6.85206689050614e-114	1.01517709878714	0.114	0.059	1.36349279054182e-109	Microglia
Tsr1	1.24934547471564e-37	1.01499745434392	0.054	0.031	2.48607256013665e-33	Microglia
Cltc	0	1.01435170516714	0.714	0.463	0	Microglia
Zfp770	7.56557061572138e-86	1.01420054264257	0.128	0.078	1.5054728968224e-81	Microglia
Fbl	2.86055944783255e-158	1.01312678544992	0.214	0.131	5.69222724524198e-154	Microglia
Bicra	3.48631171683533e-59	1.01288606671286	0.084	0.049	6.93741168533062e-55	Microglia
Arap3	2.12750130299404e-238	1.01256073651638	0.202	0.098	4.23351484282784e-234	Microglia
Pcnx3	1.65288311707129e-112	1.01238282226835	0.135	0.076	3.28907211466016e-108	Microglia
Lamtor4	0	1.01213394925828	0.466	0.288	0	Microglia
2810402E24Rik	5.69682882645062e-40	1.01152065096454	0.068	0.041	1.13361196817541e-35	Microglia
Med7	8.98566531724888e-171	1.01040444651448	0.203	0.118	1.78805754147935e-166	Microglia
Ly6e	0	1.01039212957487	0.86	0.337	0	Microglia
Npm3	4.14385126988178e-65	1.01025048173523	0.098	0.059	8.24584964193776e-61	Microglia
Wdfy1	8.42165670392064e-89	1.01006061644553	0.091	0.047	1.67582546751317e-84	Microglia
Lrif1	9.62636819341188e-157	1.00978092112634	0.234	0.15	1.91555100680703e-152	Microglia
Spcs2	0	1.00944040855749	0.651	0.421	0	Microglia
Plpp1	4.30225937925703e-130	1.00937958590964	0.139	0.074	8.56106593878357e-126	Microglia
Dolpp1	5.57341158583565e-45	1.00933364553167	0.075	0.046	1.10905317146544e-40	Microglia
Ankfy1	3.55396848708381e-231	1.00932176588293	0.253	0.146	7.07204189244808e-227	Microglia
Brat1	5.51042814445308e-45	1.00915428931231	0.075	0.046	1.09652009646472e-40	Microglia
Nudt16	3.00806667654644e-24	1.00763532616473	0.066	0.046	5.98575187965977e-20	Microglia
Selenop	0	1.00752251979033	0.936	0.592	0	Microglia
Vps4b	2.94089277359732e-252	1.00734815104287	0.323	0.208	5.8520825301813e-248	Microglia
Trim41	7.77883374008971e-114	1.00621705308862	0.144	0.082	1.54791012594045e-109	Microglia
Fbxl12	1.13879097751468e-74	1.00618873463852	0.124	0.077	2.26608016615647e-70	Microglia
Atg5	2.09539237111318e-160	1.00598109784565	0.204	0.12	4.16962127927812e-156	Microglia
Ern1	9.00906968117121e-38	1.00353582281625	0.052	0.029	1.79271477585626e-33	Microglia
Zfp646	7.16337124276036e-78	1.00301537878837	0.152	0.1	1.42543924359688e-73	Microglia
Memo1	7.5157110355091e-61	0.99970771848292	0.086	0.05	1.49555133895596e-56	Microglia
Cdkn2aipnl	1.20687276388205e-61	0.999536834873112	0.103	0.064	2.40155611284889e-57	Microglia
Bcap29	1.97236904268613e-212	0.998072640721049	0.238	0.137	3.92481715804114e-208	Microglia
Nup153	2.01157702342925e-121	0.998049798995453	0.166	0.099	4.00283711892187e-117	Microglia
Rlim	3.30481741459914e-177	0.997529608096448	0.237	0.146	6.57625617331084e-173	Microglia
Cant1	3.19838306174377e-114	0.996534631494882	0.15	0.088	6.36446245456392e-110	Microglia
Cdk2ap2	3.23079133718526e-227	0.996128732184999	0.255	0.148	6.42895168186496e-223	Microglia
Med17	7.16589002384174e-94	0.9936183867495	0.142	0.086	1.42594045584427e-89	Microglia
Bst2	0	0.992726418841409	0.447	0.213	0	Microglia
Kdm1b	5.29502603722749e-20	0.992543386623827	0.05	0.034	1.0536572311479e-15	Microglia
Tfpi	3.33916292461063e-162	0.991798536893751	0.131	0.06	6.64460030368269e-158	Microglia
Zfp974	2.5869075703522e-39	0.987612843378513	0.052	0.029	5.14768737424385e-35	Microglia
Mtus1	0	0.987485928039817	0.481	0.281	0	Microglia
Dpagt1	1.37213454135347e-67	0.987355394508956	0.095	0.055	2.73041052383927e-63	Microglia
Zfp518a	7.73521111433816e-95	0.986644350765362	0.175	0.115	1.53922965964215e-90	Microglia
Spopl	3.63622253879546e-122	0.985366274039295	0.175	0.107	7.23571922994909e-118	Microglia
Zyx	2.80547850213161e-104	0.985333549910764	0.155	0.095	5.58262167139168e-100	Microglia
Mex3b	3.62015096245298e-81	0.98473067321657	0.094	0.051	7.20373840018519e-77	Microglia
Emp3	2.08648788999791e-208	0.98470925123707	0.125	0.048	4.15190225230684e-204	Microglia
Prune2	1.22327539135202e-142	0.984564357986441	0.103	0.045	2.43419570125138e-138	Microglia
Slc38a6	7.3880395375258e-90	0.984527143010215	0.096	0.051	1.47014598757226e-85	Microglia
Fnip2	4.66555252609518e-54	0.984278289547927	0.103	0.066	9.2839829716768e-50	Microglia
Lipa	2.06518781874082e-271	0.982033800933908	0.329	0.202	4.10951724051235e-267	Microglia
Acvr1	3.09463498499447e-119	0.981196398331523	0.139	0.077	6.1580141566405e-115	Microglia
Cdk9	3.80883211661944e-263	0.980783645127186	0.25	0.135	7.57919502886103e-259	Microglia
Btbd9	7.06116538493857e-128	0.979831833859248	0.136	0.073	1.40510129994893e-123	Microglia
Rpl39	0	0.979244910871164	0.929	0.689	0	Microglia
Gabpb1	9.96530824432565e-76	0.97898717758078	0.101	0.058	1.98299668753836e-71	Microglia
Eif4e2	1.73664078091986e-206	0.978713187981231	0.268	0.166	3.45574148995242e-202	Microglia
Chd7	5.66292377535335e-302	0.976283158495334	0.327	0.195	1.12686520205756e-297	Microglia
Sgpp1	3.19156852926541e-106	0.976204505718537	0.167	0.104	6.35090221638523e-102	Microglia
Slc31a2	3.14283400546302e-81	0.975402735674094	0.141	0.089	6.25392538747086e-77	Microglia
Gpr107	1.01892116474841e-186	0.974092580304295	0.224	0.131	2.02755122573287e-182	Microglia
Zc3hav1	2.64157680862712e-164	0.974021037529817	0.167	0.087	5.25647369148711e-160	Microglia
Cntrl	1.06492066870095e-147	0.972449614796867	0.176	0.1	2.11908563864803e-143	Microglia
Atp13a1	4.13752932340045e-91	0.972352517534689	0.116	0.066	8.23326960063456e-87	Microglia
Ccni	0	0.972270637531116	0.449	0.278	0	Microglia
Srrd	1.12018162957663e-80	0.972221582575905	0.083	0.043	2.22904942469453e-76	Microglia
Tmem243	1.58980985885283e-231	0.97066424659517	0.281	0.169	3.16356263813124e-227	Microglia
Scamp5	5.80735150399991e-161	0.970294166813777	0.208	0.125	1.15560487578094e-156	Microglia
Supt3	2.17445473368524e-52	0.969152546040406	0.08	0.047	4.32694747456026e-48	Microglia
Ftl1	0	0.969123506094272	0.912	0.669	0	Microglia
Ak2	1.57273904973823e-122	0.967314041322577	0.191	0.121	3.1295934350741e-118	Microglia
Rmnd1	3.66181418691867e-79	0.967229942077033	0.11	0.064	7.28664405054946e-75	Microglia
Mcl1	0	0.966978155704993	0.602	0.354	0	Microglia
Sipa1l1	0	0.966752334933951	0.223	0.098	0	Microglia
Clp1	3.52473006972689e-34	0.966331401003747	0.058	0.035	7.01386036574954e-30	Microglia
1110019D14Rik	3.89822999313878e-35	0.96417423375056	0.052	0.03	7.75708786334686e-31	Microglia
Zfyve26	1.98225631862174e-54	0.962297363967984	0.114	0.075	3.9444918484254e-50	Microglia
Minpp1	7.53889851643662e-73	0.962125990456901	0.12	0.074	1.50016541578572e-68	Microglia
Rps11	0	0.961108801816263	0.928	0.679	0	Microglia
Anapc15	3.95111698600044e-53	0.960950729843519	0.071	0.04	7.86232769044229e-49	Microglia
Rps4x	0	0.958380766628472	0.925	0.673	0	Microglia
Trmt112	9.15535929098078e-258	0.958044212202238	0.329	0.21	1.82182494531227e-253	Microglia
Zfp143	2.71900962498122e-32	0.957641205096067	0.069	0.045	5.41055725275013e-28	Microglia
Tmem230	7.70906614504864e-102	0.95754180831622	0.169	0.108	1.53402707220323e-97	Microglia
Rplp1	0	0.956141177906032	0.98	0.818	0	Microglia
Dclre1b	1.05938951651424e-16	0.955187807745961	0.052	0.037	2.10807919891169e-12	Microglia
Zfx	2.96609350044449e-171	0.954974556964627	0.237	0.146	5.9022294565345e-167	Microglia
Slc25a11	7.19879277220854e-275	0.954480153177611	0.298	0.175	1.43248777374178e-270	Microglia
Polr3f	7.33455642880358e-83	0.954110674014994	0.137	0.085	1.45950338376763e-78	Microglia
Camkk2	7.65428839921557e-242	0.954029290883319	0.151	0.062	1.52312684855991e-237	Microglia
Vac14	3.95170785867695e-49	0.953791735781011	0.08	0.049	7.86350346798126e-45	Microglia
Smc2	2.59534732078172e-13	0.952537557075271	0.082	0.066	5.16448163362355e-09	Microglia
Traf2	1.87651534798565e-38	0.95245241386046	0.055	0.032	3.73407789095664e-34	Microglia
Med13l	6.85135040417691e-271	0.950999092622821	0.3	0.177	1.36335021692716e-266	Microglia
Coro1b	3.46945203667317e-211	0.950786725972199	0.257	0.154	6.90386260777594e-207	Microglia
Kat6a	0	0.950656209532506	0.4	0.261	0	Microglia
Mia2	5.0574036734564e-277	0.950031014162756	0.359	0.235	1.00637275698109e-272	Microglia
Fbxl4	3.10965274726833e-30	0.949130989310297	0.05	0.03	6.18789800178924e-26	Microglia
Pes1	1.03101577117259e-62	0.949115828886952	0.112	0.071	2.05161828305633e-58	Microglia
Cpsf3	1.78618837854655e-114	0.948078471812764	0.158	0.094	3.55433625446977e-110	Microglia
Ftl1-ps1	2.52332062097784e-55	0.947875474913783	0.069	0.038	5.02115570368381e-51	Microglia
Tbl1xr1	9.90790418519314e-207	0.94630155821832	0.271	0.169	1.97157385381158e-202	Microglia
Trim12c	7.14116610971475e-135	0.946022591142691	0.16	0.088	1.42102064417214e-130	Microglia
Tap2	1.24732273401177e-193	0.944964254603847	0.204	0.11	2.48204750841003e-189	Microglia
Pld3	7.34249960837939e-221	0.944514706659167	0.207	0.107	1.46108399707142e-216	Microglia
Zfp868	2.21186754870751e-25	0.944457074160938	0.051	0.033	4.40139523517307e-21	Microglia
Cdk2	1.45154179125746e-45	0.944214595843135	0.055	0.03	2.88842301042322e-41	Microglia
Casd1	6.17800249011866e-184	0.944194015565939	0.235	0.141	1.22936071550871e-179	Microglia
Brd1	1.14190134708697e-305	0.943613352974306	0.385	0.252	2.27226949056837e-301	Microglia
Pdgfb	0	0.943148575929179	0.419	0.187	0	Microglia
Unk	4.98523075531959e-54	0.942566651539543	0.083	0.049	9.92011068001046e-50	Microglia
Peli1	0	0.942517402726605	0.399	0.252	0	Microglia
Rgl2	7.96109908245387e-226	0.942502530262464	0.182	0.087	1.5841791064175e-221	Microglia
Clptm1l	4.6480337763349e-221	0.942444527893396	0.277	0.17	9.24912241152882e-217	Microglia
Zc3h7a	9.71426476141777e-272	0.941148664329873	0.273	0.152	1.93304154487452e-267	Microglia
Gatc	1.58664885550884e-53	0.939815667011347	0.077	0.045	3.15727255757704e-49	Microglia
Tmem106c	7.05974450812477e-78	0.937687932598703	0.11	0.065	1.40481855967175e-73	Microglia
Tex261	2.47636573074889e-237	0.936876950227268	0.315	0.202	4.92772016761722e-233	Microglia
Mdc1	8.24250493567502e-42	0.935639686697275	0.089	0.059	1.64017605714997e-37	Microglia
Zfp595	1.89509097396007e-28	0.934945575807903	0.06	0.039	3.77104152908315e-24	Microglia
Wdr46	1.06714891463017e-19	0.934735370201479	0.054	0.038	2.12351962522257e-15	Microglia
Ttc28	0	0.934672136956581	0.341	0.187	0	Microglia
Supt20	1.08189911221076e-213	0.934455292522906	0.269	0.163	2.1528710433882e-209	Microglia
Gak	6.32402857312914e-117	0.933658805180233	0.17	0.103	1.25841844576697e-112	Microglia
Ccng1	3.71630355637304e-122	0.932445595055853	0.187	0.117	7.39507244682672e-118	Microglia
Grap	0	0.931459199316293	0.277	0.137	0	Microglia
Spidr	9.76580224278539e-35	0.930844521966954	0.066	0.041	1.94329698829186e-30	Microglia
Mvb12b	3.11612996656493e-143	0.930340592399362	0.195	0.118	6.20078702046755e-139	Microglia
Rbm26	0	0.929270425082182	0.37	0.227	0	Microglia
Trmt1l	7.72334232341648e-148	0.928813866427259	0.184	0.106	1.53686788893665e-143	Microglia
Tti1	1.32512725450464e-23	0.928556825098349	0.052	0.034	2.63687072373878e-19	Microglia
BC002059	2.02982002184298e-36	0.928043578320037	0.06	0.036	4.03913886146534e-32	Microglia
Aatf	1.43140969978082e-48	0.92798152287913	0.098	0.064	2.84836216159386e-44	Microglia
Rbfa	1.32537560463496e-98	0.92696989647839	0.135	0.079	2.6373649156631e-94	Microglia
Rpn2	0	0.926574415550288	0.512	0.315	0	Microglia
Smg1	0	0.926349857239305	0.324	0.185	0	Microglia
Rpl10-ps3	4.24875812203976e-51	0.926026144778016	0.063	0.034	8.45460378704692e-47	Microglia
Rcc2	2.16715039436607e-153	0.925478718491617	0.158	0.084	4.31241256974904e-149	Microglia
Rlf	5.57276863068486e-148	0.924652994421914	0.238	0.156	1.10892522981998e-143	Microglia
Slc9a1	6.86252265937783e-67	0.924408290377988	0.081	0.044	1.3655733839896e-62	Microglia
Cux1	1.36635426515498e-302	0.924330895987978	0.365	0.231	2.7189083522319e-298	Microglia
Pias1	4.1958525073771e-218	0.923472106634607	0.272	0.165	8.34932690442969e-214	Microglia
Prkca	5.68451494655309e-160	0.922636507131636	0.198	0.116	1.1311616292146e-155	Microglia
Scaf11	0	0.922590467940414	0.533	0.351	0	Microglia
Ripk1	7.44554724684852e-109	0.921619360257477	0.156	0.092	1.48158944665039e-104	Microglia
Sbf2	6.81814658017354e-224	0.921423412317625	0.296	0.187	1.35674298798873e-219	Microglia
Asnsd1	3.08409588855818e-38	0.921134747876868	0.077	0.049	6.13704240864192e-34	Microglia
Ccdc71	1.22410431017713e-41	0.920784800122999	0.08	0.051	2.43584516682147e-37	Microglia
Lig1	2.48686411170113e-17	0.920398367486145	0.052	0.037	4.94861089587407e-13	Microglia
Uhrf2	2.56536524008272e-207	0.920320253267481	0.297	0.193	5.10482029124061e-203	Microglia
Trmt13	1.065635473647e-63	0.919361826558947	0.15	0.104	2.12050802901017e-59	Microglia
Ago1	4.55858508549385e-132	0.918961821599842	0.198	0.124	9.07112846162422e-128	Microglia
Oxld1	7.668145010271e-35	0.918541787574246	0.056	0.033	1.52588417559383e-30	Microglia
Scarb2	0	0.918251100021187	0.5	0.311	0	Microglia
Khdrbs3	2.70172996254357e-281	0.918242992981289	0.21	0.098	5.37617245246546e-277	Microglia
Gps2	2.12116489650892e-98	0.918103765276871	0.176	0.115	4.2209060275631e-94	Microglia
Cdc42	0	0.917589684062083	0.855	0.586	0	Microglia
Ddx21	5.01150091064029e-141	0.917258931688568	0.222	0.141	9.9723856620831e-137	Microglia
Alg1	6.09662643086713e-68	0.917181875680726	0.108	0.066	1.21316769347825e-63	Microglia
1600012H06Rik	1.1409109601078e-65	0.917164972107433	0.127	0.082	2.27029871951852e-61	Microglia
Parp2	3.65984191796527e-77	0.916522362342228	0.119	0.072	7.28271943255909e-73	Microglia
Dck	7.92641358425289e-62	0.915695324739015	0.061	0.03	1.57727703913048e-57	Microglia
Surf4	5.32118995629122e-243	0.915211678623198	0.3	0.185	1.05886358940239e-238	Microglia
Slc7a6os	6.4883397557058e-35	0.914953278897775	0.068	0.043	1.2911147279879e-30	Microglia
Snrnp35	5.03808276578937e-23	0.914803603642318	0.056	0.038	1.00252808956443e-18	Microglia
Fbxo33	2.99156837287481e-77	0.912881519444327	0.109	0.064	5.95292190518358e-73	Microglia
Ddx18	4.7758989932522e-157	0.912105354182509	0.245	0.158	9.50356140667256e-153	Microglia
Dguok	5.40764217396337e-143	0.912062922941964	0.239	0.158	1.07606671619697e-138	Microglia
Zfp934	5.22952587482001e-42	0.91100005237645	0.061	0.035	1.04062335383043e-37	Microglia
Ankrd49	1.60859437999875e-57	0.910796735184377	0.135	0.093	3.20094195675951e-53	Microglia
Rsbn1	2.18453984262079e-162	0.9095268870843	0.232	0.145	4.34701583283111e-158	Microglia
Zbtb14	1.92298740937347e-44	0.909034006764119	0.078	0.049	3.82655264591227e-40	Microglia
Cmas	1.00032288142781e-107	0.90900042884127	0.152	0.09	1.99054250175319e-103	Microglia
Mtif3	6.38364775562241e-40	0.907688431443517	0.09	0.06	1.2702820668913e-35	Microglia
Mto1	1.84793119572641e-44	0.907559126391456	0.08	0.05	3.67719828637598e-40	Microglia
Plekhf2	3.60113508191391e-197	0.907401418930589	0.202	0.108	7.16589869950048e-193	Microglia
Tmem199	1.89329308683074e-52	0.907274621293385	0.125	0.086	3.76746391348448e-48	Microglia
Wnk1	0	0.906736738966224	0.712	0.443	0	Microglia
Ptp4a2	0	0.904636649238744	0.562	0.364	0	Microglia
Pip4k2b	1.27009411133478e-112	0.904236562700828	0.129	0.071	2.52736027214508e-108	Microglia
Mars	1.69292426229051e-64	0.904034741679701	0.108	0.066	3.36874998953189e-60	Microglia
Vkorc1	1.14402686763109e-113	0.903464577140259	0.222	0.153	2.2764990638991e-109	Microglia
Smg8	2.21547777356642e-25	0.900996760388061	0.052	0.034	4.40857922161981e-21	Microglia
Ap3b1	4.11516055927375e-137	0.899859615477226	0.214	0.136	8.18875799689884e-133	Microglia
Ccdc152	1.71601781300591e-60	0.899511128593984	0.067	0.035	3.41470384610047e-56	Microglia
Dhx33	1.23382203352825e-74	0.899256827032475	0.069	0.034	2.45518246451786e-70	Microglia
Phf13	3.67975707933159e-32	0.898980611824762	0.05	0.03	7.32234861216192e-28	Microglia
Myadm	8.94184540649682e-194	0.898557672151147	0.194	0.101	1.7793378174388e-189	Microglia
Trio	0	0.898467247415471	0.295	0.147	0	Microglia
Gm26518	1.50748033144034e-27	0.89804065960593	0.056	0.036	2.99973511153312e-23	Microglia
Dmtf1	2.80003605344583e-198	0.897569233181804	0.268	0.167	5.57179174275186e-194	Microglia
Vgll4	3.50387471453313e-191	0.897371822782576	0.315	0.216	6.97236029444948e-187	Microglia
Ints12	1.5895619568523e-41	0.897251009552323	0.072	0.044	3.16306933794039e-37	Microglia
Slc23a2	1.50679578041062e-159	0.897202249499446	0.178	0.098	2.99837292343909e-155	Microglia
Ube2f	1.53966075083428e-112	0.896206845858947	0.177	0.111	3.06377092808512e-108	Microglia
Lemd2	1.38354371277587e-101	0.896147827426686	0.15	0.091	2.75311363405271e-97	Microglia
Irak2	8.28017606493081e-183	0.895950751066038	0.185	0.097	1.64767223516058e-178	Microglia
Gpr108	1.1633989080447e-71	0.895716524738116	0.139	0.091	2.31504748711815e-67	Microglia
Mrps18b	2.6294867017009e-66	0.894690881744594	0.107	0.065	5.23241558771462e-62	Microglia
Fus	0	0.893084225836593	0.717	0.497	0	Microglia
Atf6	2.87785303371433e-92	0.892743478579664	0.175	0.117	5.72663975178814e-88	Microglia
Rabep2	2.25422607877468e-24	0.892620094999102	0.057	0.038	4.48568447415373e-20	Microglia
Sptlc2	5.44485299555796e-141	0.892405229654636	0.263	0.181	1.08347129758608e-136	Microglia
Ptp4a3	0	0.892350352948399	0.314	0.157	0	Microglia
Filip1l	0	0.892041903292216	0.285	0.092	0	Microglia
Spsb2	4.48720757706844e-91	0.891581543080169	0.098	0.051	8.92909435760849e-87	Microglia
P4hb	0	0.89064349642188	0.445	0.3	0	Microglia
Tor1a	6.93343309154303e-95	0.889959050421709	0.18	0.12	1.37968385088615e-90	Microglia
Atp6ap1	0	0.889873649951152	0.428	0.274	0	Microglia
Srm	1.12615640576417e-79	0.889674550830486	0.121	0.074	2.24093863183013e-75	Microglia
Creb1	5.50099202050234e-178	0.88885236356482	0.299	0.203	1.09464240215976e-173	Microglia
Taf15	7.51144410022888e-234	0.888472125983428	0.336	0.223	1.49470226150455e-229	Microglia
Larp4b	2.20938789902225e-251	0.888035635653265	0.334	0.215	4.39646098026438e-247	Microglia
Cyp4f13	1.153439702545e-67	0.88723630500257	0.101	0.06	2.29522966409429e-63	Microglia
Tmem140	4.83156048801882e-134	0.887016706956579	0.161	0.089	9.61432221510866e-130	Microglia
Rplp0	0	0.88665319557971	0.862	0.605	0	Microglia
M6pr	0	0.886148586376795	0.406	0.267	0	Microglia
Dedd	5.81605933645737e-59	0.885624601907692	0.128	0.086	1.15733764736165e-54	Microglia
Utp3	8.45503835936082e-137	0.884690837377018	0.24	0.16	1.68246808312921e-132	Microglia
Ppt2	1.46270803378778e-79	0.884461416802235	0.131	0.081	2.91064271643431e-75	Microglia
Irf1	1.57182382065431e-93	0.883906733927827	0.117	0.065	3.12777222072e-89	Microglia
Lman1	0	0.883109638818141	0.372	0.221	0	Microglia
Ppp4r1	1.78637399286127e-47	0.88295609952254	0.096	0.062	3.55470560839464e-43	Microglia
Mfsd5	2.0339350374255e-68	0.882554565342876	0.125	0.08	4.04732733097299e-64	Microglia
Gpd1l	5.50237306178612e-64	0.881986492576706	0.102	0.062	1.09491721556482e-59	Microglia
Clk1	0	0.881836505913079	0.521	0.335	0	Microglia
Foxn3	0	0.881305591605977	0.557	0.319	0	Microglia
Zfp110	2.27936952014529e-42	0.880873702228369	0.129	0.094	4.53571740813711e-38	Microglia
Lims1	0	0.880842427507402	0.489	0.304	0	Microglia
Imp4	2.43524797857684e-75	0.880734465959694	0.164	0.112	4.84589995257005e-71	Microglia
Snx13	2.20968690326334e-171	0.880444947406228	0.249	0.157	4.39705596880373e-167	Microglia
Cul1	3.65287529530979e-303	0.880141385976243	0.405	0.273	7.26885655013696e-299	Microglia
Ergic3	0	0.87993344043991	0.404	0.253	0	Microglia
Fam53b	3.20310863175144e-84	0.879923567338994	0.194	0.136	6.3738658663222e-80	Microglia
St3gal2	3.84052318622516e-151	0.878430489576998	0.163	0.088	7.64225708826945e-147	Microglia
Etaa1	1.71388891363333e-41	0.877821355327328	0.085	0.055	3.41046754923895e-37	Microglia
Atp2c1	0	0.877709461731779	0.454	0.304	0	Microglia
Canx	0	0.876411227666466	0.763	0.529	0	Microglia
Ttc9c	1.48971034187354e-73	0.876235961504791	0.126	0.079	2.96437460929415e-69	Microglia
Naa40	5.07705403501005e-33	0.876207913100408	0.069	0.045	1.01028298242665e-28	Microglia
Lrp5	1.00033175933662e-100	0.875783017447154	0.115	0.062	1.99056016790393e-96	Microglia
Pigx	7.18179866493525e-140	0.875768147020101	0.169	0.096	1.42910611633547e-135	Microglia
Arl8b	3.31909938813326e-282	0.87568339971928	0.366	0.239	6.60467587244637e-278	Microglia
Ube2i	1.02082410553337e-276	0.875660950308519	0.374	0.246	2.03133788760085e-272	Microglia
Wwp2	9.2067466303815e-47	0.8752380461678	0.108	0.073	1.83205051197961e-42	Microglia
Rragc	7.29157436562653e-103	0.874322649757724	0.209	0.144	1.45095038301602e-98	Microglia
Wdr3	8.78039452287278e-56	0.873517950509317	0.095	0.059	1.74721070610645e-51	Microglia
Spg21	2.14931863993038e-77	0.873160866660452	0.148	0.097	4.27692916159746e-73	Microglia
Nop16	7.29173062233655e-23	0.873112250390614	0.074	0.053	1.45098147653875e-18	Microglia
Slc30a7	1.11146919839927e-85	0.871899899598942	0.113	0.064	2.21171255789471e-81	Microglia
Phospho2	4.61250943987007e-52	0.871792926660818	0.101	0.065	9.17843253439745e-48	Microglia
Rsbn1l	8.36264182082239e-240	0.871473374366426	0.332	0.214	1.66408209592545e-235	Microglia
Fam208b	5.9962525533152e-118	0.871185526098463	0.202	0.131	1.19319429558419e-113	Microglia
Rplp2	0	0.871057099515019	0.887	0.647	0	Microglia
Prrc1	7.29736177847288e-55	0.870501364514231	0.116	0.077	1.45210202029832e-50	Microglia
Chst15	1.3908701770515e-43	0.869920297133381	0.051	0.027	2.76769256531478e-39	Microglia
Zfp800	5.99460190021141e-85	0.869198718851572	0.197	0.14	1.19286583212307e-80	Microglia
Pak2	0	0.868888048029904	0.521	0.353	0	Microglia
Ccz1	2.29575859790687e-103	0.867801361125439	0.197	0.132	4.56833003397487e-99	Microglia
Zcchc6	0	0.867651128774495	0.413	0.271	0	Microglia
Dnajb1	2.37402987827812e-53	0.867007726223198	0.162	0.12	4.72408205478562e-49	Microglia
Prr14l	1.56640894886869e-83	0.866809782622644	0.157	0.103	3.1169971673538e-79	Microglia
Borcs6	1.36398385824623e-59	0.865702550517327	0.118	0.077	2.71419147952417e-55	Microglia
Itm2c	0	0.865197279626569	0.672	0.403	0	Microglia
Trmt6	8.02552480411701e-41	0.86515658259122	0.101	0.07	1.59699918077124e-36	Microglia
Lsm10	2.21870228517074e-90	0.864975046847194	0.134	0.081	4.41499567726126e-86	Microglia
Slc35b3	1.48599480756789e-45	0.864841621201664	0.083	0.052	2.95698106757935e-41	Microglia
Rfx5	2.81363388152373e-43	0.864575216460318	0.056	0.032	5.59885006084407e-39	Microglia
9530068E07Rik	3.4099193557203e-156	0.864432382822423	0.249	0.162	6.78539852594783e-152	Microglia
Rhno1	3.80700865578993e-32	0.864427791664204	0.073	0.048	7.57556652415638e-28	Microglia
Tyw1	6.55787080064638e-36	0.86415682204621	0.076	0.05	1.30495071062062e-31	Microglia
Leprotl1	6.38528061403601e-152	0.863615964014452	0.28	0.194	1.27060698938702e-147	Microglia
Wls	0	0.863332912852289	0.379	0.239	0	Microglia
Acvr1b	1.12941881349089e-52	0.863113077476633	0.052	0.026	2.24743049696552e-48	Microglia
Map3k2	9.31500033133801e-161	0.862824727514704	0.236	0.148	1.85359191593295e-156	Microglia
Atxn7l1	4.34937325043262e-85	0.861190386293733	0.108	0.06	8.65481783103586e-81	Microglia
Osgep	2.80051052191851e-189	0.861188100688654	0.254	0.157	5.57273588756565e-185	Microglia
Tnip2	2.55060885633074e-45	0.860637740169801	0.072	0.043	5.07545656321254e-41	Microglia
Myo9b	8.24427125840178e-80	0.859573313008978	0.121	0.073	1.64052753770937e-75	Microglia
Rpl10a	0	0.859194505845364	0.786	0.546	0	Microglia
Ilvbl	2.59717647443992e-46	0.857169042091944	0.149	0.111	5.16812146648799e-42	Microglia
Lpin1	1.37829345240691e-123	0.856726606274553	0.165	0.097	2.74266614094451e-119	Microglia
Cpsf2	4.06798878575869e-78	0.856400429094488	0.157	0.105	8.09489088478122e-74	Microglia
Mri1	3.55178449535081e-33	0.855330410325469	0.075	0.049	7.06769596729858e-29	Microglia
Bin3	1.94554422755696e-36	0.854982244633544	0.077	0.05	3.87143845841559e-32	Microglia
Chkb	3.43512738494484e-41	0.854958321794272	0.066	0.039	6.83555998330174e-37	Microglia
Slc17a5	5.70645799561409e-51	0.85484011540538	0.105	0.068	1.13552807654725e-46	Microglia
Nsmaf	4.33499337110232e-103	0.854681304912063	0.134	0.077	8.6262033091565e-99	Microglia
Gm10073	2.96743171448781e-68	0.854447550045776	0.083	0.046	5.90489236865929e-64	Microglia
[truncated: 27,216 more rows]

## Sheet: 2 wk microglia
gene	p_val	avg_log2FC	pct.1	pct.2	p_val_adj	cluster				Cluster	BaselineProp.Freq	PropMean.SH	PropMean.IR	PropRatio	Tstatistic	P.Value	FDR
Mobp	2.73169490711709e-29	1.00085910848867	0.161	0.106	5.43579969567231e-25	0				7	0.0398063136712363	0.00470030288791961	0.0757422740042819	0.0620565324940454	-21.5166020469138	1.19327124915774e-06	1.12981752535561e-05
Mbp	1.31211063624536e-53	0.976602668262542	0.347	0.265	2.61096895506464e-49	0				9	0.0196201735630738	0.00138125974580085	0.0380704192142295	0.0362817056998569	-19.5272318867718	2.05421368246475e-06	1.12981752535561e-05
Csmd3	8.75760501965235e-40	0.831371842269952	0.336	0.275	1.74267582286062e-35	0				6	0.0447113570620048	0.00629922923819667	0.0835959176900721	0.0753533116479535	-15.9849687808279	6.27177836712987e-06	2.29965206794762e-05
Nav3	2.28206733936165e-64	0.558150659011624	0.597	0.537	4.54108579859575e-60	0				10	0.0125141491636272	0.000850939350907242	0.0244324040115297	0.0348283104071823	-12.7040335214053	2.23412542497942e-05	6.14384491869341e-05
Rsrp1	1.18595231110157e-230	0.548960100792021	0.932	0.842	2.35992650386102e-226	0				0	0.388127279587473	0.701437183092154	0.0670045850205203	10.4684952959165	11.7208340697415	3.47496139146841e-05	7.64491506123051e-05
Abca9	1.35694450473315e-78	0.530494630327491	0.663	0.602	2.70018386996849e-74	0				4	0.069110803672494	0.029185467397591	0.108993343997663	0.267772932980356	-9.24713785291821	0.000125520805590043	0.000230121476915079
Hpgd	5.82180229425344e-96	0.486526669959445	0.746	0.688	1.15848043853349e-91	0				8	0.0367878254307634	0.0554337656661658	0.0174510895478033	3.17652175896054	5.96276054940501	0.00122577383711675	0.0019262160297549
Tmem176a	7.86335812586653e-45	0.473946545267241	0.518	0.462	1.56472963346618e-40	0				2	0.0989812602188404	0.129060623783049	0.0689442542593754	1.87195619373168	5.36101548383457	0.00206858640278394	0.00284430630382792
Tmem176b	2.72315067025678e-69	0.446283613501885	0.695	0.64	5.41879751874397e-65	0				1	0.163941642560684	0.0127592331221392	0.310764791824283	0.0410575247190606	-5.27615489794296	0.00296757194077408	0.00362703237205721
Ccl9	6.50094664495123e-31	0.431488290038465	0.4	0.343	1.29362337287884e-26	0				5	0.0448371274053578	0.0569079934181054	0.0320389271805617	1.7762140753774	4.12587420806066	0.00698804211362722	0.00768684632498995
Nrip1	1.64289923716143e-65	0.409457350723771	0.767	0.711	3.26920519202754e-61	0				3	0.0815620676644447	0.00198400229797118	0.17296199324968	0.0114707414079529	-2.73321005362165	0.0398046342583615	0.0398046342583615
Gpr34	2.73984245926265e-169	0.401950642131436	0.975	0.91	5.45201250968675e-165	0
Hpgds	1.11024617480749e-88	0.399926414646839	0.849	0.794	2.20927886324942e-84	0
Srgap2	1.53293866188348e-76	0.37210681100106	0.842	0.784	3.05039464328194e-72	0
Tgfbr1	3.04353022538196e-113	0.370029391475755	0.944	0.877	6.05632079548756e-109	0
Vsir	3.94381013790022e-111	0.363051790897553	0.931	0.861	7.84778779340765e-107	0
Plxdc2	4.87262873845576e-81	0.354057843284163	0.873	0.815	9.69604392665312e-77	0
Zfhx3	5.2165290558815e-71	0.331104538877586	0.876	0.809	1.03803711682986e-66	0
Siglech	6.76965438289e-120	0.326527536790836	0.962	0.904	1.34709352565128e-115	0
Pmepa1	2.9376485066748e-50	0.317700238810696	0.785	0.735	5.84562676343218e-46	0
Arhgap5	5.7444359268191e-72	0.306634572996548	0.913	0.836	1.14308530507773e-67	0
Matn1	9.60598190869713e-107	2.62419112208928	0.075	0.009	1.91149434001164e-102	1
D630023F18Rik	2.55486898239194e-151	2.23558925549822	0.125	0.02	5.08393378806172e-147	1
Phlda3	5.53773736625012e-274	2.14126574185739	0.25	0.046	1.10195435851011e-269	1
Fam212b	2.17728560197138e-168	2.11771303050094	0.164	0.031	4.33258061936284e-164	1
Gm42047	1.81234404225225e-122	1.64923220136113	0.157	0.039	3.60638340967774e-118	1
Cdkn1a	0	1.64636435621902	0.757	0.227	0	1
Bbc3	3.00797879341897e-206	1.55291309379038	0.275	0.07	5.9855770010244e-202	1
Mmp2	6.68652342645531e-132	1.49596195740556	0.203	0.058	1.33055129663034e-127	1
Trp53inp1	1.71899692972007e-184	1.33686198049768	0.32	0.099	3.42063199044997e-180	1
Epha2	1.30424592201928e-135	1.3286053143634	0.239	0.075	2.59531896022616e-131	1
Sesn2	3.91717969200298e-70	1.26041140260256	0.122	0.037	7.79479586911673e-66	1
Sulf2	1.5518451456042e-100	1.21337916358789	0.194	0.064	3.08801665523779e-96	1
Mgmt	1.53441093222728e-83	1.18707419601264	0.141	0.043	3.05332431403907e-79	1
Pvt1	2.42196858077055e-82	1.1207626639803	0.161	0.053	4.81947527887532e-78	1
Gm26870	3.23308335300086e-42	1.06290579534506	0.138	0.06	6.4335125641364e-38	1
Glipr1	1.58328767979058e-110	1.04756549325313	0.242	0.086	3.15058415401528e-106	1
Aen	1.6089850116664e-93	1.01901909970707	0.196	0.067	3.20171927471497e-89	1
Lrrc28	4.68347013215545e-41	1.01334821147363	0.085	0.029	9.31963721597613e-37	1
H2-Q7	3.01982498766019e-54	0.958428231907931	0.126	0.046	6.009149742945e-50	1
Exoc4	2.47280972393025e-174	0.94801234663112	0.497	0.209	4.92064406964881e-170	1
Ak1	1.04720581423402e-131	0.947395801846627	0.305	0.112	2.08383484974428e-127	1
Ccng1	4.14492802979446e-168	0.944148859614677	0.395	0.147	8.24799228648799e-164	1
Bax	7.31523091853345e-234	0.932359210220018	0.711	0.329	1.45565780047897e-229	1
Trpm2	1.82125780817093e-125	0.912795898006965	0.329	0.128	3.62412091247934e-121	1
Lrrc25	3.555584219475e-150	0.883578050890311	0.422	0.17	7.07525703833331e-146	1
Mrc1	1.05709187286623e-57	0.873213729099023	0.188	0.081	2.1035071178165e-53	1
Map3k20	1.29268157013302e-58	0.820835916467001	0.159	0.063	2.57230705640771e-54	1
Ephx1	6.7664478129969e-45	0.806076573986555	0.117	0.045	1.34645545030825e-40	1
Dcxr	1.08997869914624e-107	0.793016673643006	0.298	0.119	2.16894861343111e-103	1
Gas6	4.68744050509759e-147	0.780695601844919	0.649	0.336	9.3275378610937e-143	1
Dab2	4.72462674284776e-68	0.778297276512913	0.216	0.092	9.40153475559276e-64	1
Gm26740	5.25668708061085e-89	0.775981670849685	0.278	0.117	1.04602816217075e-84	1
Lgals3bp	5.19287779437666e-192	0.749003804873166	0.673	0.319	1.03333075230301e-187	1
H2-D1	5.50960751744264e-152	0.744144039195807	0.861	0.575	1.09635679989591e-147	1
H2-K1	1.52607451626499e-156	0.733561619537278	0.862	0.569	3.0367356799157e-152	1
Hdac4	1.94805047610549e-54	0.726630669073905	0.159	0.065	3.87642564240232e-50	1
Tap1	3.16480991309476e-85	0.718277770719936	0.296	0.13	6.29765524606726e-81	1
Pxdc1	3.97599955851134e-52	0.715320576410704	0.148	0.06	7.91184152148171e-48	1
Pgpep1	1.22451228745845e-49	0.71000891261913	0.131	0.051	2.43665700081357e-45	1
Mdm2	3.39481795329714e-96	0.704315768374566	0.346	0.155	6.75534824526599e-92	1
Baiap2	9.64292801457032e-32	0.700828592746738	0.094	0.039	1.91884624561935e-27	1
Foxo3	7.59285107916608e-88	0.700181236823252	0.271	0.112	1.51090143624326e-83	1
C5ar1	3.76592988297142e-104	0.699620467107171	0.358	0.157	7.49382387412482e-100	1
Hist1h2ac	7.28221455326104e-35	0.69491925731108	0.131	0.06	1.44908787395341e-30	1
Pla2g4a	1.00388448125797e-133	0.694552222723365	0.537	0.254	1.99762972925524e-129	1
Slfn2	1.70547898226785e-116	0.667060996740941	0.423	0.193	3.3937326268148e-112	1
Nuak2	6.01137709209303e-32	0.657351934662048	0.106	0.046	1.19620392755559e-27	1
Ccnd1	1.5427217344966e-136	0.656307588897272	0.682	0.368	3.06986197947479e-132	1
Ninl	1.94297192307975e-29	0.653044575219415	0.091	0.039	3.86631982973639e-25	1
H2-M3	5.23850953541864e-93	0.651592436134966	0.332	0.147	1.04241101245295e-88	1
Alox5	1.04803978242976e-51	0.648170808511067	0.157	0.065	2.08549436305698e-47	1
Acvrl1	4.39671671330442e-44	0.647771531663024	0.141	0.061	8.74902658780447e-40	1
Gm5431	9.73361414224877e-30	0.643602736243861	0.095	0.041	1.93689187816608e-25	1
Lacc1	1.18641698919932e-110	0.641986480921683	0.592	0.317	2.36085116680773e-106	1
Def6	1.16724840307407e-36	0.638405624522524	0.121	0.052	2.32270759727709e-32	1
Jdp2	2.90041021365414e-32	0.634824961465811	0.087	0.035	5.77152628415038e-28	1
Gal3st4	7.00702368660462e-43	0.633336248023899	0.123	0.05	1.39432764339745e-38	1
Zmat3	2.50269934204224e-33	0.616794712008068	0.112	0.049	4.98012142072985e-29	1
Slamf9	7.77105322958736e-63	0.615568149523504	0.263	0.125	1.54636188215559e-58	1
Aaed1	1.02824759793328e-77	0.609943233127823	0.279	0.124	2.04610989512743e-73	1
Rnf169	5.56286593515576e-69	0.604795591980671	0.266	0.122	1.10695469243664e-64	1
Gbp7	3.50405752481358e-88	0.592427695349981	0.415	0.206	6.97272406862654e-84	1
Polk	7.76681983396089e-41	0.589302299468747	0.154	0.07	1.54551947875988e-36	1
Hspa1b	2.97869340977106e-26	0.57680331622024	0.132	0.068	5.92730201610343e-22	1
Csf2ra	3.9279244724785e-86	0.567354903745635	0.382	0.184	7.81617690778497e-82	1
Fam129a	3.80237036763494e-34	0.563467661032743	0.142	0.068	7.56633679455676e-30	1
Irs2	3.51840745730302e-37	0.55823616270182	0.122	0.052	7.00127899928728e-33	1
Rtp4	9.37654969567636e-58	0.552045181853549	0.226	0.105	1.86583962394264e-53	1
Gpr84	3.99571770468547e-89	0.55025544484191	0.519	0.277	7.95107866055361e-85	1
Cdk6	1.54005414386361e-83	0.549078094128987	0.451	0.234	3.06455374087419e-79	1
Tmem104	5.85197966377403e-59	0.546172648266858	0.258	0.123	1.16448543329439e-54	1
Rnasel	9.26278442434747e-54	0.538422201954575	0.237	0.114	1.8432014726009e-49	1
Dglucy	6.51271285816024e-58	0.529947203080406	0.193	0.083	1.29596473164531e-53	1
Ddit4	2.30927645152677e-67	0.528841066793398	0.34	0.172	4.59522921089312e-63	1
Adprm	2.05398130773873e-28	0.527173727606814	0.1	0.045	4.08721740426929e-24	1
Hspa1a	2.97617854002663e-22	0.524147092233529	0.135	0.075	5.92229767679899e-18	1
Lsp1	1.58860209497397e-46	0.521340291539628	0.182	0.085	3.1611593087887e-42	1
Trp53cor1	1.55663122795418e-41	0.520056501433737	0.151	0.068	3.09754048050603e-37	1
Zfp958	3.01732085305328e-37	0.518950475463571	0.134	0.06	6.00416676549072e-33	1
Dse	1.68849665357984e-35	0.518923856661972	0.125	0.056	3.35993949095853e-31	1
Apaf1	5.05029265993772e-37	0.515004060210384	0.143	0.066	1.00495773640101e-32	1
Gm31243	1.85958571910159e-46	0.513582425216514	0.17	0.076	3.70038962244025e-42	1
Map4k2	8.70524156380689e-33	0.511575739366483	0.134	0.064	1.73225601878193e-28	1
Lilra5	3.90649189492983e-29	0.510409431387441	0.107	0.049	7.77352822172086e-25	1
Il17ra	4.24830605257652e-82	0.509651539072145	0.409	0.204	8.45370421402201e-78	1
Igfbp4	3.74853597364268e-51	0.508407871818913	0.192	0.088	7.45921173395157e-47	1
Adrb2	2.20878095941881e-101	0.508288455344288	0.678	0.381	4.3952532311475e-97	1
Rap2b	2.18798418246431e-35	0.502449713355339	0.141	0.066	4.35386972468573e-31	1
Slc38a6	3.10582829870187e-44	0.501433148141545	0.174	0.081	6.18028773158686e-40	1
AC149090.1	3.6348281229363e-105	0.498265138295868	0.89	0.628	7.23294448183094e-101	1
Gimap9	1.25133797797712e-31	0.495825886042867	0.108	0.048	2.49003744237668e-27	1
Ms4a6c	1.83217276120829e-58	0.4956943070291	0.325	0.17	3.64584057752837e-54	1
Scamp5	1.15086928392729e-84	0.491102500913291	0.374	0.176	2.29011478808692e-80	1
Man2b2	1.55685593507757e-58	0.48977220796623	0.254	0.12	3.09798762521085e-54	1
Rbl2	5.92561449471077e-58	0.482371762530143	0.266	0.13	1.1791380283025e-53	1
Trib1	1.48526248502892e-66	0.481681930870621	0.322	0.158	2.95552381895905e-62	1
C3ar1	1.07037859576953e-83	0.479947146595427	0.602	0.346	2.12994636772179e-79	1
Hes1	3.29284226011646e-23	0.479167329637166	0.102	0.05	6.55242681340575e-19	1
Homer3	2.89285289023119e-25	0.478976397965012	0.1	0.048	5.75648796627105e-21	1
Bhlhe41	1.31322568395796e-87	0.47815140693918	0.594	0.333	2.61318778850795e-83	1
Tmem140	6.20486636577437e-61	0.477974214809479	0.283	0.137	1.23470635812544e-56	1
Asb3	1.53884633774814e-31	0.477208714100261	0.123	0.057	3.06215032748503e-27	1
Rbms1	2.24399943314018e-42	0.4755668890552	0.223	0.115	4.46533447200565e-38	1
Gadd45g	6.54867402383825e-36	0.473909626360073	0.16	0.078	1.30312064400357e-31	1
Nrros	7.33921969983397e-78	0.47112321257524	0.506	0.273	1.46043132806996e-73	1
Myo7a	7.17965450425621e-37	0.46465031346224	0.162	0.079	1.42867944980194e-32	1
Gm15655	5.44503800943705e-37	0.464547680945159	0.132	0.059	1.08350811349788e-32	1
Ptp4a3	7.039148282993e-87	0.464297241223472	0.519	0.274	1.40072011683278e-82	1
Rps27l	1.33937731301576e-108	0.464183056343991	0.686	0.387	2.66522691517007e-104	1
Commd3	3.42375182921984e-89	0.461418640550231	0.488	0.249	6.81292376496456e-85	1
Rab11fip5	2.65145133231114e-45	0.460402469332604	0.167	0.075	5.27612300616593e-41	1
Gm26520	6.8996614029291e-47	0.458424207485286	0.185	0.085	1.37296362256886e-42	1
H2-Q4	1.09393105308606e-23	0.457827367243952	0.12	0.063	2.17681340253595e-19	1
Prrg2	1.67224529445905e-24	0.456579880196833	0.094	0.044	3.32760091144406e-20	1
Slc38a10	6.1503655961642e-64	0.455315156292373	0.387	0.204	1.22386124998071e-59	1
Sac3d1	2.70547869153708e-25	0.454854898659968	0.112	0.055	5.38363204828963e-21	1
Stab1	6.47874435381228e-84	0.454816916908025	0.703	0.433	1.28920533896511e-79	1
Ghdc	1.08313462826447e-26	0.454051674709183	0.121	0.06	2.15532959678346e-22	1
Gm12166	2.01156327496106e-28	0.451981435360232	0.114	0.054	4.00280976084502e-24	1
Tmem268	4.840583938199e-39	0.451606836297999	0.169	0.081	9.63227797862219e-35	1
Mafg	2.13589284504454e-85	0.449870782029409	0.611	0.342	4.25021317235413e-81	1
Rhobtb2	8.66252679684162e-29	0.448198658840623	0.116	0.055	1.72375620730351e-24	1
Mavs	5.91528445782608e-29	0.446756557796273	0.127	0.062	1.17708245426281e-24	1
Prune2	1.5413801436037e-36	0.44510538822013	0.176	0.088	3.067192347757e-32	1
Serpinf1	1.63890203661346e-56	0.444509129643573	0.352	0.19	3.26125116265713e-52	1
Fam78a	8.15548830686646e-28	0.443868126510478	0.112	0.053	1.62286061818336e-23	1
Rchy1	1.50852407123763e-63	0.443841613047067	0.282	0.134	3.00181204935576e-59	1
Cd151	4.42047144886621e-57	0.443374718700221	0.266	0.13	8.79629613609887e-53	1
Oxld1	4.89013408756634e-31	0.442932300756341	0.105	0.046	9.73087782084826e-27	1
Ltc4s	7.10721624281698e-88	0.442164554040564	0.913	0.725	1.41426496015815e-83	1
Slc31a2	2.94584143578446e-50	0.43657865283193	0.243	0.121	5.86192987306751e-46	1
Tgm2	2.07460936886271e-33	0.434891362040321	0.125	0.057	4.12826518309992e-29	1
Disc1	3.27731033007812e-28	0.433540111441125	0.117	0.056	6.52151982582244e-24	1
Tcn2	3.33904823795246e-84	0.433093088935282	0.789	0.502	6.64437208870159e-80	1
Gmppb	2.65045445637757e-27	0.431821748112391	0.097	0.043	5.27413932274573e-23	1
Ralgps1	2.50381899722653e-40	0.430272163464892	0.201	0.101	4.98234942258107e-36	1
Sgpp1	1.80445060422959e-56	0.429905575042948	0.286	0.143	3.59067625735646e-52	1
Rubcn	4.67155910071999e-33	0.42861628293896	0.139	0.066	9.29593545452271e-29	1
Maf	5.23224384883516e-98	0.427726953054619	0.972	0.833	1.04116420347971e-93	1
Nid2	1.63925887154007e-29	0.426706156214575	0.129	0.063	3.26196122847759e-25	1
St3gal5	2.25030133606229e-76	0.426610465814644	0.649	0.39	4.47787462863036e-72	1
Tor4a	1.15452381121136e-29	0.426167141115969	0.103	0.046	2.29738693192948e-25	1
Cmklr1	2.96667696919552e-60	0.425775740596869	0.322	0.164	5.90339050100217e-56	1
Gm26853	2.905559575274e-36	0.424635053317658	0.167	0.082	5.78177299883773e-32	1
Dusp16	1.97158921858899e-33	0.423705099249162	0.157	0.078	3.92326538607023e-29	1
Pgs1	4.64613692971194e-42	0.423338862483851	0.204	0.102	9.24534787643379e-38	1
Sdc3	7.1493254712893e-49	0.422518613220834	0.228	0.113	1.42264427553186e-44	1
Ifi27	8.78200695903406e-69	0.421552496087193	0.472	0.261	1.74753156477819e-64	1
Tmem106a	8.66131271013525e-27	0.419118860550295	0.126	0.063	1.72351461618981e-22	1
Dusp7	1.29782423984577e-74	0.419056377223198	0.649	0.384	2.5825404548691e-70	1
Bcl2a1a	1.94792864670161e-39	0.417577000520173	0.158	0.073	3.87618321407154e-35	1
Slc36a1	6.63686037991701e-71	0.41671675916527	0.389	0.198	1.32066884699969e-66	1
Nfatc2	5.43311554386181e-56	0.415579318146842	0.266	0.129	1.08113566207306e-51	1
Lrrc8a	9.52988097034977e-49	0.409889090752023	0.2	0.093	1.8963510142899e-44	1
B930036N10Rik	9.13179345751645e-50	0.407776170171131	0.25	0.127	1.8171355801112e-45	1
Lztr1	1.11806228678331e-23	0.40750340800384	0.108	0.054	2.2248321444701e-19	1
Syvn1	2.98509828613718e-31	0.40650595666034	0.153	0.077	5.94004707958437e-27	1
Tmem65	9.70348470261455e-49	0.404452941138803	0.251	0.127	1.93089642097327e-44	1
BC037034	2.37975978920011e-67	0.404259787146781	0.454	0.245	4.7354840045293e-63	1
Klf7	1.59763127031649e-70	0.404028311674375	0.499	0.279	3.17912646480278e-66	1
Lrrc3	1.14207284957165e-71	0.403700177796831	0.502	0.274	2.27261076336263e-67	1
Irf2bp2	1.0714444803149e-62	0.403587334071951	0.755	0.506	2.13206737137863e-58	1
Slco4a1	9.4954678661976e-25	0.400812460063057	0.117	0.059	1.88950315069466e-20	1
Sh3bp2	7.20408733696607e-36	0.400406548304777	0.175	0.088	1.43354133918288e-31	1
Rnaset2a	5.87145712398348e-79	0.3987103125972	0.649	0.378	1.16836125310147e-74	1
Tbc1d13	6.59539117167163e-35	0.398465313813179	0.139	0.065	1.31241688925094e-30	1
Emp3	3.11877955329529e-41	0.397434191865332	0.211	0.108	6.20605943310231e-37	1
Alg1	5.27751883264655e-42	0.397016516890446	0.19	0.092	1.05017347250834e-37	1
Slc25a36	1.53627261269773e-66	0.396992535576225	0.415	0.221	3.0570288720072e-62	1
Srrd	1.34058121321032e-25	0.394569906957583	0.138	0.073	2.66762255616722e-21	1
Gba	1.15684058850474e-48	0.393707836776621	0.237	0.118	2.30199708706558e-44	1
Capg	2.76857416708136e-41	0.392945115949903	0.183	0.089	5.50918573507519e-37	1
Zdhhc7	6.44372697460799e-27	0.392778136726889	0.113	0.054	1.28223723067724e-22	1
Pros1	1.53893586218954e-73	0.388444044098435	0.806	0.548	3.06232847217096e-69	1
Ergic1	4.36716243815139e-39	0.388239222401341	0.184	0.091	8.69021653567745e-35	1
Chkb	2.70688386502847e-25	0.387532615516603	0.114	0.056	5.38642820302015e-21	1
Mrpl44	5.38622381530978e-32	0.387188964823437	0.148	0.073	1.07180467700849e-27	1
Fhod1	9.41400253620181e-40	0.386681623916993	0.209	0.107	1.8732923646788e-35	1
Trim11	6.56869324723457e-30	0.386128943471686	0.133	0.065	1.30710426926721e-25	1
Stx16	3.39785760720455e-65	0.386017873453853	0.459	0.249	6.76139685257633e-61	1
Engase	3.38175916706267e-28	0.383714853669026	0.114	0.054	6.72936256653801e-24	1
Wdr41	1.81785395125868e-22	0.383285093353875	0.139	0.077	3.61734757760965e-18	1
P2ry6	1.33491106257873e-66	0.383158829480651	0.769	0.507	2.65633952342542e-62	1
B130006D01Rik	2.93781643102735e-33	0.381419950647061	0.142	0.068	5.84596091610131e-29	1
Tlr6	3.12240567627449e-27	0.38112298317523	0.123	0.061	6.2132750552186e-23	1
Cpsf1	2.29180225206966e-24	0.380289124397099	0.106	0.052	4.56045730139342e-20	1
Ndst2	1.94296643920714e-37	0.379975220595604	0.187	0.095	3.86630891737828e-33	1
Ccdc88b	3.4681897053325e-57	0.378962608013118	0.283	0.139	6.90135069464114e-53	1
Tep1	3.71665624763414e-51	0.375814412906561	0.263	0.132	7.39577426716718e-47	1
Slc35c2	4.64394357890101e-72	0.374780269202509	0.369	0.183	9.24098332765512e-68	1
Pqlc2	1.03046900878427e-24	0.373727191180142	0.103	0.05	2.05053028057981e-20	1
Bcl2l1	4.63599666244661e-55	0.373427638955412	0.302	0.154	9.22516975860251e-51	1
Siglece	1.63019192634889e-62	0.373347782191823	0.343	0.174	3.24391891424166e-58	1
Tgfbi	1.20177837332872e-30	0.373290576783999	0.141	0.07	2.39141878508682e-26	1
Psme2b	3.86817243519489e-26	0.372989984159718	0.133	0.069	7.69727632879431e-22	1
Gm32036	2.88314708771522e-37	0.372498591056094	0.156	0.074	5.73717438984451e-33	1
Chpf2	1.60169655080339e-30	0.371964502422959	0.14	0.069	3.18721596644367e-26	1
Slc46a1	2.5461327339268e-46	0.371410440373984	0.239	0.12	5.06654952724094e-42	1
Hs6st1	3.36568295461267e-60	0.370972577144546	0.377	0.199	6.69737251138376e-56	1
Arhgap22	2.26483015572898e-37	0.370722274367068	0.213	0.112	4.50678552688509e-33	1
Tsix	3.51814747818614e-52	0.370472914222173	0.392	0.222	7.0007616668426e-48	1
Cebpd	1.08707441543666e-68	0.370386668942274	0.588	0.341	2.16316937927741e-64	1
H6pd	7.09806658328068e-24	0.370375368236668	0.102	0.049	1.41244426940702e-19	1
Armc7	1.27419958165092e-23	0.369699283669932	0.1	0.048	2.53552974752716e-19	1
Tsc1	6.73530806395569e-37	0.369303610656805	0.171	0.084	1.34025895164654e-32	1
Nmt1	1.78304249167611e-65	0.367832377864972	0.644	0.392	3.54807625418628e-61	1
Cracr2b	2.517691092671e-32	0.367736427976406	0.139	0.066	5.00995350530603e-28	1
Dok3	2.59260117061437e-35	0.366744323232314	0.169	0.084	5.15901706940554e-31	1
Selenon	5.94497984914159e-26	0.366709429420424	0.107	0.051	1.18299154018068e-21	1
Tmem5	4.57180155306992e-44	0.366217666864624	0.236	0.122	9.09742791045383e-40	1
Mfsd5	2.66457232181301e-41	0.366169404830067	0.212	0.107	5.3022324631757e-37	1
Crlf2	3.0614174188023e-50	0.36541570615443	0.343	0.19	6.0919145216747e-46	1
Aga	2.2071528002816e-52	0.36529803588162	0.34	0.183	4.39201335728036e-48	1
Tmem101	6.63239710196922e-36	0.365229972867715	0.171	0.085	1.31978069932085e-31	1
Hpcal1	1.33498278188399e-23	0.363387432646742	0.115	0.058	2.65648223767095e-19	1
Adap2os	5.02223695132949e-59	0.363355145264769	0.392	0.211	9.99374930945055e-55	1
Naa60	5.97414170221227e-41	0.36280389395667	0.21	0.106	1.18879445732322e-36	1
Emc9	2.33638812964122e-30	0.362347944728031	0.137	0.067	4.64917873917306e-26	1
Stk17b	5.66644802018194e-51	0.361122709329618	0.377	0.211	1.127566491536e-46	1
Eif2b4	1.31427048187628e-36	0.360783107965799	0.168	0.082	2.61526683188561e-32	1
Zbtb34	6.82148253196215e-33	0.359882366297481	0.139	0.066	1.35740680903515e-28	1
Galk2	8.83745729329955e-37	0.359802637561166	0.153	0.072	1.75856562679368e-32	1
Olfml2b	6.72270866869408e-35	0.359280376192061	0.201	0.106	1.33775179798344e-30	1
Nckap5l	1.99481008289303e-50	0.357835209925716	0.266	0.135	3.96947258394883e-46	1
Sh2b1	3.67415178307934e-34	0.356412880345111	0.18	0.092	7.31119463314959e-30	1
Naip5	5.63379623746368e-32	0.355821403181608	0.153	0.076	1.1210691132929e-27	1
Tlr2	4.3069758273037e-56	0.355245349357556	0.337	0.177	8.57045119875163e-52	1
Sfi1	7.28909611099157e-39	0.355052412504712	0.17	0.081	1.45045723512621e-34	1
Nol4l	8.40511544325784e-22	0.354891566729671	0.115	0.06	1.67253392205388e-17	1
Pnpla7	1.25411398171183e-68	0.35473842448842	0.441	0.232	2.49556141220837e-64	1
Alg3	3.47392009414096e-22	0.354737161299684	0.1	0.05	6.9127535953311e-18	1
Dennd2c	3.37220367391403e-43	0.354086050807705	0.197	0.096	6.71034809072152e-39	1
Lrp1	8.96018280271184e-61	0.353940828322816	0.841	0.6	1.78298677591163e-56	1
Slc35b3	3.98258757864816e-29	0.353610970182135	0.143	0.072	7.92495102275196e-25	1
Rnaset2b	3.96236735700986e-67	0.352405093740742	0.601	0.35	7.88471480371393e-63	1
Trpv2	1.48378043155419e-40	0.350947690218967	0.209	0.106	2.95257468074968e-36	1
Scap	6.21790153665844e-31	0.350698880594353	0.144	0.071	1.23730022677966e-26	1
Mtx3	9.93154885067752e-22	0.350509277666199	0.105	0.053	1.97627890579632e-17	1
Layn	2.64502997469229e-29	0.350188035210866	0.115	0.053	5.26334514664018e-25	1
Adcy7	3.82519003034169e-56	0.348890501535269	0.382	0.206	7.61174564137693e-52	1
Zfp40	2.32031212399197e-31	0.348623545998614	0.154	0.078	4.61718909553162e-27	1
Slc17a5	5.73784731447554e-37	0.348342567701937	0.18	0.09	1.14177423710749e-32	1
Kdelc2	4.10529244492477e-31	0.347659635046343	0.17	0.088	8.1691214361558e-27	1
Il15	4.20997034593845e-26	0.347464356102416	0.119	0.059	8.37741999138292e-22	1
Entpd6	1.23717484042485e-24	0.347075305135926	0.119	0.06	2.46185421496141e-20	1
Agpat1	3.26425114509495e-27	0.346458227898355	0.119	0.058	6.49553335362444e-23	1
Mlxip	1.09739318080945e-41	0.346357974846594	0.229	0.118	2.18370269049272e-37	1
Iffo1	1.51217133295295e-52	0.346259437159859	0.379	0.21	3.00906973544307e-48	1
Rab32	3.85465783820132e-48	0.345803572689194	0.264	0.135	7.67038363223681e-44	1
Irf9	1.76601700900747e-58	0.345268362819732	0.337	0.174	3.51419724622396e-54	1
Dagla	3.49328897715268e-26	0.345117732722067	0.113	0.055	6.95129573563611e-22	1
Casp9	1.47492560070762e-24	0.34384176976213	0.1	0.047	2.9349544528481e-20	1
A930024E05Rik	8.12534227172244e-26	0.343237950284417	0.108	0.052	1.61686185865005e-21	1
Gm26782	1.15347154276758e-34	0.343101622682916	0.165	0.082	2.29529302295321e-30	1
Ap4m1	4.54133036640795e-22	0.342899672269909	0.128	0.069	9.03679329611518e-18	1
Ifi27l2a	1.11828414041555e-129	0.342822354509999	0.362	0.145	2.22527361101291e-125	1
Ppp1r3b	1.25063968472899e-41	0.342508907166994	0.238	0.124	2.48864790864221e-37	1
Rce1	6.66948048673149e-33	0.342491136238772	0.157	0.078	1.3271599220547e-28	1
AU040320	5.99412665443377e-40	0.342417017347024	0.187	0.092	1.19277126296578e-35	1
Abhd4	7.98265105273389e-30	0.342112970736706	0.141	0.07	1.58846773298352e-25	1
C5ar2	1.73413647443897e-44	0.341606421684606	0.315	0.175	3.4507581704861e-40	1
Amdhd2	1.91020174428271e-24	0.34154370842301	0.12	0.061	3.80111045094817e-20	1
Mlxipl	2.2181829379661e-55	0.341246448311126	0.432	0.242	4.41396222825874e-51	1
B4galt1	6.22749120052743e-61	0.340086674099356	0.506	0.289	1.23920847399295e-56	1
Etv5	3.31026878869236e-57	0.340063120635708	0.383	0.207	6.58710386261892e-53	1
Fam217b	1.79934555266569e-37	0.339839628092112	0.192	0.097	3.58051771524946e-33	1
Wdfy1	3.53685886828437e-32	0.339492256958416	0.156	0.078	7.03799546199906e-28	1
Tlr13	5.28083986215439e-58	0.33934027848536	0.427	0.235	1.0508343241701e-53	1
Dnajc25	1.00819036892248e-29	0.339004872092527	0.172	0.092	2.00619801511885e-25	1
Il4ra	6.9783270291763e-53	0.338757938699048	0.338	0.18	1.38861729553579e-48	1
Pik3r6	1.95917256501703e-31	0.338126738504257	0.144	0.07	3.8985574871274e-27	1
Tbxas1	1.11348469669182e-60	0.337831754572556	0.706	0.443	2.21572319794705e-56	1
Selenoo	1.20074051172267e-25	0.337680481305405	0.127	0.065	2.38935354427694e-21	1
Sh2b3	4.11554328627322e-57	0.336794625063777	0.454	0.255	8.18951958535508e-53	1
Cyb5r1	1.51731421525005e-31	0.336670904022601	0.153	0.077	3.01930355692608e-27	1
Gm26724	1.32044765357573e-30	0.336491095220653	0.138	0.067	2.62755878585035e-26	1
Rnpep	1.17190304126891e-64	0.336245587983121	0.482	0.267	2.331969861821e-60	1
Itgb2	1.74023507676366e-60	0.336208205293122	0.686	0.432	3.46289377925201e-56	1
H2-DMa	1.46611850978986e-55	0.33530204199434	0.61	0.384	2.91742922263084e-51	1
Cradd	7.65009749616103e-33	0.334842901257598	0.153	0.075	1.52229290076108e-28	1
Hinfp	5.28104819430944e-27	0.334410091311518	0.123	0.06	1.05087578018564e-22	1
3110062M04Rik	1.81602279539635e-34	0.334275998629286	0.174	0.088	3.6137037605592e-30	1
Fkbp5	1.56527829085998e-44	0.334112866102587	0.321	0.179	3.11474727098228e-40	1
Polr1c	8.25935643741189e-28	0.333899095723102	0.148	0.077	1.64352933748059e-23	1
Atxn7l1	2.45297602594383e-37	0.333528035472042	0.185	0.093	4.88117699402563e-33	1
Cept1	2.7285125094923e-53	0.333266618992531	0.342	0.182	5.42946704263872e-49	1
Smpd1	1.08104770359252e-37	0.333016859262874	0.208	0.108	2.15117682537875e-33	1
Gcnt1	1.21378437353831e-57	0.33266084636796	0.642	0.399	2.41530952490388e-53	1
Itpripl1	9.14594099219155e-57	0.331851442394186	0.391	0.212	1.8199507980362e-52	1
Slc2a8	3.01411524965361e-31	0.33142365595973	0.161	0.082	5.99778793528573e-27	1
Fam53b	4.90903161869081e-54	0.331053846427883	0.323	0.168	9.76848201803284e-50	1
Mmd	1.72081527783436e-31	0.329844311657096	0.153	0.077	3.4242503213626e-27	1
Bank1	1.55014379463501e-55	0.329814771706835	0.39	0.214	3.0846311369442e-51	1
Zadh2	8.79293183325864e-20	0.329738345482835	0.111	0.059	1.74970550550014e-15	1
Snx2	2.85869998003053e-54	0.329665153104039	0.504	0.295	5.68852709026276e-50	1
Cdk7	3.66281657625585e-26	0.329531722706583	0.131	0.067	7.28863870509152e-22	1
Frrs1	6.53601402973205e-51	0.329450311293321	0.368	0.203	1.30060143177638e-46	1
1810011H11Rik	1.04559334212544e-56	0.329205848243834	0.325	0.167	2.08062619149542e-52	1
Mterf4	6.60168724475629e-23	0.328882189848381	0.098	0.047	1.31366974483405e-18	1
Wdfy2	1.9660314490036e-53	0.328691463806994	0.377	0.207	3.91220598037227e-49	1
Tmem250-ps	1.27633367828596e-21	0.328094529652708	0.109	0.056	2.53977638642124e-17	1
Grap	2.29478911754547e-68	0.327644322913553	0.45	0.243	4.56640086500372e-64	1
Ubtd1	1.93772445329819e-34	0.327228366608426	0.167	0.083	3.85587788961808e-30	1
Mob3c	9.4319579334259e-39	0.326934046948818	0.25	0.135	1.87686530917242e-34	1
Zcchc9	4.54831466432479e-41	0.326120535234502	0.25	0.133	9.05069135053991e-37	1
Stoml1	5.39318337458478e-23	0.3249973491408	0.104	0.051	1.07318955970862e-18	1
Fmnl1	7.60319889853377e-56	0.324919165558711	0.433	0.242	1.51296054881923e-51	1
Bst2	1.15304140885584e-107	0.324437034456244	0.703	0.398	2.29443709948223e-103	1
Fam110a	3.66144222911992e-43	0.324250284479669	0.286	0.155	7.28590389172573e-39	1
Tnfrsf1a	1.43781307351047e-57	0.324171378668129	0.504	0.289	2.86110423497848e-53	1
Cryba4	4.02333571547681e-56	0.323328815135767	0.399	0.221	8.00603574022731e-52	1
Prmt2	2.32656424947468e-26	0.321605354754749	0.113	0.055	4.62963020002966e-22	1
Mgat4b	7.32072055549796e-41	0.320780975162574	0.238	0.125	1.45675018333854e-36	1
Fiz1	4.81845035413224e-26	0.32073924294382	0.149	0.08	9.58823435968774e-22	1
Sh3gl1	5.12117234039627e-37	0.320307083033015	0.217	0.115	1.01906208401545e-32	1
Stk40	2.01813591552065e-30	0.31909213521498	0.166	0.087	4.01588865829455e-26	1
Retreg1	6.29884081421297e-55	0.317306872877784	0.726	0.473	1.25340633362024e-50	1
Krit1	1.89826024689634e-54	0.316228633960461	0.536	0.32	3.77734806529903e-50	1
Prkca	1.45270808232976e-53	0.316193810302356	0.329	0.173	2.89074381302798e-49	1
Tmem115	1.83609259532576e-38	0.315116129221088	0.193	0.097	3.65364065543873e-34	1
Tgfbrap1	3.17093992384024e-54	0.315001250571414	0.33	0.173	6.30985335444969e-50	1
Ubald1	4.4745972897587e-34	0.314410980231585	0.183	0.094	8.90400114689084e-30	1
Gnpda2	6.05219097919724e-38	0.31430654554235	0.217	0.113	1.20432548295046e-33	1
Acvr2b	9.91034358798123e-22	0.314142226110824	0.102	0.051	1.97205927057238e-17	1
Ms4a6b	3.14224284071381e-62	0.314074301506985	0.591	0.349	6.25274902873641e-58	1
Orai2	1.80052047508605e-38	0.313710155466806	0.217	0.113	3.58285569337373e-34	1
Slc45a4	4.87986982738826e-39	0.313699492294262	0.205	0.104	9.7104529695199e-35	1
Rgmb	6.16067123878931e-55	0.313041427803672	0.465	0.264	1.22591196980668e-50	1
Arhgap45	3.52000106996161e-62	0.312499002663555	0.724	0.452	7.00445012911661e-58	1
Impact	3.27803938502467e-36	0.31216589449539	0.213	0.113	6.52297057226059e-32	1
Oraov1	1.7462861298576e-25	0.311003207371697	0.122	0.061	3.47493476980364e-21	1
Arhgap4	9.09603833166894e-55	0.310770854595342	0.374	0.203	1.8100206676188e-50	1
Rin2	4.95782300976998e-56	0.310614773342157	0.596	0.365	9.86557200714128e-52	1
Thyn1	3.29013445935984e-28	0.310013913170168	0.136	0.069	6.54703856068015e-24	1
H2-T23	1.20601998732939e-60	0.309420666384347	0.518	0.297	2.39985917278675e-56	1
Ets2	1.74545403354581e-19	0.309147825484385	0.111	0.06	3.4732789813528e-15	1
Oaf	1.09783539856318e-27	0.308753695207389	0.17	0.093	2.18458265960088e-23	1
Nagk	2.60959354882478e-31	0.308345788287623	0.199	0.109	5.19283020280643e-27	1
Mcoln1	9.13286344622218e-23	0.307672658968499	0.109	0.055	1.81734849716375e-18	1
Soga1	1.15246714484388e-57	0.307620019213119	0.462	0.259	2.29329437152484e-53	1
Ccm2	2.90029337099369e-42	0.307515643543542	0.205	0.101	5.77129377894035e-38	1
Zzef1	1.00050817428282e-34	0.307499430905959	0.215	0.116	1.99091121600538e-30	1
Dopey2	4.59500407316721e-41	0.307312851799148	0.25	0.132	9.14359860519543e-37	1
Tbkbp1	3.832077462282e-24	0.307162494921927	0.113	0.056	7.62545094219495e-20	1
Tubb2a	2.15193844722341e-51	0.307147140425556	0.47	0.274	4.28214231612985e-47	1
Rhog	2.10178435460416e-58	0.306396340231323	0.563	0.33	4.18234068722682e-54	1
Hist1h1d	1.03906276078723e-18	0.305995525182287	0.145	0.086	2.06763098769051e-14	1
Piezo1	8.24262760125405e-25	0.305744859812264	0.12	0.06	1.64020046637354e-20	1
Pdcd2	6.90453814211729e-27	0.305671735995879	0.123	0.061	1.37393404489992e-22	1
Nbr1	1.08419443016065e-49	0.30551728901963	0.311	0.164	2.15743849657668e-45	1
Gm46224	5.35548037646274e-24	0.305478614456556	0.122	0.062	1.06568704011232e-19	1
Ebi3	3.1953974066317e-33	0.304870219738148	0.186	0.097	6.35852129945642e-29	1
Zdhhc8	1.34487647386083e-20	0.304847102286442	0.107	0.056	2.67616969533566e-16	1
Hacd4	5.77945100957675e-33	0.304555432531991	0.213	0.117	1.15005295639568e-28	1
Fam193b	3.07735974937331e-38	0.304496507773386	0.196	0.099	6.12363816527795e-34	1
Fkrp	2.25136424784794e-25	0.304414925300353	0.151	0.081	4.47998971679262e-21	1
Susd6	2.51942542925909e-41	0.304208053194198	0.35	0.204	5.01340466168266e-37	1
Chst12	2.36934677997689e-21	0.304149950058906	0.128	0.07	4.71476315747602e-17	1
Saysd1	2.14255348035536e-46	0.30411703290669	0.296	0.158	4.26346717055913e-42	1
P2rx7	8.34471560318673e-57	0.304009731653556	0.496	0.282	1.66051495787813e-52	1
Galnt12	2.50128194587336e-45	0.303611590664447	0.281	0.15	4.9773009440934e-41	1
Dennd1c	9.82125890492188e-43	0.303040521600705	0.213	0.106	1.95433230949041e-38	1
Gmppa	6.4184160298554e-23	0.30267141327379	0.115	0.059	1.27720060578093e-18	1
Vps8	1.56021553490941e-24	0.302398180834777	0.115	0.058	3.10467289291624e-20	1
Rtn1	2.03634734372878e-55	0.302383851125141	0.415	0.229	4.05212757928589e-51	1
Herc4	4.84767422391187e-41	0.302143004933889	0.249	0.132	9.64638693816224e-37	1
Adam15	1.31413175767688e-58	0.301697542247423	0.613	0.368	2.61499078460123e-54	1
Map3k7	2.17686146573614e-32	0.300978276331012	0.208	0.113	4.33173663066835e-28	1
Rnf150	2.75199629165317e-28	0.300427555741983	0.167	0.089	5.47619742076063e-24	1
Fam71a	0	6.69666841392214	0.163	0.003	0	2
Gm26802	5.952354292734e-223	6.61504175856071	0.079	0.001	1.18445898071114e-218	2
Fos	0	5.72598785715015	0.826	0.068	0	2
Fosb	0	5.39080061145396	0.501	0.031	0	2
Dusp1	0	5.33010904467423	0.628	0.051	0	2
Egr1	0	5.15988688296975	0.84	0.068	0	2
Klf2	0	4.8213305688014	0.547	0.064	0	2
Ier2	0	4.59541804388008	0.593	0.053	0	2
Atf3	0	4.46241908405039	0.44	0.047	0	2
Tmem88	1.19920251884426e-127	4.2493465197382	0.066	0.004	2.3862930922482e-123	2
Ier3	0	4.06658946139514	0.354	0.043	0	2
Egr2	5.54043210852877e-217	3.97221792452183	0.124	0.008	1.10249058527614e-212	2
Klf4	0	3.90778118429776	0.318	0.04	0	2
Nr4a1	9.46882928904327e-128	3.70253167984262	0.079	0.006	1.88420234022672e-123	2
Ppp1r15a	0	3.64306183188287	0.509	0.067	0	2
Socs3	0	3.59356252311997	0.509	0.072	0	2
Nfkbiz	0	3.55191381419226	0.329	0.045	0	2
Egr3	2.08730975200492e-147	3.48579866370179	0.103	0.01	4.15353767551458e-143	2
Mir142hg	1.8604122968834e-169	3.48216743883132	0.127	0.014	3.70203442956828e-165	2
Zfp36	0	3.40079677809255	0.953	0.319	0	2
Adamts1	4.1546904103141e-83	3.30333028120504	0.133	0.032	8.26741844748402e-79	2
Junb	0	3.24086342266962	0.959	0.393	0	2
Gm26532	0	3.1520570372916	0.332	0.053	0	2
Btg2	0	2.95869185982744	0.97	0.488	0	2
Nfkbid	1.82815237930829e-144	2.92521964583174	0.156	0.026	3.63784041958557e-140	2
Jun	0	2.82715675412527	0.996	0.639	0	2
Neat1	2.23260313737499e-261	2.82288271658689	0.426	0.118	4.4426569830625e-257	2
Gem	3.36816192990618e-92	2.75158826822862	0.102	0.017	6.70230542432032e-88	2
Ccl4	9.28599598836666e-221	2.3936647758828	0.265	0.052	1.84782034172508e-216	2
Ccl3	2.15416607455792e-119	2.35387959365805	0.222	0.062	4.2865750717628e-115	2
Tnf	1.14790600689523e-69	2.34412250607352	0.124	0.032	2.28421816312082e-65	2
Jund	0	2.33132366522379	0.974	0.582	0	2
Sertad1	1.37314945721555e-59	2.13558498228393	0.105	0.027	2.73243010491321e-55	2
Rgs1	3.78825497237945e-244	2.12620221183052	0.515	0.173	7.53824856953786e-240	2
Klf6	9.00217345980707e-260	2.06430585970897	0.695	0.332	1.79134249676701e-255	2
Ccrl2	1.65280074970163e-69	1.99329753364549	0.142	0.041	3.28890821183128e-65	2
Nfkbia	2.43274923999977e-257	1.9726602106764	0.664	0.308	4.84092771267555e-253	2
4933433G15Rik	1.88614318344232e-39	1.87874832347054	0.081	0.023	3.75323632073186e-35	2
Gm9484	3.4761170597675e-41	1.82101906115341	0.081	0.022	6.91712533723135e-37	2
Mid1	7.91807523787305e-53	1.81681885374169	0.131	0.042	1.57561779158436e-48	2
Tsc22d3	5.10841637533172e-164	1.8151614121079	0.45	0.176	1.01652377452726e-159	2
Tnfaip3	1.38483061600602e-112	1.81411603423744	0.273	0.09	2.75567444279038e-108	2
Csrnp1	4.78899845073093e-35	1.800956343223	0.074	0.021	9.52962801710947e-31	2
Ier5	0	1.75640678666276	0.914	0.544	0	2
Kdm6b	1.14168990525924e-89	1.73573670713686	0.209	0.066	2.27184874247536e-85	2
Ccl2	4.19754854177778e-47	1.67608139244091	0.144	0.053	8.35270184328361e-43	2
Marcksl1	1.4646322754513e-62	1.6141379760846	0.222	0.091	2.91447176492055e-58	2
Hspa1a1	6.48992884059499e-34	1.53929509672188	0.164	0.076	1.29143093999e-29	2
Spry1	1.7332162681898e-31	1.49755555208508	0.111	0.044	3.44892705207088e-27	2
Hist1h1c	7.31486830174891e-96	1.4771873343951	0.45	0.232	1.45558564336502e-91	2
Plk3	4.29359429926505e-34	1.47293239722311	0.134	0.056	8.54382329610753e-30	2
Cited2	1.3267645014463e-63	1.46594930734887	0.351	0.185	2.64012868142799e-59	2
Ppp1r10	6.5244181065898e-159	1.45532758924207	0.557	0.261	1.2982939590303e-154	2
Nabp1	4.89497615208845e-30	1.44536411430744	0.117	0.049	9.7405130450408e-26	2
H3f3b	0	1.43159761102242	0.989	0.886	0	2
Gm26522	2.40118168205144e-19	1.42268068844156	0.094	0.043	4.77811142911415e-15	2
Gm26669	7.0750557896975e-62	1.40657999849241	0.214	0.085	1.40786535159191e-57	2
Dnajb1	3.45335350021636e-62	1.39304791291565	0.303	0.147	6.87182813008054e-58	2
Zfp36l1	5.22884134311918e-270	1.35773612939593	0.926	0.679	1.04048713886729e-265	2
Il1a	5.04383711746042e-57	1.34536928578343	0.279	0.134	1.00367314800345e-52	2
Rabepk	7.4980221449164e-28	1.34206225024891	0.106	0.043	1.49203142661692e-23	2
Per1	1.83141668856423e-37	1.33086396532804	0.14	0.057	3.64433606857397e-33	2
Tgif1	1.8037005685904e-61	1.32976871974635	0.248	0.108	3.58918376143803e-57	2
Rhob	0	1.31812901847448	0.994	0.855	0	2
Sgk1	4.33421320718881e-142	1.31377648844714	0.784	0.564	8.62465086098501e-138	2
Icam1	6.35662699781688e-71	1.31210924609334	0.422	0.236	1.26490520629558e-66	2
Btg1	4.23209473969535e-219	1.29737822072408	0.862	0.575	8.42144532251978e-215	2
Dnajb4	3.76031018657102e-75	1.29666571068283	0.323	0.147	7.48264124025768e-71	2
Ubc	0	1.23439533194849	0.98	0.851	0	2
Gm10138	1.84967860548915e-56	1.22514705462264	0.262	0.121	3.68067545706287e-52	2
Errfi1	2.00622789058761e-41	1.21275718192423	0.197	0.091	3.99219287948029e-37	2
Hist1h1d1	1.39876837492575e-22	1.20397710217958	0.163	0.088	2.78340918926474e-18	2
Neurl3	4.20395892546474e-57	1.17664221037796	0.288	0.138	8.36545786578228e-53	2
Tagap	1.97399495917394e-56	1.16883426545457	0.326	0.169	3.92805256926022e-52	2
Ccnl1	2.33735182536097e-97	1.16501053973491	0.586	0.355	4.65109639728579e-93	2
Tob2	1.8491607317916e-54	1.13846921877556	0.356	0.197	3.6796449401921e-50	2
B930036N10Rik1	6.03303200243007e-40	1.11358041258678	0.255	0.135	1.20051303816356e-35	2
Chka	1.1129981989805e-39	1.09570967527297	0.282	0.156	2.21475511615129e-35	2
Tmx4	1.64069783609879e-47	1.09437932326564	0.496	0.334	3.26482462405297e-43	2
Arrdc3	1.85009660281494e-32	1.05859588634023	0.222	0.119	3.68150722994144e-28	2
Map3k8	4.98734957869711e-22	1.04051834921092	0.139	0.071	9.92432692664939e-18	2
Zfand5	7.39158949232693e-102	1.02220228583291	0.673	0.437	1.47085239307814e-97	2
Ddit3	1.49613280578385e-37	1.01477927282352	0.228	0.116	2.97715467022929e-33	2
Clk1	4.64417536632202e-100	0.986896322412922	0.718	0.498	9.24144456144419e-96	2
Id2	2.81559188945514e-21	0.973739486184434	0.238	0.151	5.60274630082679e-17	2
Tsc22d2	1.16199889607786e-49	0.963439069948523	0.413	0.249	2.31226160330534e-45	2
Coq10b	2.94544663860996e-32	0.954936201180402	0.222	0.118	5.86114426616997e-28	2
Mcl1	1.86299746787582e-131	0.950831710080313	0.81	0.579	3.70717866132609e-127	2
Atf4	6.37280787927216e-64	0.928166549936884	0.497	0.308	1.26812503989637e-59	2
Hist1h1e	2.09948823521755e-77	0.927860060952952	0.504	0.289	4.1777716392594e-73	2
Cebpa	2.69905509538475e-68	0.925813521973135	0.545	0.343	5.37084973430611e-64	2
Txnip	3.12012479065834e-134	0.923646669894624	0.888	0.691	6.20873632093103e-130	2
Relb	2.02955679487868e-15	0.918268276799444	0.126	0.071	4.03861506612909e-11	2
Cebpb	9.67098760899594e-71	0.902556960820007	0.622	0.417	1.9244298243141e-66	2
Slc15a3	3.43382985974476e-71	0.898948325396484	0.614	0.412	6.83297803790609e-67	2
Snhg12	3.63358757446439e-29	0.869500110262497	0.266	0.157	7.2304759144267e-25	2
Pnrc1	2.85682397037224e-77	0.862774984200101	0.686	0.483	5.68479401864372e-73	2
Hexim1	1.08660857301188e-29	0.855351615030434	0.208	0.111	2.16224239943634e-25	2
Slc38a2	6.07092008132433e-46	0.851371021160031	0.487	0.325	1.20805238698273e-41	2
Zfp36l2	2.56945234306272e-109	0.843401268216357	0.861	0.669	5.11295321746051e-105	2
Pcf11	1.85357367154554e-41	0.837976658443547	0.373	0.226	3.68842624900848e-37	2
Brd2	2.07867011382981e-53	0.815521781327758	0.507	0.326	4.13634565950993e-49	2
Ddx3x	2.1955964657019e-61	0.814423049549438	0.642	0.46	4.36901740710022e-57	2
Chd2	9.9557891515066e-52	0.798459448097662	0.499	0.317	1.9811024832583e-47	2
Dusp6	1.64428213097529e-65	0.786087401953111	0.719	0.542	3.27195701242773e-61	2
Rhoh	3.06511493580138e-90	0.780478558086735	0.78	0.557	6.09927221075117e-86	2
Rassf1	3.50526751694877e-15	0.779733270841871	0.184	0.118	6.97513183197635e-11	2
Trim47	7.63689808180835e-20	0.77380532345148	0.179	0.103	1.51966634929904e-15	2
Skil	1.463401615099e-72	0.750148707498496	0.711	0.511	2.9120228738855e-68	2
Smad7	3.1319272041985e-60	0.749742678630071	0.705	0.524	6.23222194363459e-56	2
Rgs2	4.86963740601609e-81	0.741502744116268	0.882	0.746	9.69009147423141e-77	2
Ddx5	1.84466631184611e-168	0.732743142074304	0.978	0.879	3.67070149394257e-164	2
Rcan1	5.71350340075008e-14	0.724738814272182	0.148	0.09	1.13693004171526e-09	2
Trib11	1.27705454865645e-20	0.715681447438402	0.269	0.175	2.54121084637146e-16	2
Tra2b	1.31188654715477e-48	0.706897407207396	0.588	0.418	2.61052304018329e-44	2
Srsf5	6.93503735349143e-77	0.688970586723495	0.793	0.606	1.38000308297126e-72	2
Midn	2.05780696418996e-18	0.681129219766452	0.215	0.135	4.0948300780416e-14	2
Taf7	6.74796695458529e-20	0.67847654106986	0.242	0.153	1.34277794429293e-15	2
Kctd12	5.28112902051463e-118	0.676156858940292	0.975	0.878	1.05089186379221e-113	2
Adrb21	6.63544764381706e-31	0.654390644653309	0.547	0.416	1.32038772664316e-26	2
Adrb1	7.98813723213862e-14	0.65328811769222	0.229	0.157	1.58955942782326e-09	2
Tssc4	5.98210747980061e-11	0.636425328038428	0.142	0.091	1.19037956740552e-06	2
Arl4c	5.25065272003682e-49	0.634914778037085	0.67	0.484	1.04482738476013e-44	2
Ucp2	2.06701831967501e-59	0.633642000065103	0.695	0.499	4.1131597543213e-55	2
Irf2bpl	1.21003943245493e-29	0.621090175134254	0.404	0.271	2.40785746664207e-25	2
Cbx4	3.29506007015845e-15	0.620765496342612	0.156	0.093	6.5568400336083e-11	2
Agmo	2.85552020322992e-18	0.617634316499564	0.267	0.178	5.68219965240721e-14	2
Rlim	1.61736528325723e-24	0.617389722313447	0.34	0.225	3.21839517715357e-20	2
Jmjd1c	7.62937765183053e-53	0.613939927517735	0.801	0.646	1.51816985893776e-48	2
Hnrnpa2b1	1.47549254021632e-72	0.604926117888272	0.919	0.797	2.93608260577646e-68	2
Ncf2	8.98517894002738e-44	0.602253689886797	0.588	0.422	1.78796075727605e-39	2
Ccdc86	8.68889459146584e-13	0.581315523444217	0.18	0.117	1.72900313475579e-08	2
Sat1	1.70344304150742e-57	0.581211705969169	0.849	0.711	3.38968130829562e-53	2
Ifrd1	1.73191472359652e-12	0.575838076531644	0.194	0.13	3.44633710848471e-08	2
Ifitm10	4.61489011296113e-11	0.552211169076482	0.147	0.094	9.18316983578136e-07	2
Acox3	1.6124721839401e-15	0.548732722919526	0.315	0.228	3.20865839882241e-11	2
Rnf19b	9.05444421177448e-18	0.539920953267601	0.279	0.187	1.801743853701e-13	2
Sbno2	1.01774362987756e-10	0.52666081929358	0.212	0.15	2.02520804909335e-06	2
Mafb	4.7574564933275e-44	0.518946926524878	0.914	0.819	9.46686267607239e-40	2
Cebpd1	2.16059810878238e-17	0.507829991233187	0.475	0.37	4.29937417666606e-13	2
Pik3r1	3.68211241133241e-32	0.49824411882472	0.682	0.554	7.32703548731036e-28	2
Fam46a	4.16438971607463e-20	0.496833788331386	0.509	0.393	8.2867190960169e-16	2
Ptma	1.59065848945164e-76	0.49403392772643	0.935	0.823	3.16525132815982e-72	2
Gm26778	8.37584692874971e-18	0.490710290392484	0.289	0.196	1.6667097803519e-13	2
Dnaja1	7.94962177824104e-20	0.487432386461571	0.593	0.483	1.58189523765218e-15	2
Mat2a	9.86080007501148e-17	0.481450744082627	0.458	0.358	1.96220060692654e-12	2
Cd14	4.40741561431683e-27	0.479476547328182	0.587	0.449	8.77031633092907e-23	2
Zfp622	9.91786108731024e-10	0.472526980206454	0.181	0.126	1.97355517776387e-05	2
Srsf2	3.6455831349858e-30	0.470212794806562	0.617	0.467	7.25434588030824e-26	2
Vgll4	2.63581700731392e-15	0.464182179457283	0.398	0.305	5.24501226285397e-11	2
Sox4	1.97774366809006e-14	0.463880625606674	0.55	0.45	3.93551212513241e-10	2
Zcchc6	4.40224883116166e-22	0.462435471280649	0.522	0.4	8.76003494912858e-18	2
Hspa8	2.71706489378087e-52	0.455071348011391	0.941	0.856	5.40668743213455e-48	2
Ercc5	1.41869682453719e-09	0.451088221078263	0.218	0.158	2.82306481114655e-05	2
Runx1	1.45023099682585e-22	0.450486480655408	0.542	0.417	2.88581466058376e-18	2
Plek	8.68543229541791e-28	0.444616518401266	0.657	0.529	1.72831417246521e-23	2
Spty2d1	3.40600959655353e-13	0.441156838349636	0.259	0.182	6.77761849618187e-09	2
Trim8	6.19038031671694e-18	0.439031838057548	0.381	0.277	1.2318237792235e-13	2
Med21	9.29105138964535e-10	0.429480459913804	0.212	0.152	1.84882631602553e-05	2
Zyx	9.89289750698197e-11	0.428816491042408	0.212	0.149	1.96858767491434e-06	2
Nlrp3	1.25215468959013e-10	0.4287664093539	0.26	0.192	2.49166261681541e-06	2
Pabpc1	3.70303360516309e-45	0.427885177873112	0.784	0.646	7.36866657091402e-41	2
Hist1h2bc	5.42488250807829e-14	0.426025664406348	0.361	0.273	1.0794973702825e-09	2
Pdgfb	3.03459328089219e-12	0.422394623045719	0.492	0.411	6.03853716964736e-08	2
Ppp1r3b1	2.97050494202412e-09	0.42130801620754	0.193	0.137	5.9110077841338e-05	2
Ftl1	3.65354020563732e-88	0.416087125404372	0.973	0.906	7.2701796551977e-84	2
Glul	5.35701950517509e-45	0.408698479833808	0.91	0.797	1.06599331133479e-40	2
Etv3	7.12979918607006e-10	0.407396511116699	0.268	0.2	1.41875874003608e-05	2
Col27a1	1.84407863379402e-17	0.405451431207879	0.409	0.301	3.66953207338673e-13	2
Tle4	4.79736050968571e-13	0.405278247733254	0.389	0.302	9.54626767822358e-09	2
Arf4	3.55783699683942e-20	0.401851235525815	0.542	0.423	7.07973984001077e-16	2
Tuba1a	1.23266320452577e-14	0.397838041894985	0.484	0.386	2.45287651068582e-10	2
Hist1h4d	1.62937775809861e-09	0.39781339907442	0.181	0.127	3.24229880084042e-05	2
Bcl10	5.17027207294334e-13	0.39255870572745	0.358	0.269	1.028832439795e-08	2
Tox4	1.45611216201662e-14	0.392482451299839	0.388	0.293	2.89751759119688e-10	2
Stk17b1	2.69640978024276e-13	0.389310349096764	0.315	0.23	5.36558582170507e-09	2
Il10ra	1.2544053263188e-20	0.389073795573757	0.572	0.452	2.49614115884179e-16	2
Zc3h13	4.33150943746156e-11	0.385141972048738	0.231	0.164	8.61927062960476e-07	2
Nufip2	4.56165596635575e-13	0.383592455964897	0.445	0.353	9.0772392074513e-09	2
Arid4a	2.24108298923705e-16	0.383417309000355	0.404	0.298	4.4595310402828e-12	2
Gpx1	3.05060561250559e-26	0.368137557972985	0.643	0.507	6.07040010832487e-22	2
Mef2d	3.17874153531279e-12	0.367067733129387	0.291	0.211	6.32537778111891e-08	2
Gtf2b	1.11090624420697e-07	0.36295970571619	0.21	0.157	0.00221059233534744	2
Erf	4.8953644006543e-08	0.361541357271181	0.234	0.178	0.0009741285620862	2
Hspa5	6.6030248889886e-23	0.358412533235996	0.887	0.795	1.31393592265984e-18	2
Slmap	9.19048320530342e-12	0.358204507131415	0.368	0.285	1.82881425302333e-07	2
Actg1	5.64159248357016e-34	0.357403110582081	0.897	0.802	1.12262048830563e-29	2
Herpud1	1.03944896167765e-16	0.352883609189981	0.483	0.371	2.06839948884235e-12	2
Ube2d3	7.21306553915401e-19	0.350890688111103	0.713	0.602	1.43532791163626e-14	2
Slc15a4	1.18346649139881e-12	0.346557979519767	0.293	0.211	2.35497997123449e-08	2
Gpr146	1.74438821494487e-09	0.345609775557369	0.245	0.18	3.4711581089188e-05	2
Eif1	6.26136010813199e-49	0.339914128519605	0.934	0.855	1.24594804791719e-44	2
Puf60	5.84003870858857e-09	0.339083406943028	0.263	0.2	0.000116210930262204	2
Eif3a	1.23160691208545e-19	0.335853281229559	0.535	0.409	2.45077459435883e-15	2
Epc1	4.82285762451299e-07	0.335005910320058	0.253	0.2	0.0095970043870184	2
Lemd2	1.757286687535e-08	0.334004721461502	0.199	0.144	0.00034968247795259	2
Ptp4a1	1.20589717848542e-07	0.333220121925202	0.201	0.15	0.00239961479546815	2
Sqstm1	8.98900854612674e-12	0.330560005531509	0.302	0.224	1.78872281059376e-07	2
Kif5b	9.6736147894712e-20	0.32695518026528	0.515	0.384	1.92495260695687e-15	2
Eif4a2	2.54203223074703e-19	0.322435164510525	0.65	0.524	5.05838993596352e-15	2
Gab2	1.06297967964037e-08	0.320656561476884	0.163	0.113	0.000211522326451638	2
Cdkn1b	1.53828292814919e-06	0.319127335961885	0.282	0.229	0.0306102919872408	2
Sall3	4.00060482264497e-07	0.306072258100825	0.318	0.258	0.00796080353658123	2
Wsb1	8.39424850462824e-11	0.306023522394015	0.496	0.41	1.67037150993597e-06	2
P2rx4	6.41072805701964e-08	0.3042119755072	0.244	0.187	0.00127567077606634	2
Hist2h2aa1	6.26534339777547e-29	2.22858860084462	0.084	0.028	1.24674068272334e-24	3
Gm10076	0	2.10825714588557	0.783	0.264	0	3
Trmt10a	4.7666420993494e-18	1.62610793751425	0.131	0.07	9.48514111349538e-14	3
Glrp1	1.17856181028808e-23	1.60935434341271	0.164	0.087	2.34522014629225e-19	3
Gm312431	1.44269460034038e-20	1.59470109794106	0.156	0.086	2.87081798521732e-16	3
Susd61	2.05962637990635e-47	1.41312674348014	0.353	0.216	4.09845053337565e-43	3
B930036N10Rik2	4.96792149518509e-11	1.23335646197251	0.195	0.143	9.88566698326882e-07	3
Uba52	4.46081022238082e-76	1.23230617213618	0.493	0.309	8.87656626151559e-72	3
Nudcd3	6.88269930739933e-28	1.13454987332742	0.341	0.242	1.36958833517939e-23	3
Arhgef1	1.59307236075056e-31	1.11323355928	0.386	0.282	3.17005469065753e-27	3
Eif3j1	5.46118350800646e-25	1.09102069911973	0.322	0.23	1.0867209062582e-20	3
Samsn1	8.47822540031155e-55	1.06261435801401	0.571	0.451	1.68708207240799e-50	3
mt-Nd4l	9.05554097169265e-128	1.00395048284405	0.869	0.759	1.80196209795712e-123	3
Tsix1	9.58752832161562e-13	1.00335602568857	0.301	0.245	1.90782226071829e-08	3
Hk2	1.43932099881837e-58	0.987029098914117	0.614	0.495	2.86410485554867e-54	3
mt-Atp8	1.72467008708081e-76	0.957722043058674	0.695	0.552	3.43192100628211e-72	3
Pet100	6.05783758052489e-14	0.946389969446043	0.254	0.19	1.20544910014865e-09	3
Rps28	7.31267075587433e-211	0.938458099463684	0.964	0.859	1.45514835371143e-206	3
Atp5k	6.88380083944468e-26	0.931443640839052	0.402	0.312	1.3698075290411e-21	3
Rpl38	1.1607004282715e-185	0.925559611615614	0.924	0.804	2.30967778221746e-181	3
Tsc22d4	4.40301807209859e-81	0.923422741146474	0.739	0.634	8.76156566166898e-77	3
Rpl35	2.56267646287407e-97	0.918635166424952	0.74	0.584	5.09946989347311e-93	3
Tcf7l2	4.92128076181568e-12	0.902455932387103	0.294	0.241	9.79285658793702e-08	3
Rps27	1.99188957401874e-202	0.900979006614721	0.963	0.891	3.9636610633399e-198	3
Tlr3	1.92270391471948e-14	0.889610976128698	0.348	0.292	3.82598851990029e-10	3
Taf1d	6.45388199262874e-14	0.845150070847851	0.334	0.274	1.28425797771319e-09	3
Son	1.1378157776048e-138	0.838958036989831	0.912	0.819	2.26413961585579e-134	3
Cdkn1a1	1.31900864271514e-67	0.825734030507181	0.519	0.295	2.62469529813885e-63	3
Hist1h2ap	5.64794388002343e-85	0.823735831063216	0.187	0.052	1.12388435268586e-80	3
Bhlhe411	1.16169221793165e-19	0.810451679482785	0.437	0.37	2.31165134446218e-15	3
Sec62	1.54529066999491e-43	0.779080526262246	0.648	0.578	3.07497390422287e-39	3
Gpr183	1.51682170976803e-26	0.748009418494721	0.574	0.517	3.0183235202674e-22	3
Entpd1	3.6420181949863e-69	0.743661171835776	0.812	0.739	7.24725200620324e-65	3
Nars	2.99755556510273e-26	0.742557438903699	0.527	0.46	5.96483581899793e-22	3
Rab8b	2.26529489473038e-19	0.733099327465434	0.449	0.385	4.50771031102398e-15	3
Lyn	8.44316139697533e-77	0.723120086139434	0.833	0.767	1.68010468638412e-72	3
Ktn1	3.79338341254517e-14	0.70824400495978	0.401	0.347	7.54845365262364e-10	3
St13	3.33535854479286e-24	0.695754522231732	0.541	0.478	6.63702996828332e-20	3
Inpp5d	3.0505994574089e-53	0.662868812150907	0.776	0.719	6.07038786029796e-49	3
Lst1	6.39933626075525e-17	0.654823282236061	0.505	0.452	1.27340392252769e-12	3
AC149090.11	6.56833153611182e-39	0.636858567162733	0.729	0.665	1.30703229237089e-34	3
Slc15a31	3.31035465874774e-22	0.605050408656494	0.507	0.425	6.58727473544213e-18	3
Rpl36	1.31442262211921e-58	0.599990892042058	0.836	0.785	2.61556957575501e-54	3
Mef2c	5.38425062470675e-92	0.59778126816557	0.951	0.9	1.0714120318104e-87	3
P2ry13	8.85955306579089e-54	0.583393692829701	0.851	0.797	1.76296246456173e-49	3
Maf1	2.53518757944695e-66	0.580829215945688	0.905	0.851	5.04476976434148e-62	3
Lgals3bp1	7.71282678974069e-11	0.530730251220964	0.424	0.372	1.5347754028905e-06	3
Rpl36a	1.08916787671255e-51	1.38797077840395	0.624	0.687	2.16733515787029e-47	4
Rps271	2.76030798445562e-135	1.37512573373702	0.848	0.9	5.49273685826824e-131	4
Rpl361	3.55782749763454e-80	1.29515627006356	0.725	0.794	7.07972093754298e-76	4
Rpl41	4.33510342510228e-157	1.29463512714856	0.848	0.903	8.62642230561103e-153	4
Rpl22	2.86172455702942e-79	1.26952760431813	0.72	0.798	5.69454569603284e-75	4
Rpl10	5.33669826529236e-133	1.26772510032558	0.801	0.855	1.06194958781053e-128	4
Rps18	4.45031515664886e-112	1.26751303844115	0.777	0.853	8.85568213021557e-108	4
Atox1	0.000556012391991621	1.25824560837425	0.405	0.516	1	4
Rplp2	7.02953488971347e-137	1.24064001497242	0.832	0.891	1.39880714770408e-132	4
Cox6c	5.62598486076137e-14	1.23877617270627	0.504	0.611	1.11951472744291e-09	4
Rps5	1.14806147241196e-98	1.23462939650446	0.766	0.842	2.28452752395256e-94	4
Rps16	1.00965334957826e-175	1.22358933688362	0.865	0.915	2.00910920032578e-171	4
Rps7	8.14498752741097e-103	1.21570774714198	0.773	0.859	1.62077106807951e-98	4
Rpl12	8.74871815384496e-128	1.21495201624682	0.813	0.891	1.74090742543361e-123	4
Rpl5	7.5494205107984e-118	1.21093945175358	0.795	0.87	1.50225918744377e-113	4
Eef1b2	2.84820158795169e-40	1.20546652468015	0.629	0.743	5.66763633986507e-36	4
Rps3a1	6.13185755278645e-177	1.20295777603552	0.88	0.93	1.22017833442898e-172	4
Rps13	1.19123045030397e-126	1.20248189607103	0.82	0.892	2.37042947305987e-122	4
Rps2	2.72254231346845e-74	1.20223809370799	0.707	0.787	5.41758694957086e-70	4
Rpl27a	1.08128460368262e-190	1.20122534293655	0.91	0.961	2.15164823286804e-186	4
Rpsa	7.54260237772728e-92	1.19779153451462	0.746	0.825	1.50090244714395e-87	4
Rpl21	7.23646199335658e-162	1.19676303299361	0.88	0.93	1.43998357205803e-157	4
Rpl31	6.82298173704257e-20	1.19115856192783	0.534	0.635	1.3577051358541e-15	4
Rpl19	1.93813621800364e-168	1.18923216321378	0.87	0.925	3.85669726020545e-164	4
Rpl28	1.66798370650969e-122	1.18425294786922	0.803	0.879	3.31912077758362e-118	4
Rps11	1.31816755882742e-169	1.17940472253798	0.874	0.932	2.62302162531068e-165	4
Rps15a	7.08660861287003e-159	1.17855237749394	0.869	0.921	1.41016424787501e-154	4
Rpl23	9.41923403474202e-170	1.17550645597879	0.889	0.943	1.87433338057332e-165	4
Rpl29	1.68951650847297e-40	1.17489258147704	0.619	0.712	3.36196890021035e-36	4
Rps20	6.19120207348164e-136	1.16975976708108	0.844	0.912	1.23198730060211e-131	4
Rps25	2.18168731773652e-98	1.16847005984825	0.776	0.863	4.3413395935639e-94	4
Rpl34	1.34213833777074e-139	1.1657274387512	0.84	0.912	2.67072107832999e-135	4
Rpl17	1.98734504262914e-145	1.1624550025247	0.853	0.91	3.95461790032772e-141	4
Rps6	2.48152704352293e-84	1.16130323489236	0.744	0.843	4.93799066390629e-80	4
Rpl11	5.8306946668776e-142	1.15375778397746	0.841	0.904	1.16024993176197e-137	4
Atp5e	4.27705749606782e-10	1.14796272628721	0.492	0.61	8.51091671142535e-06	4
Rpl9	5.29878612642262e-124	1.14666314620499	0.827	0.892	1.05440545129684e-119	4
Rpl23a	6.174103850265e-61	1.13649226794489	0.7	0.803	1.22858492516423e-56	4
Rpl24	3.69569744263615e-75	1.13646264844518	0.732	0.834	7.35406834110167e-71	4
Rps3	2.71505737178048e-136	1.13580172834293	0.843	0.908	5.40269266410598e-132	4
Rps14	7.33198083322385e-158	1.13566306743695	0.878	0.943	1.45899086600321e-153	4
Rpl14	1.67130909836582e-49	1.13522981433518	0.669	0.779	3.32573797483815e-45	4
Rpl7	3.5662608201922e-99	1.13193715781184	0.775	0.855	7.09650240610045e-95	4
Rack1	3.26904681166787e-65	1.12941418054475	0.69	0.783	6.5050762505379e-61	4
Rpl15	8.80403302875195e-80	1.12657254606286	0.746	0.848	1.75191453239135e-75	4
Rpl27	0.000242167777714795	1.12656900021883	0.393	0.482	1	4
Rpl6	3.37733023806738e-107	1.12342775427122	0.812	0.888	6.72054944073028e-103	4
Rpl3	2.74257576279514e-84	1.1114407473755	0.752	0.846	5.45745151038604e-80	4
Rps17	3.38286155345486e-47	1.10462150477114	0.661	0.775	6.73155620521982e-43	4
Rpl10a	2.07507371103638e-49	1.09907748747839	0.677	0.793	4.12918917759129e-45	4
Rpl18a	8.12226915004841e-150	1.0951265982999	0.869	0.932	1.61625033816813e-145	4
Rps8	3.31192349854521e-146	1.08678326891754	0.884	0.959	6.59039656975511e-142	4
Rpl8	7.60060002748754e-77	1.0817137089138	0.747	0.853	1.51244339946975e-72	4
Snrpg	0.00380949773130379	1.06395810719964	0.149	0.211	1	4
Cd52	2.45192538469909e-08	1.05824639859466	0.457	0.532	0.000487908632301271	4
Ftl11	1.26526321991425e-85	1.05099092500289	0.835	0.918	2.51774728130736e-81	4
Eif3i	0.00159731037720971	1.04817329215326	0.169	0.247	1	4
Cox7a2l	0.000128205068354752	1.0435019636603	0.444	0.575	1	4
Anp32b	0.00996421836768788	1.0421956704731	0.183	0.255	1	4
Rps15	2.54348020389659e-77	1.03931485242453	0.754	0.877	5.06127125773382e-73	4
Pfdn5	2.48703797424238e-11	1.03755062882388	0.52	0.667	4.94895686494491e-07	4
Sh3bgrl3	1.65462838269511e-19	1.03609343635656	0.562	0.694	3.292545018725e-15	4
Nme1	1.20667862688339e-05	1.03343527367117	0.145	0.23	0.240116979963525	4
Ndufc1	5.49763876717254e-05	1.01955625957097	0.181	0.278	1	4
Rpl18	1.18612415791834e-76	1.00785036467418	0.753	0.853	2.36026846184171e-72	4
Txn1	0.00106932457238961	1.00689169122339	0.176	0.258	1	4
Cox8a	2.30806534339204e-28	0.999840148519139	0.63	0.783	4.59281922681583e-24	4
Mrps21	3.00223650471231e-07	0.98617904312306	0.146	0.246	0.00597415042072702	4
Serf2	2.99076351924689e-23	0.9853320942966	0.594	0.721	5.95132032694938e-19	4
Cox4i1	5.59057635320689e-35	0.985101662501763	0.643	0.785	1.11246878852464e-30	4
Hcfc1r1	0.000230440997762148	0.969146014481307	0.105	0.161	1	4
Anapc13	1.91912634708448e-05	0.967632595805278	0.187	0.293	0.381886951806341	4
Sdhaf4	1.0690997430636e-05	0.964724564531324	0.086	0.144	0.212740157872227	4
Myl6	7.24951657086922e-08	0.962937751451956	0.491	0.632	0.00144258130243727	4
Scp2	0.00201654932693246	0.960266382876509	0.253	0.378	1	4
Cnp	7.7440485826038e-05	0.949734348209936	0.13	0.201	1	4
2410015M20Rik	6.09860756059078e-06	0.949271922596882	0.18	0.287	0.121356191848196	4
Kif5a	2.64050703288721e-06	0.947637363191107	0.127	0.21	0.0525434494474225	4
Uqcrq	0.000338720236755016	0.939376162435606	0.257	0.396	1	4
Erh	8.46953959094169e-07	0.934353859668293	0.051	0.101	0.0168535368320149	4
Rpl7a	2.41663107325758e-22	0.931522953100794	0.615	0.779	4.80885417267525e-18	4
Ndufa3	0.000221502031211874	0.920986737802752	0.21	0.319	1	4
Cfl1	7.39679697061765e-31	0.917630055979259	0.645	0.788	1.47188862918321e-26	4
Chd3	1.52968517876151e-07	0.915216167531016	0.056	0.113	0.00304392053721752	4
Atp5o.1	1.09326021149182e-05	0.914511895460292	0.204	0.322	0.217547849484758	4
Aldh2	4.21020064828401e-06	0.907481019417987	0.076	0.133	0.0837787827002036	4
Uqcc2	5.9160399400229e-07	0.906170352818609	0.15	0.249	0.0117723278766516	4
Usmg5	5.20736981743214e-07	0.903819038464448	0.18	0.298	0.0103621451997082	4
Ndrg2	0.000317748120869598	0.903473912097876	0.145	0.217	1	4
Txndc17	3.85740561806293e-06	0.901983883167461	0.171	0.273	0.0767585143938342	4
Fis1	0.000283367404024501	0.89961612094894	0.239	0.367	1	4
Pink1	4.4460664340906e-05	0.899216463569489	0.089	0.144	0.884722759719689	4
Nop10	0.000101769096028001	0.899215216941468	0.143	0.22	1	4
Tbca	5.00624516779595e-05	0.890203152632839	0.22	0.341	0.996192725939717	4
Mif	0.000176059636834838	0.884709182971863	0.205	0.308	1	4
Ndufv3	1.23427753517395e-06	0.884291118937304	0.169	0.276	0.0245608886724263	4
Cox7a2	0.00219852892951434	0.881657951986607	0.294	0.446	1	4
Med28	3.86416109904167e-06	0.881407360788291	0.153	0.246	0.0768929417098301	4
Sec61g	0.00468070189011514	0.878482061476343	0.3	0.451	1	4
Mrps33	3.0281839402787e-05	0.877853448963604	0.21	0.328	0.602578322276059	4
Taf10	2.34804031819784e-06	0.872816127248414	0.144	0.233	0.0467236542918189	4
Map2	5.0478602954514e-08	0.868839338306735	0.071	0.138	0.00100447372019187	4
S100a13	0.000125713708857617	0.867322662951266	0.141	0.213	1	4
Pdrg1	3.17368751338621e-05	0.859615368729991	0.085	0.139	0.631532078288722	4
Fam213b	2.24856867284307e-05	0.852755603875437	0.086	0.142	0.447442680209043	4
Mrps36	4.17766662071475e-07	0.852336346406449	0.075	0.137	0.00831313880856028	4
Camk2a	0.000129503892120008	0.848568081519656	0.155	0.235	1	4
Bag1	0.000461058593818561	0.846358243440659	0.224	0.337	1	4
Calm3	1.09522562009962e-06	0.845881005695907	0.182	0.295	0.0217938946143623	4
Eif3h	0.000156890331677285	0.839677658801739	0.239	0.37	1	4
Ndufa7	4.70932453995182e-05	0.834842385047965	0.254	0.399	0.937108490205012	4
Naa38	7.97522245004187e-05	0.832639583608986	0.096	0.152	1	4
Uqcr10	7.24440884528981e-05	0.831360576960722	0.228	0.353	1	4
Naca	8.32582762830298e-10	0.831103674972558	0.563	0.744	1.65675643975601e-05	4
Atpif1	0.00891321394649206	0.830966854254654	0.35	0.538	1	4
Atp5j	0.00742103713968849	0.82953802543107	0.345	0.529	1	4
Myl12b	0.000429555280939296	0.826740517281634	0.28	0.437	1	4
Tmem256	3.46016866634858e-07	0.825800080992472	0.159	0.264	0.00688538962916703	4
Cenpx	8.24578077765322e-06	0.825495143847459	0.134	0.214	0.164082791694521	4
1810037I17Rik	4.80483595577557e-06	0.825396459664624	0.194	0.309	0.0956114306839781	4
Churc1	2.61132389298263e-07	0.824328752507869	0.056	0.11	0.00519627341464613	4
Nedd8	0.00141364755646608	0.822516400364056	0.283	0.43	1	4
Tma7	1.60219767946444e-05	0.818974848075296	0.283	0.455	0.318821316236629	4
Vkorc1	9.64564139356654e-08	0.817222816896402	0.133	0.229	0.0019193861809058	4
1810058I24Rik	9.07959096298647e-07	0.812641282835746	0.094	0.163	0.0180674780572468	4
Rexo2	3.54421765707514e-07	0.811105012860944	0.124	0.209	0.00705263871581383	4
Wdr83os	3.58517666488557e-05	0.811035713083344	0.191	0.294	0.713414304545579	4
Nsmf	1.01569521271307e-06	0.809440153523635	0.05	0.1	0.0202113190377774	4
mt-Nd6	4.81910075410579e-08	0.808271674598523	0.168	0.288	0.000958952859059511	4
Ndufb9	6.51836970331916e-05	0.808190604957979	0.297	0.474	1	4
Cstb	3.43040499535352e-08	0.808176673216318	0.143	0.246	0.000682616290025398	4
Ppp1r14b	0.00303650520270938	0.802645579082192	0.299	0.455	1	4
Ost4	8.47075536626167e-07	0.802064026516124	0.213	0.35	0.0168559561033241	4
Ldhb	1.84595132893105e-06	0.80136320669649	0.54	0.726	0.0367325854943989	4
Snrpf	1.14784076278047e-06	0.800877124560004	0.168	0.274	0.0228408833385685	4
Ubxn1	1.62665655641884e-07	0.793689692094736	0.199	0.332	0.00323688388161786	4
Use1	4.15445254097899e-08	0.790948033957503	0.157	0.267	0.000826694511129408	4
Dynlrb1	7.38951727658351e-08	0.79047001305746	0.187	0.31	0.00147044004286735	4
Atp5d	0.00020841057770126	0.790115888770758	0.239	0.365	1	4
Rpl4	4.09160864310671e-06	0.789316351721671	0.529	0.714	0.0814189203891805	4
Adh5	4.65414089329264e-09	0.789299367330522	0.141	0.251	9.26127496356302e-05	4
Gapdh	0.00881309158456856	0.786827340359222	0.489	0.666	1	4
Ndufb11	1.69555509571523e-06	0.783875832106714	0.223	0.361	0.0337398508496375	4
Blvrb	3.26089228254345e-08	0.783006121255426	0.13	0.227	0.00064888495530332	4
Sin3b	4.31851348636064e-11	0.780344345425769	0.126	0.241	8.59340998650903e-07	4
Aldoa	0.00287633260910068	0.777153112294735	0.317	0.478	1	4
mt-Nd4l1	1.63962721271591e-07	0.77702696866267	0.597	0.781	0.00326269419058338	4
Ndufb7	1.4493087530829e-09	0.775112361403423	0.195	0.341	2.88397948775965e-05	4
Atp5g1	1.75027370654761e-06	0.773836307524994	0.239	0.386	0.034828696486591	4
Ndufaf8	2.20673672552157e-07	0.770931951455914	0.075	0.139	0.00439118541011537	4
Gng5	1.37471266419736e-05	0.770092014794467	0.525	0.71	0.273554073048633	4
Snrpe	8.95315935573567e-09	0.76866838921967	0.187	0.319	0.000178158918019784	4
Tomm5	1.27087158512956e-08	0.767326051645919	0.106	0.194	0.00025289073672493	4
Taldo1	1.14299501133512e-06	0.762065420864731	0.27	0.447	0.0227444577305575	4
Cetn2	2.10293506437366e-06	0.761570277649053	0.084	0.146	0.0418463048459715	4
Eif3k	1.55699564653534e-08	0.759168897193681	0.207	0.355	0.000309826563704067	4
Srp14	7.1863587082037e-05	0.756764469960427	0.248	0.388	1	4
Edf1	2.17846086616974e-08	0.75470971205474	0.235	0.399	0.000433491927759116	4
Gnas	2.432804461788e-10	0.7522890396376	0.581	0.777	4.84103759851194e-06	4
Grap1	9.52581639809765e-10	0.750443014861267	0.161	0.285	1.89554220505745e-05	4
Selenoh	5.56286913480107e-06	0.747981958550292	0.068	0.121	0.110695532913406	4
Zmat2	1.79604917727422e-10	0.747884728875761	0.126	0.235	3.57395825785798e-06	4
Psme1	8.13655725967617e-06	0.746882994322386	0.278	0.447	0.161909352910296	4
Cox5b	1.17193225644317e-07	0.745560719997523	0.254	0.426	0.00233202799709627	4
Tpm4	5.67197205845823e-08	0.744959326150003	0.067	0.131	0.0011286657199126	4
Pkm	2.1952159304771e-07	0.743564199770906	0.238	0.391	0.00436826018005638	4
Lsm7	5.03129548710041e-07	0.743200113473405	0.079	0.143	0.0100117748897811	4
Gpm6b	6.21133435804767e-08	0.740772655077137	0.137	0.234	0.00123599342390791	4
Ndufa6	6.13605039857564e-07	0.73986329564012	0.226	0.371	0.0122101266881257	4
Atp5c1	1.17046056392495e-05	0.737193176323604	0.276	0.444	0.232909947615426	4
Aprt	2.17842015840029e-05	0.736901590570998	0.077	0.13	0.433483827320074	4
Ndufb5	2.13394133484817e-08	0.733635190092983	0.207	0.351	0.000424632986221437	4
Prdx1	0.00019787829027618	0.732736683930819	0.303	0.477	1	4
Dpm3	1.60748747882704e-09	0.732013340367704	0.142	0.251	3.19873933411792e-05	4
Fabp5	1.11902021073915e-05	0.730816522103034	0.073	0.125	0.222673831734983	4
Aldoc	0.000648934877874491	0.730604176850533	0.169	0.246	1	4
Fkbp1a	1.87645437714597e-10	0.728602602132489	0.138	0.253	3.73395656508278e-06	4
Ndufa5	4.62682452250712e-08	0.726647406277125	0.146	0.249	0.000920691811733693	4
Ckb	7.89945193584834e-29	0.722769411088448	0.698	0.848	1.57191194071446e-24	4
Aes	8.95159199250635e-09	0.722396453001676	0.169	0.292	0.000178127729058884	4
Capns1	1.80380923793725e-09	0.722022807816523	0.166	0.29	3.58940000257134e-05	4
Sptbn1	2.53821338341266e-06	0.721038456719315	0.07	0.126	0.0505079081165286	4
Psmb2	1.52921557310991e-10	0.719474949990126	0.166	0.299	3.0429860689314e-06	4
Oaz1	0.000211921052334429	0.718534621725901	0.532	0.734	1	4
Uqcrb	1.07381190851122e-07	0.716488682782657	0.258	0.428	0.00213677831674647	4
Ndufb3	2.17743322153709e-08	0.713529405838706	0.192	0.326	0.000433287436753666	4
Ggh	1.217632086909e-08	0.711703073005662	0.123	0.219	0.000242296608974022	4
Myl12a	1.30181070062393e-06	0.711069184111925	0.21	0.339	0.0259047311317157	4
Etfb	2.13065837361104e-09	0.710371442648668	0.136	0.243	4.23979709764862e-05	4
Ap2s1	1.47355062508789e-10	0.708681587513522	0.137	0.251	2.9322183888624e-06	4
Cdk5rap3	3.92466906381973e-09	0.708637789151102	0.068	0.14	7.80969897009488e-05	4
Polr2f	1.82516747683824e-08	0.706123115309208	0.093	0.171	0.000363190076216042	4
Drap1	1.60006643829396e-08	0.703446525322418	0.194	0.328	0.000318397220556115	4
Cox14	1.95032182364402e-09	0.698320207948362	0.132	0.236	3.88094539686923e-05	4
Ndufs5	4.13298991822879e-08	0.6979850800793	0.194	0.327	0.000822423663828347	4
Arl3	3.58889654827175e-07	0.697666775437131	0.054	0.108	0.00714154524140596	4
Minos1	2.62789099502994e-09	0.69621377504463	0.227	0.393	5.22924029101008e-05	4
Banf1	4.23289458071432e-07	0.694966132500572	0.101	0.176	0.00842303692616342	4
Timm17b	5.72717746877213e-06	0.694799675827127	0.066	0.118	0.113965104451097	4
Rpl22l1	2.13723803546632e-08	0.694061209164681	0.248	0.418	0.000425288996677444	4
Gngt2	0.00143655877628078	0.693328132017052	0.32	0.49	1	4
Snrpd3	1.6061477602889e-10	0.692825801793461	0.13	0.241	3.19607342819889e-06	4
Smdt1	1.74858407276424e-11	0.691347513657262	0.218	0.393	3.47950744639356e-07	4
Xlr	6.63511288889075e-10	0.690443319932603	0.153	0.272	1.32032111376037e-05	4
Ndufa11	2.550435574778e-11	0.690293468994796	0.125	0.238	5.07511175025074e-07	4
Cetn3	4.48619810555912e-09	0.689203505456503	0.147	0.259	8.92708561025209e-05	4
Eif3f	1.78889035406689e-07	0.688334674261072	0.237	0.393	0.0035597129155577	4
Nsa2	2.00253837841509e-06	0.686465481010056	0.262	0.423	0.039848511192082	4
Ywhaq	7.73007198067284e-10	0.684101452596462	0.177	0.314	1.53820702343409e-05	4
Bola2	9.05453984159529e-09	0.682192927991463	0.103	0.188	0.000180176288307905	4
Rab5c	1.99766424555544e-11	0.680731515405037	0.206	0.373	3.97515208223077e-07	4
Grcc10	2.4568153022451e-07	0.678426088981459	0.05	0.103	0.00488881676993753	4
Slirp	6.02068800500487e-12	0.678406514806047	0.086	0.182	1.19805670611592e-07	4
Higd1a	4.39202360623378e-08	0.677300921025963	0.097	0.176	0.000873968777404459	4
Npm1	0.00829033893076372	0.676138843537955	0.393	0.613	1	4
Swi5	9.24857855359475e-10	0.67389934253451	0.196	0.342	1.84037464637982e-05	4
Hprt	1.44343983484944e-08	0.673718412991395	0.185	0.313	0.00028723009273669	4
Ptma1	7.00160721588095e-17	0.672748335283897	0.667	0.846	1.39324981988815e-12	4
Pfdn2	4.69498455041371e-13	0.670570441297907	0.147	0.285	9.34254975686824e-09	4
Pgam1	3.00620880452268e-11	0.670477848601839	0.162	0.299	5.98205490011968e-07	4
Cox20	3.89107115915945e-11	0.670060955316188	0.083	0.172	7.74284249961139e-07	4
Ppdpf	1.66479130547591e-07	0.669476745026518	0.052	0.106	0.00331276821876652	4
Fcer1g	5.8504168052996e-70	0.669358500274112	0.895	0.972	1.16417444008657e-65	4
Map1lc3a	6.32228144973512e-10	0.669136989301025	0.131	0.238	1.25807078568279e-05	4
Dynll2	4.67387674607891e-11	0.667725690252127	0.141	0.261	9.30054733702242e-07	4
Snrpd2	4.17411919457874e-10	0.666042398345886	0.142	0.257	8.30607978529224e-06	4
Hdhd2	8.06704021462046e-09	0.665289952795592	0.063	0.129	0.000160526033230732	4
Fam96a	2.46314691580489e-09	0.665072277766695	0.106	0.198	4.90141604776014e-05	4
Ndufb10	2.27848471042123e-10	0.664111526218658	0.202	0.355	4.5339567252672e-06	4
Timm8b	4.51331392110852e-09	0.661527702819219	0.115	0.207	8.98104337161384e-05	4
Sptan1	2.52803033747242e-08	0.661222391218532	0.056	0.116	0.000503052756853637	4
Npc2	1.27556936564981e-06	0.660529658457329	0.583	0.789	0.0253825548070655	4
Qdpr	6.01912838828059e-10	0.660150716331211	0.083	0.166	1.19774635798395e-05	4
Psmb1	1.27964843154237e-08	0.658697638249006	0.247	0.42	0.000254637241392616	4
Mrpl33	2.095065284375e-10	0.657930386664878	0.122	0.227	4.16897040937781e-06	4
Pcbd2	5.9608358596549e-07	0.653485255686236	0.051	0.102	0.0118614672771273	4
1500011K16Rik	4.88982530067332e-08	0.652450935381039	0.089	0.164	0.000973026336580984	4
Mrpl30	2.30541395681075e-11	0.6522347836137	0.086	0.179	4.58754323265771e-07	4
Snhg6	1.55392472536143e-07	0.649442489003191	0.051	0.105	0.00309215481099671	4
Pgk1	2.11854909705609e-11	0.64768298030908	0.105	0.207	4.21570084823192e-07	4
Higd2a	1.08703462666378e-09	0.647618343030967	0.218	0.381	2.16309020359825e-05	4
Mrpl13	1.36506759120252e-07	0.645923468071957	0.07	0.133	0.00271634799973389	4
Prelid1	6.68871858406322e-11	0.644569406013214	0.118	0.226	1.33098811104274e-06	4
Sod2	9.1524803404287e-10	0.642735280719951	0.082	0.163	1.82125206294191e-05	4
Gstm1	2.45484661925398e-06	0.641781300403024	0.066	0.12	0.0488489928765349	4
Ndufa12	2.28223761977742e-11	0.640930145046568	0.138	0.259	4.54142463959509e-07	4
Brk1	0.00159125730307029	0.640205331380594	0.359	0.565	1	4
Stmn1	0.00143874301996616	0.639080803138309	0.156	0.218	1	4
Scand1	8.52228867915074e-13	0.636781608396447	0.154	0.293	1.69585022426421e-08	4
Lsm6	2.10387948096272e-09	0.633323990225037	0.172	0.3	4.18650977916772e-05	4
Polr1d	1.05800951775635e-11	0.632766941173461	0.192	0.35	2.10533313938337e-07	4
Sub1	8.2293847092717e-07	0.632229605252291	0.292	0.478	0.0163756526329798	4
Ppia	8.14037668450997e-35	0.631571300765069	0.773	0.931	1.61985355645064e-30	4
Gtf2h5	4.56257654884067e-12	0.631463178948091	0.103	0.209	9.07907107453805e-08	4
St131	2.02707634546216e-08	0.631455781713927	0.295	0.497	0.000403367921983514	4
Gpi1	1.75957406075538e-11	0.628606681418886	0.139	0.263	3.50137642349712e-07	4
Cmpk1	1.13066525844831e-11	0.628543433405466	0.132	0.251	2.2499107977863e-07	4
Cript	3.38513732200693e-14	0.627247943538553	0.1	0.215	6.73608475706158e-10	4
Elof1	4.58059746429032e-10	0.626378935605567	0.066	0.141	9.1149308941913e-06	4
Iscu	6.13768629991091e-10	0.625968262351133	0.23	0.397	1.22133819681927e-05	4
Wdr89	9.42518563845102e-10	0.625684110477463	0.058	0.128	1.87551769019537e-05	4
Cib1	2.7213438613283e-12	0.622718279151861	0.122	0.239	5.41520214965718e-08	4
Calm1	0.00159460606281183	0.621575901754424	0.563	0.786	1	4
Bax1	1.48247882238673e-08	0.621108429730001	0.238	0.402	0.000294998460866736	4
Sarnp	7.80485456827264e-14	0.619657173520544	0.088	0.195	1.55308801054057e-09	4
Ccdc124	8.49493314816701e-09	0.619421520442419	0.065	0.132	0.000169040674715375	4
Gnb1	5.01322613247005e-17	0.619162814124324	0.198	0.393	9.97581868100215e-13	4
Nhp2	1.27178803968966e-08	0.619084804799632	0.054	0.115	0.000253073102017846	4
Mrpl27	5.00492591153343e-08	0.618632636080518	0.057	0.117	0.000995930207136038	4
Pygb	1.23029185309776e-08	0.613481419258785	0.031	0.081	0.000244815775847923	4
Rnf7	2.92411018534624e-13	0.613349393655115	0.233	0.428	5.81868685782049e-09	4
Ndufb2	6.47872459995391e-10	0.611075272320614	0.095	0.183	1.28920140814483e-05	4
Ifi271	7.4163088590653e-11	0.610743092171985	0.17	0.304	1.4757712998654e-06	4
Ptn	0.000109156079692385	0.610342803276786	0.093	0.145	1	4
Ndufs6	2.56218330891938e-13	0.606335652563715	0.118	0.24	5.09848856641868e-09	4
Sf3b5	3.70282235666033e-11	0.606249447623696	0.125	0.238	7.3682462075184e-07	4
Ndufa13	2.14330308205146e-06	0.605990836835581	0.32	0.53	0.042649588029742	4
Gpx11	0.000460673818325004	0.605125685867707	0.338	0.534	1	4
Lsm4	1.861569553465e-09	0.602591293295989	0.088	0.17	3.70433725444e-05	4
Vegfb	3.54377990399947e-13	0.602107085895735	0.09	0.194	7.05176763096855e-09	4
Mrpl54	9.25821747781336e-08	0.601951067171524	0.056	0.112	0.00184229269591008	4
Mlf2	4.62523176334713e-13	0.601344407653035	0.129	0.256	9.20374868588445e-09	4
Mrpl42	3.32855715858389e-12	0.597862678590092	0.114	0.225	6.62349588986607e-08	4
mt-Nd3	1.48696844916912e-17	0.596678605005933	0.767	0.941	2.95891851700163e-13	4
Slc25a39	2.35271570249457e-09	0.596552844807307	0.076	0.152	4.68166897639395e-05	4
Srp9	7.34249614486264e-14	0.592836491889528	0.182	0.346	1.46108330786622e-09	4
Acot13	6.48772321798236e-10	0.592045023264819	0.08	0.161	1.29099204314631e-05	4
Trappc2l	2.15198269692887e-10	0.591889441684413	0.11	0.211	4.28223036861876e-06	4
Nabp2	5.96282882043097e-10	0.590397416851233	0.046	0.111	1.18654330697756e-05	4
Prdx3	2.45873509643155e-08	0.59003624328471	0.076	0.147	0.000489263696838915	4
Cox17	5.15866809858392e-16	0.589162609183452	0.117	0.251	1.02652336493721e-11	4
Ndufs4	4.2526963622447e-12	0.588230645277381	0.112	0.222	8.46244049123074e-08	4
Mrps24	1.89423065383568e-12	0.588075519452865	0.112	0.224	3.76932957806762e-08	4
Chmp2a	3.03970569770938e-12	0.587834369820977	0.174	0.322	6.04871036787189e-08	4
Hebp1	1.81302872787123e-07	0.58742154412554	0.051	0.105	0.00360774586559096	4
Ndufb6	1.55426530083186e-08	0.587252679939004	0.092	0.17	0.000309283252212532	4
Dynlt3	2.61609645666246e-12	0.587151808099743	0.087	0.185	5.20577033911263e-08	4
Cox5a	1.04998695925771e-11	0.58693853792527	0.217	0.392	2.08936905022692e-07	4
Prdx6	9.17623892696539e-07	0.584213174056525	0.083	0.146	0.0182597978407684	4
Ndufb8	4.5023162307312e-11	0.582189035311505	0.201	0.357	8.95915906753201e-07	4
Gltp	1.00392440261698e-10	0.581445603678746	0.114	0.215	1.99770916876752e-06	4
Psmb6	8.95287170261792e-14	0.581317305475004	0.187	0.353	1.78153194010394e-09	4
Sptssa	1.84162945302548e-10	0.580717730868662	0.179	0.319	3.66465844857541e-06	4
Npm3	1.00329406900855e-07	0.580494648624472	0.048	0.102	0.00199645486792011	4
Lst11	1.45102072007376e-08	0.580455968989698	0.28	0.469	0.000288738613087477	4
Anapc11	5.92032142878183e-12	0.579124017624141	0.118	0.231	1.1780847611133e-07	4
Naa10	3.02556266685463e-08	0.579026743765595	0.043	0.097	0.000602056715077403	4
Lyz2	4.43801847839166e-08	0.577046417849568	0.184	0.301	0.000883121297015156	4
Cenpb	3.41415745844024e-09	0.576976523952457	0.056	0.122	6.79383192655023e-05	4
Mtch1	2.1099557160202e-12	0.576959289525342	0.183	0.339	4.19860087930859e-08	4
Gabarapl2	1.62538360014121e-11	0.576770486740196	0.205	0.369	3.23435082592099e-07	4
Impdh2	1.51252942871458e-09	0.576639341666709	0.051	0.116	3.00978231019914e-05	4
Cycs	1.7248078380302e-11	0.574855104856267	0.114	0.22	3.43219511689629e-07	4
Dnajc15	1.31704833121006e-12	0.574353769290713	0.065	0.151	2.62079447427489e-08	4
Crybb1	0.000808536662944512	0.573611269780875	0.396	0.61	1	4
Cuta	5.29558565832878e-13	0.573075110111592	0.135	0.263	1.05376859015084e-08	4
Pfn1	4.22835990437734e-05	0.571464208585704	0.589	0.81	0.841401337372046	4
Aif1	3.31992522618894e-15	0.569738686412796	0.697	0.893	6.60631920759337e-11	4
Dstn	3.08073816644402e-15	0.56960500473843	0.205	0.391	6.13036087740695e-11	4
Cct5	1.54912721583694e-11	0.569267985108962	0.17	0.311	3.08260824679392e-07	4
Ei24	1.3471871111556e-11	0.568283167239737	0.074	0.16	2.68076763248853e-07	4
Dctpp1	8.36596795661064e-12	0.568142252883513	0.109	0.216	1.66474396368595e-07	4
Timm13	2.13896284784342e-12	0.566437280363056	0.17	0.318	4.25632217092363e-08	4
Trmt112	5.96567265206261e-12	0.561651735818764	0.187	0.338	1.18710920103394e-07	4
Khk	1.88607649133669e-09	0.561389241221167	0.115	0.21	3.75310361011087e-05	4
Coa3	1.19729713794041e-11	0.559943578348891	0.145	0.269	2.38250157478762e-07	4
Pkib	1.7308062876696e-09	0.559745984452562	0.049	0.112	3.44413143183375e-05	4
Thra	4.30563050259915e-08	0.559236070918094	0.053	0.11	0.000856777413712205	4
D8Ertd738e	1.90242434904039e-14	0.559124197660006	0.193	0.365	3.78563421215548e-10	4
Gmfg	3.29392132258565e-12	0.55908323787879	0.196	0.356	6.55457403981318e-08	4
Ube2n	6.83650921111592e-14	0.556352774022735	0.139	0.276	1.36039696791996e-09	4
Pilra	2.76595104097731e-08	0.555697947565222	0.057	0.118	0.000550396597644075	4
Atp5f1	1.5549880780113e-09	0.555081999785138	0.315	0.544	3.09427077643468e-05	4
Clta	4.96560610048342e-12	0.553772493404913	0.672	0.865	9.88105957935196e-08	4
Rgs10	1.50890951717743e-33	0.55245787646252	0.808	0.944	3.00257904823137e-29	4
Eif5a	1.42434131491916e-09	0.552286188638852	0.246	0.424	2.83429678255765e-05	4
Cfdp1	8.67738113396066e-12	0.550863292865325	0.073	0.16	1.72671207184683e-07	4
Cdc42	2.405144638823e-06	0.550543732467327	0.641	0.87	0.0478599731679389	4
Pa2g4	2.41003662063288e-11	0.547434981664084	0.097	0.195	4.79573187139737e-07	4
Nsmce1	4.85482140013034e-09	0.547144079553685	0.078	0.153	9.66060910411935e-05	4
Phyh	5.18975814642464e-08	0.546892758373026	0.054	0.112	0.00103270997355704	4
Otub1	7.60922948387045e-10	0.546088784120703	0.062	0.133	1.51416057499538e-05	4
Eno1	8.74480726860022e-16	0.545350251480483	0.105	0.231	1.74012919837876e-11	4
Tpi1	7.53451661388812e-12	0.540583035770675	0.13	0.249	1.4992934609976e-07	4
Ap1s1	5.50347067565578e-07	0.539666865472996	0.059	0.114	0.0109513562974874	4
Ssr4	0.000684259920593957	0.538644357646285	0.399	0.639	1	4
B2m	1.24045425710369e-28	0.537682716882594	0.871	0.969	2.46837992621064e-24	4
Rab18	5.83454471832635e-15	0.535202321305341	0.114	0.239	1.16101605349976e-10	4
Hist1h2bc1	1.4120440005203e-15	0.534785496393493	0.144	0.291	2.80982635663535e-11	4
Dcxr1	1.93558455904576e-12	0.533906335752717	0.066	0.154	3.85161971404517e-08	4
Nop53	8.53155722961389e-13	0.533474616217477	0.1	0.208	1.69769457312087e-08	4
Myo6	1.11163336287071e-09	0.533448837425837	0.049	0.113	2.21203922877642e-05	4
Vdac1	7.14422700730352e-16	0.53226540841024	0.136	0.281	1.42162973218333e-11	4
Eif3e	4.62778468471659e-14	0.532115690352435	0.166	0.321	9.20882874411754e-10	4
Ntan1	5.61226693653835e-13	0.532047443160133	0.06	0.146	1.11678499770177e-08	4
Mrpl12	5.89589067988722e-11	0.530436321179312	0.082	0.17	1.17322328639076e-06	4
Cuedc2	2.9730795958159e-12	0.530222408657713	0.133	0.256	5.91613108771406e-08	4
Upf3a	3.1406899771995e-09	0.529630044352887	0.049	0.111	6.24965898562929e-05	4
Ptms	1.10750088038397e-07	0.529181489479906	0.339	0.57	0.00220381600187606	4
Mrpl11	2.12447812773284e-11	0.527529593863267	0.062	0.141	4.22749902637558e-07	4
Ndufs7	3.94125614469742e-14	0.527189586750764	0.139	0.277	7.84270560233339e-10	4
Cryba41	9.41692670144256e-12	0.525523711540869	0.137	0.258	1.87387424432006e-07	4
Fkbp8	6.87654371617108e-14	0.525212997342233	0.105	0.221	1.36836343408088e-09	4
Cat	1.33021620190878e-11	0.524939945151742	0.067	0.151	2.64699722017827e-07	4
Immp1l	1.24694293638266e-08	0.524449624721234	0.062	0.127	0.000248129174910785	4
Sdhb	4.41827337364032e-14	0.524424775078002	0.134	0.267	8.79192218620687e-10	4
Psmb3	1.53940033210553e-18	0.522450132075342	0.145	0.311	3.06325272085679e-14	4
Phf5a	9.90653653711974e-13	0.522022271401295	0.091	0.193	1.97130170552146e-08	4
Rtraf	3.24487969357302e-14	0.52114502589215	0.19	0.364	6.45698610224096e-10	4
Vps28	7.80609190715627e-14	0.519992091967665	0.14	0.276	1.55333422860503e-09	4
Lsm5	3.69913233560872e-11	0.519694379403237	0.059	0.136	7.36090343462778e-07	4
Vti1b	5.00969787001964e-12	0.516850585753795	0.073	0.161	9.96879779155208e-08	4
Chmp4b	5.92616126142894e-16	0.516396841789381	0.172	0.34	1.17924682941175e-11	4
Bcl7c	4.72337091761979e-09	0.5136016777023	0.052	0.114	9.39903578897162e-05	4
Pdha1	3.85707691734111e-10	0.511037432041571	0.058	0.13	7.67519735781707e-06	4
Fnta	3.69073736251479e-11	0.51096296886964	0.086	0.176	7.34419827766819e-07	4
Esd	5.33886349934117e-13	0.510787082279832	0.143	0.274	1.0623804477339e-08	4
Bmi1	3.89153708801221e-09	0.508428686805067	0.039	0.096	7.74376965143549e-05	4
Cfap36	3.8481969229716e-08	0.507968347177579	0.036	0.087	0.000765752705702119	4
Psmb4	9.64815738659449e-17	0.507752858441084	0.158	0.324	1.91988683835844e-12	4
Eif11	8.10403146917651e-09	0.507228677818225	0.655	0.878	0.000161262122205143	4
Chmp5	3.44126173149989e-14	0.507041330978346	0.136	0.271	6.84776671951163e-10	4
Mrfap1	4.48603894823568e-10	0.506654583295612	0.303	0.527	8.92676890309418e-06	4
Cdk2ap1	2.76902783258241e-11	0.506417076793236	0.105	0.206	5.51008848405573e-07	4
Commd1	1.78360601792809e-11	0.505224776202618	0.081	0.171	3.5491976150751e-07	4
Btf3	1.07376285453335e-05	0.50462315273469	0.375	0.615	0.213668070423592	4
Gatm	1.48713453331124e-13	0.503283479138729	0.173	0.325	2.95924900783604e-09	4
Ywhae	6.39556544690618e-06	0.503035958543396	0.424	0.701	0.127265356827986	4
Ufm1	2.84012812993246e-10	0.501232115201061	0.072	0.15	5.6515709657526e-06	4
H2-T22	1.38644320457786e-09	0.500363134402774	0.037	0.095	2.75888333278949e-05	4
Mettl9	1.19005501357293e-11	0.50017357817019	0.081	0.171	2.36809047150878e-07	4
Lamtor4	1.38215238211047e-12	0.50007684334327	0.265	0.48	2.75034502516163e-08	4
Psmb5	1.37315623940108e-14	0.499074803471196	0.167	0.325	2.73244360078421e-10	4
Hagh	1.95628398911897e-09	0.498245456043123	0.061	0.13	3.89280950994784e-05	4
Glrx3	1.36101237977718e-16	0.497832514107486	0.118	0.258	2.70827853451861e-12	4
Mrps14	1.26478276657174e-14	0.49709521063813	0.136	0.275	2.51679122720111e-10	4
Vamp7	4.51951997969055e-09	0.496363033326957	0.047	0.108	8.99339280758622e-05	4
Cdc37	4.45610543403104e-17	0.496289030753753	0.156	0.318	8.86720420317838e-13	4
Cyb5a	1.88768928585941e-14	0.495360098110762	0.239	0.45	3.75631290993165e-10	4
Tprkb	3.52610980112741e-09	0.493936229412678	0.042	0.099	7.01660589326344e-05	4
Pdcd5	1.49477552850107e-18	0.493218468835272	0.138	0.296	2.97445382416428e-14	4
Tax1bp3	1.10698050067942e-10	0.493057253883254	0.07	0.151	2.20278049830198e-06	4
Sssca1	3.12393466020566e-07	0.489749784415652	0.046	0.097	0.00621631758034324	4
Apoe	0.00131291809745888	0.488711305803114	0.604	0.741	1	4
Sec61a1	4.7415877395358e-22	0.48582567823146	0.136	0.314	9.43528544290229e-18	4
Necap2	2.55439892358043e-16	0.485387190654409	0.124	0.263	5.0829984180327e-12	4
Tmem141	2.4016287190225e-11	0.484433167543543	0.08	0.169	4.77900098798288e-07	4
Lamtor2	5.94815884050395e-13	0.484048194670077	0.161	0.306	1.18362412767188e-08	4
Aip	1.42218454925168e-10	0.48265799099396	0.063	0.139	2.83000503455591e-06	4
Triap1	1.0417828693764e-09	0.481539826805823	0.066	0.14	2.07304373177209e-05	4
Tmem160	2.12637856880986e-14	0.481044634782657	0.125	0.254	4.23128071407475e-10	4
Svbp	1.45951279807426e-14	0.479639240189718	0.104	0.221	2.90428451688797e-10	4
Tcp1	1.19072154160013e-15	0.479254297044268	0.129	0.269	2.36941679563009e-11	4
Mbp1	2.68934794941794e-11	0.476996068795167	0.173	0.305	5.35153348454676e-07	4
Hras	1.3331033138846e-10	0.476828420097869	0.101	0.196	2.65274228429896e-06	4
Skp1a	3.14449753852552e-15	0.476755086744952	0.109	0.235	6.25723565191192e-11	4
Ndufa8	7.29032654447046e-16	0.476223749777576	0.162	0.325	1.45070207908418e-11	4
Snx3	5.78082317286753e-19	0.476115272942274	0.175	0.362	1.15032600316891e-14	4
Pfdn1	1.49183380292193e-10	0.474348324039852	0.072	0.152	2.96860008443434e-06	4
Pin4	3.05331924055787e-10	0.474210461565946	0.062	0.136	6.0757999567861e-06	4
Ubb	5.52933239553825e-12	0.471539594453452	0.703	0.898	1.10028185338816e-07	4
Mien1	1.68615018244634e-11	0.471167675568822	0.084	0.175	3.35527024804998e-07	4
Abhd17a	2.10315180343877e-11	0.470422664775328	0.086	0.178	4.1850617736628e-07	4
Pet1001	4.49588904167562e-13	0.469609094448851	0.096	0.202	8.94636960403032e-09	4
Nenf	1.31940715009541e-12	0.469446808310732	0.103	0.209	2.62548828797486e-08	4
Map1lc3b	1.55482603998616e-14	0.46929344134718	0.195	0.371	3.09394833696846e-10	4
H2afj	4.42722982784213e-15	0.469203968587015	0.123	0.255	8.80974463442305e-11	4
Pea15a	6.85693645623597e-18	0.468593569178593	0.135	0.288	1.3644617854264e-13	4
Nudc	1.52145218303808e-14	0.468221039601374	0.157	0.306	3.02753769902747e-10	4
Tkt	7.17404413837079e-18	0.467244635388514	0.137	0.293	1.4275630430944e-13	4
Zbtb8os	1.03635695552601e-10	0.466743973424995	0.05	0.12	2.06224670580121e-06	4
Lamtor1	1.45238994715901e-13	0.465804487839308	0.239	0.439	2.89011075585172e-09	4
Ndufb4	1.82333477949831e-15	0.464656862593223	0.182	0.354	3.62825387772368e-11	4
Pkig	4.2006421486251e-15	0.464064827333861	0.198	0.382	8.35885781154909e-11	4
Gabarapl1	8.24257630475038e-09	0.463488651677466	0.038	0.093	0.000164019025888228	4
Dad1	4.39943993516977e-12	0.462995739826205	0.296	0.53	8.75444552699432e-08	4
Tomm22	2.39515177389083e-15	0.4624849070344	0.141	0.287	4.76611251486537e-11	4
Pabpc11	3.31667606394904e-05	0.462210564322243	0.419	0.677	0.65998536996522	4
Psma7	2.79291378773869e-17	0.462066529145419	0.215	0.42	5.55761914622122e-13	4
Eif3j11	6.17478447660933e-16	0.461731769303987	0.115	0.246	1.22872036300049e-11	4
Tprgl	1.37837518224334e-12	0.461121553744257	0.118	0.233	2.74282877514603e-08	4
Fam162a	1.39004096563979e-09	0.459461743521492	0.053	0.118	2.76604251752662e-05	4
Ndufs2	3.56238009593848e-16	0.458636055832009	0.121	0.26	7.08878015290797e-12	4
Paip2	6.80823237295625e-17	0.457554008037614	0.186	0.368	1.35477015989456e-12	4
Dohh	5.74482325796946e-09	0.457419301016442	0.042	0.099	0.000114316238010334	4
Aurkaip1	6.60215771814041e-13	0.457177084959267	0.095	0.2	1.31376336433276e-08	4
Hnrnpa1	7.64168312932757e-17	0.456852214089707	0.185	0.365	1.52061852590489e-12	4
Sumo2	1.57381422235887e-15	0.456149660143503	0.267	0.503	3.13173292107191e-11	4
Pepd	1.26033613651408e-12	0.455948470040749	0.095	0.197	2.50794287804936e-08	4
Arpc5	1.46372779095625e-15	0.45478493709641	0.229	0.434	2.91267193122384e-11	4
Mrpl36	7.21213499980547e-12	0.45311688663789	0.076	0.164	1.43514274361129e-07	4
Sdhd	2.80572130739921e-14	0.45261169490807	0.09	0.198	5.58310482959369e-10	4
Hmgn1	8.02555230679375e-16	0.451465587745755	0.215	0.411	1.59700465352889e-11	4
Gm17018	1.33313838337139e-08	0.447562704241316	0.045	0.103	0.000265281206907073	4
Ap1s2	3.00188576727256e-14	0.446893925580346	0.1	0.215	5.97345248829567e-10	4
Mrpl35	3.74312766994219e-10	0.445595792056385	0.051	0.118	7.44844975041795e-06	4
Tceal9	9.45468442748532e-13	0.444901103536385	0.06	0.145	1.8813876542253e-08	4
Isyna1	3.67061980933348e-09	0.443287875002273	0.046	0.107	7.30416635859269e-05	4
Mrpl23	4.08029822779787e-16	0.443265407797808	0.126	0.264	8.11938544349498e-12	4
Ghitm	5.03168358831051e-17	0.441337332572019	0.161	0.329	1.00125471723791e-12	4
Mtx2	2.04362225000505e-11	0.440660361354585	0.056	0.133	4.06660391528506e-07	4
Arpc4	1.09901505942996e-14	0.439195784521161	0.269	0.504	2.18693006675969e-10	4
Cdk2ap2	1.62900986393098e-14	0.438854313989128	0.131	0.264	3.24156672823626e-10	4
Suds3	7.20712187427104e-12	0.438725204370157	0.048	0.122	1.4341451817612e-07	4
Nap1l1	5.2534592588924e-15	0.438028808537708	0.116	0.242	1.045385857927e-10	4
Mrpl14	2.55450061108496e-11	0.436091748855529	0.073	0.157	5.08320076599796e-07	4
Mrpl48	2.93939083489996e-12	0.434803725451565	0.068	0.155	5.84909382236742e-08	4
Ndufa9	1.50973704566287e-17	0.433810196140028	0.107	0.245	3.00422574716454e-13	4
Atp6v1g1	4.29527769075284e-11	0.433130344748403	0.319	0.567	8.54717307682908e-07	4
Mrpl21	7.12263402394931e-10	0.432829397409482	0.053	0.119	1.41733294442567e-05	4
Dnajc19	8.66774549944e-13	0.432552936046791	0.106	0.214	1.72479467693357e-08	4
Dap	7.02409791172003e-09	0.431602294617359	0.047	0.107	0.000139772524345317	4
Spop	1.27296108038524e-18	0.431117314297327	0.094	0.226	2.5330652538586e-14	4
Sparcl1	3.24615668926262e-07	0.429241021928176	0.168	0.271	0.00645952719596368	4
Rnf5	5.75228923195525e-13	0.428569020289481	0.064	0.152	1.14464803426678e-08	4
Syngr1	1.71052220581098e-07	0.427563298625155	0.344	0.576	0.00340376813734327	4
Dctn3	2.48842593102193e-15	0.427537094299649	0.095	0.213	4.95171876014054e-11	4
Pgls	6.26420293887854e-17	0.424103999724132	0.141	0.292	1.24651374280744e-12	4
Rtcb	2.36268408765858e-13	0.424046709339054	0.106	0.219	4.7015050660318e-09	4
Clu	8.29873164479047e-07	0.423908127571344	0.113	0.187	0.0165136460999686	4
Ranbp1	7.22711603645622e-17	0.42376839653543	0.141	0.291	1.43812382009442e-12	4
Abracl	8.42089050827944e-16	0.423279279071995	0.13	0.271	1.67567300224253e-11	4
Uqcrfs1	1.18404104009907e-13	0.421739665419014	0.106	0.221	2.35612326569313e-09	4
Cltb	1.62073118585498e-11	0.421322856479015	0.053	0.128	3.22509298673283e-07	4
Rnh1	5.72945885192984e-16	0.421270584175535	0.126	0.266	1.14010501694552e-11	4
Ift20	2.82324507330061e-13	0.420783133225759	0.119	0.239	5.61797537136089e-09	4
Igbp1	5.92589485679746e-12	0.419619452675361	0.093	0.191	1.17919381755413e-07	4
Ap3s1	2.25580699483697e-10	0.419194721458419	0.057	0.129	4.48883033902609e-06	4
Sod1	1.37600509977422e-13	0.417963451517823	0.087	0.191	2.73811254804073e-09	4
Syap1	4.70656891041224e-12	0.416764680057884	0.045	0.119	9.36560147482932e-08	4
Slc25a4	6.59325334679636e-18	0.416446257279582	0.226	0.443	1.31199148347901e-13	4
Rrp1	5.84982922579896e-18	0.416286191800642	0.119	0.264	1.16405751764173e-13	4
Cap1	4.82530483585748e-17	0.415624958041578	0.207	0.404	9.6018740928728e-13	4
Fam96b	3.48702253372335e-15	0.41372910161545	0.089	0.201	6.9388261398561e-11	4
Ptrhd1	9.38248319968615e-08	0.413661948998398	0.043	0.094	0.00186702033190555	4
Mrps16	7.84025780134247e-12	0.411585626043861	0.071	0.156	1.56013289988914e-07	4
Mpv17l2	9.5355017322922e-09	0.410977594473129	0.036	0.09	0.000189746948970883	4
Cotl1	8.22513997250977e-12	0.410011517255294	0.313	0.55	1.63672060312972e-07	4
Arpc1a	1.47656334504369e-13	0.409104194351087	0.105	0.218	2.93821340030243e-09	4
Zfp706	8.13258250637653e-13	0.408669333594219	0.298	0.54	1.61830259294387e-08	4
Ube2l3	2.74449958127742e-21	0.407686763941559	0.177	0.375	5.46127971678395e-17	4
Ptpn18	1.62924007398058e-07	0.407532211385344	0.372	0.63	0.00324202482321396	4
Ugp2	4.34093941852669e-13	0.407099310391586	0.067	0.158	8.63803534892626e-09	4
Rabggtb	6.23521384608725e-13	0.405741502314469	0.035	0.106	1.2407452032329e-08	4
Acadl	4.59207388655125e-13	0.404505598478674	0.069	0.16	9.13776782684834e-09	4
Polr2i	3.62628579361585e-11	0.404322077764825	0.073	0.156	7.21594610071619e-07	4
Cwc15	9.32739055477661e-21	0.403419525372166	0.147	0.323	1.856057446495e-16	4
1810022K09Rik	2.57262569196317e-15	0.402800128210206	0.073	0.177	5.11926786443751e-11	4
Sap18	4.39848669072565e-12	0.402768052378388	0.066	0.149	8.75254866587497e-08	4
Eid1	8.17599903664945e-15	0.401325954704181	0.112	0.237	1.62694204830287e-10	4
Sirt2	9.1471254156236e-17	0.400304801105258	0.132	0.279	1.82018648645494e-12	4
Psma5	8.12874437511768e-17	0.400298505411591	0.126	0.272	1.61753884320467e-12	4
Mrps18c	1.61455197183044e-13	0.400171986549641	0.085	0.187	3.21279696874538e-09	4
Ascc1	8.55651833553219e-11	0.3996524213885	0.045	0.112	1.70266158358755e-06	4
Atp1a2	1.25785692069316e-05	0.399108347674672	0.162	0.25	0.250300948648731	4
Bet1	5.07766215044914e-13	0.396535958160746	0.063	0.15	1.01040399131787e-08	4
Mcrip1	8.31644914065195e-17	0.395923834126531	0.119	0.258	1.65489021449833e-12	4
Rbx1	7.8112588378889e-18	0.39554834058023	0.259	0.496	1.55436239615151e-13	4
Psmb8	3.4009440514944e-13	0.393672890826329	0.254	0.46	6.76753856806871e-09	4
Rrp7a	4.98319278593415e-10	0.393053893302004	0.043	0.105	9.91605532473035e-06	4
Zmat5	3.51234728164154e-08	0.3926402135182	0.052	0.11	0.00069892198557385	4
Uap1	2.73724432259592e-09	0.391491912577711	0.041	0.099	5.44684247753361e-05	4
Ncbp2	7.06473167713802e-12	0.391289796785582	0.058	0.137	1.40581095643369e-07	4
Eif2s3x	1.62084469792732e-13	0.390325426469563	0.083	0.184	3.22531886440557e-09	4
Klk8	4.02603094757917e-10	0.388686459781707	0.077	0.157	8.0113989825878e-06	4
Gclm	3.44413614831904e-12	0.388607485575302	0.049	0.125	6.85348652154005e-08	4
Ndufc2	6.70056343187853e-18	0.387688745938467	0.256	0.489	1.33334511730951e-13	4
Snapc5	1.05480653146036e-15	0.384335765393647	0.08	0.191	2.09895951695297e-11	4
Polr2e	7.59430793498148e-19	0.384017181157674	0.113	0.259	1.51119133598197e-14	4
Mdh1	1.21752980948964e-19	0.383160101757075	0.181	0.377	2.42276256790344e-15	4
Eif1b	5.29777775248929e-20	0.382569113207626	0.216	0.432	1.05420479496784e-15	4
Glo1	1.50184216554751e-11	0.382537638143994	0.066	0.148	2.98851572522299e-07	4
Prmt1	5.33242120409217e-15	0.381951846418479	0.085	0.194	1.0610984954023e-10	4
Smim11	1.41481302390978e-14	0.380789587156049	0.086	0.193	2.81533643627807e-10	4
Fkbp3	4.17734549003489e-18	0.380758912541519	0.087	0.214	8.31249979062042e-14	4
Psmb10	8.30772038362058e-16	0.379376171185985	0.145	0.295	1.65315327913666e-11	4
Phgdh	2.28913343194454e-15	0.379008045214629	0.154	0.305	4.55514661622644e-11	4
Mrpl34	2.36387919299369e-14	0.376230069555672	0.089	0.199	4.70388320613814e-10	4
Akr7a5	8.84981935638414e-10	0.376124507564831	0.034	0.09	1.76102555372688e-05	4
Psmc3	3.60249684538218e-22	0.375228297141065	0.15	0.336	7.168608472626e-18	4
Scd2	2.45589864580192e-20	0.375199256434727	0.165	0.347	4.88699271528123e-16	4
Syf2	1.2592175704279e-17	0.374846957912539	0.157	0.321	2.50571704339447e-13	4
Rab7	2.39524865080391e-18	0.373976728375855	0.191	0.385	4.76630529023469e-14	4
Chchd1	6.60713379551491e-15	0.373676208477705	0.101	0.22	1.31475355396951e-10	4
Smagp	2.43143239077117e-09	0.37273921530995	0.045	0.106	4.83830731439555e-05	4
Txnl4a	4.56152404086248e-10	0.371813147900983	0.051	0.118	9.07697668891225e-06	4
Ndufs3	1.57196958160012e-17	0.371300109953121	0.111	0.248	3.12806227042608e-13	4
Rfk	1.18125555429568e-08	0.370867946454096	0.037	0.09	0.000235058042749298	4
Stard3nl	6.41191599475479e-19	0.3703275886808	0.142	0.307	1.27590716379626e-14	4
Prdx2	3.40485545114667e-18	0.369914398399401	0.157	0.325	6.77532186223675e-14	4
Mcee	1.97270428085755e-10	0.368617987749827	0.048	0.115	3.92548424847844e-06	4
Pdap1	8.80204456853936e-16	0.36841567005841	0.116	0.247	1.75151884869365e-11	4
Bri3	7.0253314426236e-13	0.366777172753697	0.311	0.557	1.39797070376767e-08	4
Ptges3	9.67729454779009e-22	0.36674019031109	0.166	0.359	1.92568484206475e-17	4
Rnf187	3.81416278250847e-15	0.36633999915629	0.1	0.219	7.5898025209136e-11	4
Ufc1	6.37634106284927e-14	0.366272153815662	0.123	0.249	1.26882810809638e-09	4
Slc25a3	3.40332421656819e-12	0.36602780346556	0.309	0.551	6.77227485854904e-08	4
Nt5c	2.43434219892309e-09	0.365836114164981	0.053	0.117	4.84409754163706e-05	4
Sms	4.84241653442331e-11	0.364297079470943	0.049	0.119	9.63592466184894e-07	4
Spcs1	2.29018514257096e-19	0.364064168129504	0.209	0.423	4.55723941520196e-15	4
Snrpd1	6.40315218018175e-17	0.363795427480359	0.106	0.238	1.27416325233437e-12	4
Ccdc90b	3.47269342075897e-14	0.363075863716887	0.061	0.153	6.91031263796827e-10	4
Mrps12	5.89362341897533e-11	0.36303401744476	0.06	0.136	1.1727721241419e-06	4
H2afv	2.75817963567918e-13	0.362720236005138	0.116	0.234	5.48850165703799e-09	4
Tbcb	4.8529178369564e-20	0.361959482818593	0.125	0.283	9.65682120375954e-16	4
Commd31	1.11949282627884e-18	0.361856663371571	0.139	0.299	2.22767877501227e-14	4
Tuba1b	3.00001318315718e-08	0.361272731907785	0.356	0.594	0.000596972623316447	4
Commd6	7.09998663483798e-15	0.359158295810346	0.104	0.223	1.41282634046641e-10	4
Ldha	3.36397203763666e-17	0.358446688367354	0.142	0.297	6.6939679576932e-13	4
Arf5	9.7406843443654e-21	0.358426081520217	0.207	0.425	1.93829877768527e-16	4
Snrnp27	5.026634898469e-20	0.358247276048617	0.08	0.21	1.00025007844635e-15	4
Mrpl22	1.64685262319871e-11	0.357825142120777	0.042	0.111	3.27707203490311e-07	4
Prkaca	2.07321444332161e-09	0.356798325114426	0.03	0.083	4.12548942076567e-05	4
Pold4	1.60842841777179e-19	0.356402766850918	0.138	0.303	3.20061170852408e-15	4
Ndufv1	1.41013776279843e-12	0.356353939074444	0.05	0.128	2.8060331341926e-08	4
Anp32e	2.70263409872353e-19	0.355727265090476	0.093	0.227	5.37797159304994e-15	4
Agpat3	4.2000216676865e-22	0.355507005173701	0.108	0.265	8.35762311652937e-18	4
Mrps28	3.16977416891011e-08	0.354847519701976	0.042	0.095	0.000630753361871422	4
Dpy30	2.06950467455428e-11	0.354422369120262	0.067	0.149	4.11810735189556e-07	4
Psmd10	1.36280144916375e-08	0.353968296471476	0.052	0.112	0.000271183860369094	4
Cpq	5.15999064775248e-10	0.352503789044506	0.033	0.09	1.02678653899627e-05	4
Nelfe	8.53203832367806e-09	0.352459590065612	0.038	0.092	0.00016977903060287	4
Sdf4	1.85242485672328e-20	0.352082237423784	0.215	0.439	3.68614022239365e-16	4
Ap4s1	2.21284788974836e-09	0.352068593886055	0.041	0.099	4.40334601581026e-05	4
BC031181	8.54506772995863e-19	0.350783610584306	0.138	0.299	1.70038302758447e-14	4
Atp5g3	7.01634708005726e-18	0.349631352203242	0.136	0.292	1.39618290546059e-13	4
Zfp771	5.08862681307736e-11	0.349445423886831	0.035	0.097	1.01258584953426e-06	4
Gmpr	2.40733814159746e-13	0.349075331327287	0.083	0.183	4.79036216796479e-09	4
Cacybp	1.10509300778489e-19	0.348804922360825	0.104	0.247	2.19902457619114e-15	4
Eif1ax	4.35079958219863e-12	0.347903077563493	0.06	0.141	8.65765608861706e-08	4
Coq2	2.803058386696e-11	0.347832903402155	0.045	0.115	5.57780588368637e-07	4
Pfdn4	4.26005761847701e-10	0.347766652377177	0.042	0.104	8.4770886550074e-06	4
Asna1	3.45614927022672e-09	0.347258783837565	0.037	0.093	6.87739143282414e-05	4
Diablo	3.97769198460279e-10	0.347237459030616	0.066	0.141	7.91520928016109e-06	4
Polr2m	1.60824906063939e-13	0.347138970418156	0.063	0.152	3.20025480576632e-09	4
Med30	1.85779468769781e-15	0.34704522293507	0.062	0.161	3.69682564904988e-11	4
Emc10	2.07741085377916e-18	0.346098982283765	0.117	0.263	4.13383985793514e-14	4
Dctn1	4.91083381638535e-14	0.346039917060112	0.063	0.155	9.77206821122521e-10	4
Cdc34	3.25689978694913e-11	0.345661239163643	0.035	0.099	6.48090488605008e-07	4
Msl3	5.34767591296893e-12	0.345485221859967	0.041	0.111	1.06413402992169e-07	4
Gtf3a	5.64857088067404e-10	0.345241219723059	0.044	0.106	1.12400911954533e-05	4
Vamp8	5.04230030190188e-16	0.34475485669478	0.278	0.521	1.00336733707545e-11	4
Polr2g	2.99709021326818e-18	0.344644621945878	0.108	0.247	5.96390981538235e-14	4
Stx8	8.41950197748623e-12	0.344241029008117	0.065	0.147	1.67539669849998e-07	4
Hat1	1.08119008806712e-08	0.343843557376596	0.039	0.093	0.000215146015624475	4
Cebpzos	1.73468762218366e-17	0.342916670081384	0.182	0.362	3.45185489938326e-13	4
1110059E24Rik	7.50957588974941e-09	0.342461645923207	0.039	0.094	0.000149433050630124	4
Ech1	1.48054512632858e-17	0.342290646442464	0.105	0.238	2.94613674688124e-13	4
Ptpa	7.8441217398531e-14	0.341795023984537	0.083	0.184	1.56090178501337e-09	4
Chmp3	1.53072632381215e-16	0.340933483872482	0.126	0.266	3.04599231175379e-12	4
H2afz	0.00111330894374037	0.339814469348755	0.397	0.608	1	4
Pafah1b3	3.1402900741092e-08	0.337623349604931	0.049	0.106	0.00062488632184699	4
Rheb	1.79725032129862e-21	0.337578762770299	0.138	0.311	3.57634841435212e-17	4
Ufd1	6.0957981632977e-09	0.337273403825124	0.051	0.112	0.000121300287651461	4
Washc3	1.06726283682507e-12	0.337066417886855	0.064	0.15	2.12374631899821e-08	4
Ak11	3.73829193990264e-13	0.3363914165593	0.062	0.149	7.43882713121227e-09	4
Rbm3	4.67881550943018e-20	0.334499914758151	0.136	0.302	9.31037498221512e-16	4
Klc1	2.81015319731874e-09	0.333747980878208	0.037	0.093	5.59192384734456e-05	4
Ube2a	3.03983264492636e-14	0.333612229549146	0.074	0.174	6.04896298013896e-10	4
Eif3m	5.09240913675998e-20	0.333360633229216	0.144	0.312	1.01333849412387e-15	4
Khdrbs3	5.11631507832538e-15	0.333099022489976	0.101	0.218	1.01809553743597e-10	4
Psd3	2.22554378206999e-10	0.332904713741171	0.026	0.081	4.42860957194107e-06	4
Atp5b	7.30840449194828e-22	0.330843074927508	0.273	0.55	1.45429940985279e-17	4
Ppp1ca	1.78879042836969e-19	0.330408821459901	0.236	0.465	3.55951407341284e-15	4
Maged1	6.64304106336503e-13	0.32985103834008	0.06	0.145	1.32189874119901e-08	4
Mobp1	1.54592894457165e-09	0.327583128756408	0.063	0.132	3.07624400680313e-05	4
Gde1	1.68175077351578e-16	0.326816728137742	0.091	0.211	3.34651586421906e-12	4
Etfa	1.03701427041959e-12	0.323613557992717	0.058	0.142	2.06355469670794e-08	4
Hmgn2	9.88466706957219e-13	0.322725605545391	0.078	0.172	1.96694990017417e-08	4
Gm2a	8.51704678880458e-20	0.322643018243798	0.151	0.324	1.69480714050422e-15	4
Chrac1	4.12617494078311e-18	0.322497933029899	0.089	0.216	8.2106755146643e-14	4
Dcps	7.26621563231706e-09	0.321432386847339	0.035	0.089	0.000144590424867477	4
Pcmt1	2.71085162669713e-24	0.321105544553401	0.107	0.273	5.39432365196462e-20	4
Rwdd1	4.72834410260372e-17	0.320180323040959	0.085	0.203	9.40893192977114e-13	4
Trappc3	4.60856578306514e-15	0.319913996468944	0.08	0.187	9.17058505172133e-11	4
Hars	1.04252934964902e-10	0.319177332914736	0.026	0.083	2.07452915286659e-06	4
Psenen	2.18340395539661e-19	0.318572272222015	0.236	0.47	4.3447555308437e-15	4
Arpc2	4.74919900231041e-05	0.318302508409781	0.481	0.763	0.945043109469748	4
Renbp	6.95434526228554e-13	0.318059470817358	0.064	0.151	1.3838451637422e-08	4
Snrpc	2.94678169238764e-19	0.317975373034074	0.086	0.216	5.86380088968217e-15	4
AI413582	1.00227972909285e-09	0.315719714972278	0.066	0.139	1.99443643292187e-05	4
Tm2d1	3.49237744480348e-13	0.314926999520968	0.083	0.181	6.94948187741444e-09	4
Nadk2	1.40384417884662e-09	0.313684567261009	0.031	0.085	2.79350953148689e-05	4
Dazap1	2.63975667130422e-11	0.313532676241292	0.05	0.123	5.25285180022826e-07	4
Ergic3	1.23964807159072e-24	0.313112371505669	0.193	0.419	2.46677569765838e-20	4
Josd2	1.6854677018068e-09	0.312315112060229	0.033	0.087	3.35391217982534e-05	4
Mrpl51	7.84234886907857e-19	0.312223417192416	0.085	0.211	1.56054900145795e-14	4
Capzb	6.67430522533927e-11	0.311759962019041	0.348	0.608	1.32811999679026e-06	4
Hax1	1.39915250549252e-11	0.311123633169802	0.036	0.103	2.78417357067958e-07	4
Snu13	1.55101419397753e-22	0.310398006881212	0.115	0.279	3.08636314459589e-18	4
Dynll1	1.35076605545906e-18	0.310239191977712	0.247	0.475	2.68788937375799e-14	4
Ostf1	6.61220645672665e-23	0.310130302669345	0.222	0.462	1.31576296282404e-18	4
Sae1	1.69325301545009e-11	0.310018120682347	0.037	0.103	3.36940417544413e-07	4
Emc6	1.56232269972957e-17	0.309005090106547	0.104	0.237	3.10886594019187e-13	4
Hmgb1	5.48750760892579e-13	0.308889640082195	0.383	0.682	1.09195913910014e-08	4
Ndufab1	2.40220745041132e-21	0.308333880902504	0.146	0.325	4.78015260557348e-17	4
Ctss	7.46074009502223e-07	0.306777600066766	0.933	0.996	0.0148461267150847	4
Thrsp	8.43675652670255e-14	0.30671508781966	0.091	0.197	1.67883018124854e-09	4
Uqcrc1	6.77753974074314e-19	0.306656477975195	0.085	0.213	1.34866263301048e-14	4
Ola1	6.2814993182603e-14	0.305370362003796	0.066	0.158	1.24995554934062e-09	4
Anxa3	5.52488735811609e-06	0.302823749499337	0.469	0.757	0.109939733539152	4
Imp4	4.89667769002716e-13	0.30281703877206	0.076	0.17	9.74389893538505e-09	4
Epn1	4.61427680890838e-24	0.30274864998786	0.126	0.305	9.18194942204679e-20	4
Aldh1l1	9.05390182261877e-42	2.84627125061926	0.073	0.012	1.80163592368291e-37	5
Slc4a4	1.2796910836617e-255	2.821879462027	0.395	0.062	2.54645728737842e-251	5
Mboat2	1.78845387656318e-40	2.80046853030337	0.065	0.01	3.55884436897306e-36	5
Tmem47	6.85761707986592e-191	2.79759977956551	0.334	0.058	1.36459722272252e-186	5
Dbx2	3.1971990047904e-48	2.79273957528714	0.083	0.014	6.36210629963241e-44	5
Mlc1	3.39483849742689e-125	2.77576394638809	0.219	0.037	6.75538912602978e-121	5
Luzp2	1.98044535453519e-122	2.7752188349923	0.212	0.036	3.94088821098958e-118	5
Scg3	9.53346410710175e-234	2.76713808806806	0.37	0.059	1.89706402267218e-229	5
Fam171b	2.20073747392179e-116	2.73405552777546	0.19	0.03	4.37924749935697e-112	5
Scrg1	1.22629970734292e-62	2.73318362855712	0.122	0.022	2.44021378764167e-58	5
Hsd11b1	7.01896627685088e-50	2.70967415829456	0.093	0.017	1.39670409943056e-45	5
Pla2g7	8.70617518807484e-208	2.70259857152267	0.346	0.058	1.73244180067501e-203	5
Sox2	1.11882027754522e-60	2.7001538780448	0.115	0.021	2.22634047028722e-56	5
Clu1	0	2.69262760427305	0.654	0.158	0	5
Slc6a11	1.31859653286649e-114	2.68410949056991	0.18	0.027	2.62387524075102e-110	5
Aqp4	7.93655349864503e-167	2.67834348220128	0.26	0.04	1.57929478069537e-162	5
Gpc5	4.22155222051211e-52	2.66355425249202	0.093	0.016	8.40046676359705e-48	5
Cldn10	1.08396748604035e-140	2.653357478653	0.21	0.03	2.15698690047169e-136	5
Acsbg1	3.8403438377012e-85	2.64129694923071	0.163	0.03	7.64190020264161e-81	5
Ntrk2	2.20614583994459e-187	2.63889558704452	0.348	0.064	4.39000960690574e-183	5
Igfbp2	1.92002847071069e-52	2.61879237870185	0.084	0.013	3.82066465386721e-48	5
Cxcl14	1.89213815279692e-118	2.59840339909419	0.219	0.039	3.76516571025058e-114	5
Itgb8	8.36093431256628e-59	2.59680521864879	0.101	0.017	1.66374231885756e-54	5
Fjx1	3.26755751863966e-68	2.59588878388038	0.114	0.018	6.50211270634107e-64	5
Id4	2.60980804854109e-73	2.58769434801602	0.153	0.03	5.19325703579192e-69	5
Sparcl11	0	2.58535295683325	0.766	0.239	0	5
Agt	1.24728852625576e-32	2.57961199903534	0.063	0.012	2.48197943839635e-28	5
Nkain4	4.43997785380305e-42	2.54944838623184	0.082	0.015	8.83511193128269e-38	5
Slc25a18	9.61945292094272e-62	2.5483819805988	0.117	0.021	1.91417493673839e-57	5
Rgcc	8.53020282960728e-46	2.51222614038804	0.1	0.02	1.69742506106355e-41	5
Slc1a2	0	2.49809864790908	0.944	0.473	0	5
Acsl6	1.25463447572637e-87	2.48015613699811	0.171	0.031	2.4965971432479e-83	5
Ncan	6.63523898701204e-53	2.4681518467493	0.123	0.026	1.32034620602553e-48	5
Atp1b2	2.51867680297902e-159	2.45532948554363	0.28	0.048	5.01191497024795e-155	5
Timp4	1.15044772320785e-80	2.45236037749373	0.146	0.025	2.28927592441131e-76	5
Hepacam	4.85924463743608e-71	2.43090515462297	0.133	0.024	9.66941090403405e-67	5
Gpm6a	1.05164275189086e-191	2.42675473441247	0.42	0.091	2.09266391198763e-187	5
Sox9	1.37487178264445e-53	2.41515900705731	0.124	0.026	2.73585736028419e-49	5
Aldoc1	1.76261481927385e-228	2.40764240409566	0.675	0.219	3.50742722887304e-224	5
Grm3	5.31192133244862e-29	2.38885457377528	0.067	0.014	1.05701922594395e-24	5
Fxyd1	3.29224484775289e-73	2.38313410608785	0.152	0.029	6.55123802254348e-69	5
Hopx	1.17726402018246e-81	2.37896059204779	0.211	0.049	2.34263767376108e-77	5
Gja1	1.73371272846403e-184	2.35938131090356	0.32	0.054	3.44991495837057e-180	5
Gpr37l1	1.95964326665189e-133	2.35917788203515	0.259	0.048	3.89949413631061e-129	5
Rftn2	1.52563400253324e-30	2.35471854071481	0.071	0.015	3.03585910164088e-26	5
Ptprz1	6.76215240229088e-184	2.34078396473473	0.374	0.075	1.34560070653186e-179	5
Ttyh1	5.59520799687431e-161	2.33127957961868	0.382	0.087	1.11339043929802e-156	5
Tst	6.02956637090859e-48	2.31635484113432	0.122	0.028	1.1998234121471e-43	5
Mmd2	2.98929104809364e-62	2.30884483745018	0.153	0.034	5.94839025660153e-58	5
Plpp3	1.63379045607939e-196	2.30407300364708	0.438	0.098	3.25107962855238e-192	5
Cadm2	5.48196691661172e-68	2.29673022280835	0.131	0.024	1.09085659673657e-63	5
Ddah1	1.13900813339862e-54	2.2905105902375	0.128	0.027	2.2665122846499e-50	5
Kcnk1	7.57618982025489e-32	2.28622946459214	0.071	0.015	1.50758601233252e-27	5
Lcat	5.1813356202869e-28	2.27803625563256	0.063	0.013	1.03103397508089e-23	5
Fgfr3	5.53725289510363e-48	2.27755801744073	0.108	0.022	1.10185795359667e-43	5
Ptn1	6.53092716217609e-205	2.26664510503526	0.503	0.124	1.29958919600142e-200	5
Klf9	2.08609825127144e-25	2.26637661932964	0.082	0.022	4.15112691020503e-21	5
Pcdh10	4.6688038467542e-45	2.24777803883383	0.096	0.019	9.29045277465617e-41	5
Fabp7	8.17856058585961e-72	2.24094732260436	0.21	0.054	1.6274517709802e-67	5
Tagln3	3.62521849915427e-39	2.22015684874671	0.102	0.024	7.21382229146708e-35	5
Cspg5	1.48559481337571e-126	2.21538633730964	0.281	0.059	2.95618511913632e-122	5
Mdk	1.3366038959447e-26	2.20626100545219	0.07	0.016	2.65970809254037e-22	5
Ntsr2	1.61722772987723e-102	2.19675490249794	0.227	0.046	3.21812145968271e-98	5
Lhx2	7.38978825501369e-27	2.19491711102845	0.084	0.022	1.47049396486517e-22	5
Fermt2	1.41616067391408e-55	2.19063577786416	0.136	0.03	2.81801812502163e-51	5
Fabp51	6.07651333886537e-126	2.18407099724702	0.387	0.108	1.20916538930082e-121	5
Prnp	4.07682087683193e-91	2.1813907605575	0.254	0.064	8.11246586280785e-87	5
Prex2	2.73667485943156e-63	2.15921758776899	0.172	0.041	5.44570930278285e-59	5
Gstm11	5.80202867931011e-110	2.1531380312756	0.36	0.105	1.15454568689592e-105	5
Baalc	4.12967660213736e-64	2.14461725203855	0.179	0.044	8.21764347059314e-60	5
Atp1a21	7.85844433358079e-251	2.13909315929304	0.702	0.221	1.56375183793924e-246	5
Pantr1	1.56087900658779e-71	2.13739932895519	0.197	0.048	3.10599313520905e-67	5
Slc6a1	6.18147025055623e-74	2.13478025101405	0.162	0.032	1.23005076515818e-69	5
Fam107a	8.26751589884879e-59	2.13462778921425	0.185	0.05	1.64515298871192e-54	5
Cmtm5	5.42153943046547e-52	2.13207325379242	0.131	0.029	1.07883213126832e-47	5
Timp3	8.82322454884805e-38	2.12223175120472	0.113	0.029	1.75573345297527e-33	5
Plxnb1	1.79107345902274e-25	2.11687590906799	0.066	0.015	3.56405707610935e-21	5
Mt3	2.22379576729835e-171	2.10952750755742	0.64	0.234	4.42513119734699e-167	5
Htra1	7.28634436425992e-115	2.08647708867054	0.231	0.044	1.44990966504408e-110	5
Nrcam	8.49922897375461e-49	2.07582842372289	0.117	0.025	1.69126157348743e-44	5
Chchd10	4.77413535636338e-88	2.05581984510392	0.269	0.072	9.50005194562749e-84	5
Bcan	5.61397049931844e-82	2.03887288849365	0.197	0.043	1.11712398965938e-77	5
Chst2	4.14315207464004e-47	2.03376422234056	0.155	0.043	8.24445831332622e-43	5
Rorb	8.73326309894337e-55	2.03161424944164	0.123	0.025	1.73783202405874e-50	5
Gprc5b	1.39452153892811e-24	2.0302116118214	0.079	0.021	2.77495841031305e-20	5
Tmem229a	3.88963116945832e-39	2.01687246646381	0.119	0.031	7.73997706410511e-35	5
Cnn3	3.58287523008367e-27	2.00242238441923	0.092	0.026	7.12956342034349e-23	5
Mt2	1.59167216351737e-110	1.99563945032477	0.398	0.123	3.16726843818322e-106	5
Fam213a	8.81064376865753e-78	1.98773232772663	0.258	0.073	1.75323000352516e-73	5
S100a16	1.03226789507732e-46	1.98734209746696	0.146	0.039	2.05410988441435e-42	5
Phyhipl	1.65161123760267e-41	1.97871557614083	0.117	0.028	3.28654120170555e-37	5
Ednrb	3.31564139780576e-43	1.96531964005617	0.128	0.032	6.59779481749367e-39	5
Nrxn2	1.52396312286114e-24	1.95836263436023	0.083	0.023	3.03253421818139e-20	5
Gstm5	1.27472902889774e-106	1.9375168007448	0.424	0.143	2.53658329460361e-102	5
Gabrb1	1.38115917824919e-40	1.92650537092962	0.106	0.024	2.74836864879807e-36	5
Pfkm	3.90534255569814e-25	1.92021297691817	0.087	0.025	7.77124115158372e-21	5
Gjb6	1.81150163670995e-36	1.91249972945594	0.096	0.022	3.60470710688914e-32	5
Tril	7.78341510156631e-46	1.91218960158334	0.102	0.021	1.54882177106068e-41	5
Car2	2.40337472693299e-65	1.90509574496239	0.255	0.08	4.78247536912395e-61	5
Enho	6.02674881407411e-52	1.88548642026305	0.187	0.054	1.19926274651261e-47	5
Paqr8	1.83032592693486e-36	1.87524720352624	0.128	0.037	3.64216556200767e-32	5
Nckap1	1.82646323091153e-31	1.86906332544503	0.109	0.031	3.63447918319085e-27	5
Gpm6b1	2.88240276096594e-138	1.86487698096047	0.567	0.21	5.73569325404613e-134	5
Nnat	2.75537366998972e-52	1.85836189234803	0.224	0.075	5.48291806591254e-48	5
Fez1	6.54495264331617e-35	1.85209704671773	0.124	0.036	1.30238012649348e-30	5
Kcnj10	1.05239583947911e-40	1.84800418090715	0.152	0.045	2.09416248097949e-36	5
Asrgl1	8.49655095597343e-63	1.8413115781985	0.244	0.076	1.69072867472915e-58	5
Cpe	1.32946875049435e-168	1.81698179670672	0.778	0.375	2.64550986660871e-164	5
Nrxn1	3.78438497401335e-82	1.81617282731435	0.231	0.057	7.53054765978917e-78	5
Ndrg21	1.14101678418282e-123	1.79485965737213	0.532	0.196	2.27050929884539e-119	5
Sash1	4.93750383109049e-32	1.78779813619015	0.141	0.047	9.82513887348698e-28	5
Nedd4	1.96738482152626e-30	1.78707328990191	0.127	0.04	3.91489905635511e-26	5
Mtss1l	9.16916925694586e-23	1.77791231386914	0.105	0.035	1.82457299043966e-18	5
Abhd3	8.8369613435471e-23	1.76037259210232	0.106	0.036	1.75846693775244e-18	5
Lsamp	8.52803726184392e-57	1.75479916039386	0.162	0.039	1.69699413473432e-52	5
Scd1	6.62761236783573e-22	1.74546319494031	0.088	0.028	1.31882858507563e-17	5
Mfge8	3.99277871332799e-55	1.72436694918268	0.238	0.08	7.94523036165137e-51	5
Sfxn5	1.46194933240766e-33	1.71607422822122	0.148	0.049	2.909132976558e-29	5
Ezr	9.8770171325135e-19	1.71550356968344	0.079	0.026	1.96542763919886e-14	5
Prdx61	1.55382414933616e-69	1.69421340051735	0.348	0.131	3.09195467476402e-65	5
Acsl3	1.31807607651212e-69	1.68287159084544	0.245	0.071	2.62283958465146e-65	5
Fbxo2	4.18987255108052e-22	1.66755839828387	0.095	0.031	8.33742738939512e-18	5
Abat	2.52288073819081e-22	1.66456138655704	0.083	0.025	5.0202803809259e-18	5
Ntm	7.13721019709052e-39	1.611557650745	0.132	0.036	1.42023345711904e-34	5
Pmm1	2.99643582905668e-33	1.6020085462295	0.176	0.065	5.96260765623989e-29	5
Nr2f1	2.09937457859594e-21	1.60199011201793	0.082	0.025	4.17754547394807e-17	5
Pfn2	3.64583720711181e-15	1.60176454095552	0.088	0.034	7.2548514584318e-11	5
2900052N01Rik	3.8843662190051e-14	1.60002079575764	0.083	0.032	7.72950033919825e-10	5
Fut9	5.82227566015853e-22	1.55205414881701	0.076	0.022	1.15857463361495e-17	5
Gnao1	1.89653186042592e-43	1.5454244941006	0.18	0.057	3.77390874906155e-39	5
Dio2	9.91780741745887e-21	1.53315542807285	0.082	0.025	1.97354449800014e-16	5
Idi1	1.63301233218676e-18	1.52355539769632	0.115	0.046	3.24953123981843e-14	5
Csrp1	1.89438086580435e-26	1.50228296295183	0.148	0.056	3.76962848486407e-22	5
S100a1	2.24438997074795e-30	1.49978987591732	0.206	0.087	4.46611160279134e-26	5
Metrn	9.10752848033288e-19	1.49918670530329	0.128	0.054	1.81230709230144e-14	5
Mt1	2.83013235819769e-120	1.49134370357163	0.833	0.543	5.63168037957758e-116	5
Lix1	2.19948600237087e-17	1.45800522760578	0.117	0.048	4.3767571961178e-13	5
Amer2	1.43281546382024e-16	1.45639021370548	0.088	0.032	2.85115949145589e-12	5
Trim9	4.07959603238442e-18	1.43354894480235	0.076	0.025	8.11798814484177e-14	5
Aplp1	1.89667606213776e-34	1.42858791098179	0.201	0.078	3.77419569604794e-30	5
S100b	2.21496022031353e-29	1.4225840134761	0.176	0.069	4.40754934240189e-25	5
Gfap	8.91261085860981e-18	1.40028688589915	0.122	0.051	1.77352043475477e-13	5
Tubb2b	2.76881045606099e-43	1.38388972119197	0.376	0.193	5.50965592651576e-39	5
Apoe1	2.48623112540099e-180	1.36606751962352	0.972	0.72	4.94735131643543e-176	5
Adk	1.92043817111197e-15	1.34799324787732	0.128	0.059	3.82147991669571e-11	5
Dbi	2.87598985389949e-76	1.34790836025962	0.668	0.425	5.72293221027459e-72	5
Sdc4	2.35169978224363e-25	1.34010816279625	0.188	0.082	4.67964739668659e-21	5
Hmgn3	5.40109013750564e-14	1.31779619057217	0.084	0.033	1.07476292646225e-09	5
Scd21	2.13817093271085e-75	1.31453449696554	0.593	0.322	4.25474633900132e-71	5
Nfib	4.91224189951898e-14	1.31044873002617	0.097	0.041	9.77487015585282e-10	5
Slc39a12	5.44935285326301e-18	1.29411797436337	0.127	0.054	1.08436672427081e-13	5
2310022B05Rik	5.13762124260694e-11	1.28667729740292	0.101	0.049	1.02233525106635e-06	5
Ncam1	1.7805354447319e-17	1.28522175891686	0.087	0.031	3.54308748147201e-13	5
Tspan7	1.4255070228308e-80	1.27567313377509	0.672	0.399	2.83661642473101e-76	5
F3	1.74333577778496e-17	1.26574809997683	0.088	0.031	3.4690638642143e-13	5
S1pr1	9.95653300129205e-34	1.23475539485929	0.286	0.136	1.9812505019271e-29	5
Syt11	4.18571504293467e-26	1.21669853225767	0.245	0.121	8.32915436393571e-22	5
Tmod2	1.52647811059861e-11	1.18962411828077	0.095	0.043	3.03753879228017e-07	5
Ahcyl1	7.84816796854101e-34	1.15803016294363	0.367	0.2	1.56170694405998e-29	5
Slc1a3	3.81141489292252e-76	1.12191261196467	0.729	0.486	7.58433449542651e-72	5
Epas1	3.46951246108071e-11	1.11673553132772	0.095	0.044	6.90398284630451e-07	5
Hmgcs1	6.59955082936031e-18	1.09705885947481	0.245	0.139	1.31324461953441e-13	5
Slc41a1	2.79612158949203e-11	0.978864902121247	0.115	0.057	5.56400235093019e-07	5
Rida	2.01850586370066e-10	0.957944422594053	0.144	0.08	4.01662481817795e-06	5
Kif1a	7.9204709979666e-11	0.946397155584144	0.097	0.046	1.57609452388537e-06	5
Rcn2	7.72272358486176e-27	0.941003868711404	0.396	0.24	1.53674476615164e-22	5
Myo61	1.88673049363169e-12	0.891439878476182	0.184	0.105	3.75440500927771e-08	5
Dclk1	9.33203649870804e-23	0.888239485819551	0.14	0.054	1.85698194287791e-18	5
Pygb1	1.50225592308608e-08	0.857634855254571	0.13	0.075	0.0002989339061349	5
Chpt1	2.26900067082909e-10	0.824354728624189	0.233	0.154	4.51508443488281e-06	5
Ugp21	4.89742914232801e-07	0.798159362123033	0.209	0.149	0.00974539425031851	5
Mras	4.06394251266675e-08	0.752231680096563	0.185	0.122	0.000808683920595557	5
Glud1	1.59779649332592e-15	0.668377219375788	0.427	0.311	3.17945524206925e-11	5
Mgll	1.45937854359344e-12	0.666476345291621	0.356	0.256	2.9040173638966e-08	5
Msmo1	5.16409019834963e-08	0.659490960214678	0.19	0.126	0.00102760230856959	5
S100a131	1.48914508217474e-10	0.657313805509541	0.293	0.204	2.96324979901951e-06	5
Kif1b	5.3523863613553e-12	0.656692689643517	0.35	0.251	1.06507136204609e-07	5
Id21	9.64811435227617e-12	0.652776373047652	0.245	0.155	1.91987827495944e-07	5
Sptbn11	1.55606609280502e-06	0.631537221746347	0.174	0.119	0.0309641591807272	5
Thrsp1	2.42908803985228e-06	0.629803893673946	0.247	0.187	0.0483364229050205	5
Glul1	1.47343415412186e-42	0.60579995948111	0.912	0.803	2.93198662328708e-38	5
Zbtb20	1.14186325089678e-12	0.528526871317159	0.465	0.354	2.27219368295951e-08	5
Ramp1	9.68489909033327e-10	0.522362866867434	0.339	0.246	1.92719806998542e-05	5
Clcn3	1.91442636116698e-07	0.504716812955274	0.324	0.25	0.00380951701608617	5
Pcsk1n	9.11733658026728e-08	0.489806876268059	0.194	0.128	0.00181425880610739	5
Agpat5	5.20922643349555e-05	0.481610204151063	0.205	0.154	1	5
Map21	1.2781764124633e-05	0.474353499930222	0.184	0.131	0.254344324316072	5
Agpat31	3.10696040013213e-05	0.454114450894631	0.308	0.252	0.618254050022293	5
Ank2	3.78600534113636e-07	0.444515745532626	0.303	0.228	0.00753377202832725	5
Tspan3	2.33571272127544e-07	0.437641828736521	0.448	0.38	0.004647834744066	5
Lrrc58	2.02857463583629e-06	0.43321748595008	0.355	0.289	0.0403666066785064	5
Gabbr1	0.000129134420664934	0.409432535318922	0.237	0.185	1	5
Nfia	4.49100213016544e-05	0.409095521425039	0.364	0.309	0.893664513881622	5
Aplp2	3.32094306753358e-07	0.407317116437257	0.343	0.269	0.00660834461008508	5
Slc25a41	2.60188330501619e-08	0.406812891802522	0.501	0.425	0.000517748758865172	5
Mbp2	3.43939007651255e-07	0.404768188487255	0.373	0.292	0.00684404231325232	5
Fads1	0.000166511533209976	0.399658837483136	0.229	0.179	1	5
Mid1ip1	2.03693007467528e-06	0.394978883015007	0.373	0.302	0.0405328715559634	5
Ckb1	6.77899440252205e-19	0.394108859429485	0.894	0.835	1.34895209615786e-14	5
0610012G03Rik	7.90630248729384e-05	0.384939274583898	0.313	0.26	1	5
Hist1h2bc2	7.4732432274052e-05	0.368552628929283	0.338	0.278	1	5
Ndufb91	4.1124852895552e-09	0.362117475986037	0.541	0.458	8.18343447768589e-05	5
Ndufc21	2.44884840100986e-07	0.32964851992584	0.536	0.47	0.00487296343316951	5
Sept7	1.06767302093056e-07	0.320169835505476	0.587	0.514	0.00212456254434973	5
Uqcr11	4.04052363582018e-06	0.316661899228412	0.484	0.418	0.0804023798291857	5
Camk2n1	4.01701207771565e-05	0.304244296084638	0.443	0.387	0.799345233344636	5
Pgam11	0.000183824802372856	0.301578838498571	0.341	0.287	1	5
Ifi211	5.18054614314588e-205	7.38773120425521	0.073	0.001	1.0308768770246e-200	6
Ifi208	1.3974051647208e-161	7.12781475482009	0.065	0.001	2.78069653727791e-157	6
Oas3	4.97091173768317e-160	6.8267461482778	0.063	0.001	9.89161726681574e-156	6
Cxcl10	1.87797894253379e-116	6.75534238167702	0.103	0.008	3.736990297748e-112	6
Oasl1	0	6.71507769111604	0.146	0.002	0	6
Rsad2	0	6.59965694643441	0.221	0.007	0	6
Ifi206	0	6.42148067858387	0.21	0.004	0	6
Ifi213	0	6.27782955471808	0.158	0.003	0	6
Iigp1	3.04526138096904e-295	5.82974944622573	0.153	0.005	6.0597656219903e-291	6
Ifit2	0	5.82439442595111	0.456	0.021	0	6
Ifit1	0	5.72441882398797	0.271	0.011	0	6
Ifit3b	0	5.66409400001542	0.269	0.007	0	6
Ifi207	0	5.54915829619987	0.257	0.01	0	6
Tgtp2	1.71154308487161e-132	5.54323112614356	0.062	0.001	3.40579958458601e-128	6
Ifit3	0	5.52060496799851	0.571	0.03	0	6
Zbp1	0	5.21980785712582	0.304	0.01	0	6
Oasl2	0	5.19557837510716	0.544	0.026	0	6
Ifi204	0	5.07678977287377	0.526	0.031	0	6
Mx1	0	5.04466923555237	0.277	0.015	0	6
Slfn5	0	5.01222441815308	0.601	0.034	0	6
Usp18	0	4.94769687013094	0.397	0.021	0	6
Oas2	1.87760879291645e-231	4.93048464333341	0.139	0.006	3.73625373702444e-227	6
Irf7	0	4.86300455494878	0.436	0.023	0	6
Ifi214	1.72513159209575e-181	4.82004373065854	0.111	0.005	3.43283935511133e-177	6
Phf11a	4.96449122507854e-188	4.81258096258717	0.113	0.005	9.87884108878378e-184	6
Isg15	0	4.770138178671	0.62	0.046	0	6
Ifi209	0	4.5632797430115	0.383	0.023	0	6
Cmpk2	2.28188749722485e-181	4.51175840064654	0.121	0.006	4.54072793072773e-177	6
Ms4a4c	5.70811306936352e-180	4.50484315470698	0.155	0.011	1.13585741967265e-175	6
Siglec1	4.56761658323603e-97	4.43231655661406	0.062	0.003	9.08910023898138e-93	6
Ccl5	1.73244000342543e-81	4.35655408215237	0.084	0.008	3.44738236281626e-77	6
Ifi47	2.90499221304249e-83	4.22526693880475	0.059	0.003	5.78064400473324e-79	6
Gm4951	1.17484439030031e-297	4.06464138085517	0.276	0.022	2.33782285225858e-293	6
Ifitm3	0	4.04054066221873	0.719	0.1	0	6
Isg20	8.31258578015302e-266	4.00521301474971	0.211	0.014	1.65412144439265e-261	6
Gbp4	7.84084912416349e-71	3.95626205969538	0.06	0.004	1.56025056721729e-66	6
Fgl2	2.76904174924606e-240	3.94734748081001	0.241	0.021	5.51011617682473e-236	6
Nlrc5	2.20895467294639e-131	3.91503773293843	0.121	0.01	4.39559890369602e-127	6
Gbp2	7.4462486766496e-148	3.85225951115487	0.187	0.022	1.4817290241665e-143	6
Samd9l	1.2021329982995e-267	3.85008124943544	0.298	0.03	2.39212445331617e-263	6
Helz2	3.17756410344992e-113	3.72815811062055	0.091	0.006	6.323034809455e-109	6
Oas1a	2.59205755799115e-115	3.65980795726247	0.11	0.009	5.1579353346466e-111	6
Plac8	1.44086578072765e-154	3.54860727650232	0.17	0.017	2.86717881706996e-150	6
F830016B08Rik	2.02777306290943e-68	3.51821330910968	0.069	0.006	4.03506561788348e-64	6
Ccl12	1.09860796086542e-174	3.50805341211755	0.698	0.278	2.1861199813261e-170	6
Cybb	2.06236491936011e-69	3.47913696209029	0.105	0.015	4.10389995303469e-65	6
Rtp41	0	3.3748426802436	0.716	0.097	0	6
Sp100	0	3.29947921104033	0.534	0.069	0	6
Trim30b	2.48682807330697e-212	3.2843535153279	0.256	0.028	4.94853918307354e-208	6
Phf11b	2.20328250207838e-303	3.24049456938886	0.435	0.06	4.38431185088578e-299	6
C4b	1.69666420902197e-61	3.15510980363343	0.087	0.011	3.37619210953282e-57	6
Rnf213	0	3.01868861372358	0.639	0.117	0	6
H2-Q6	1.92844965927537e-78	3.00436852695154	0.143	0.024	3.83742197699206e-74	6
Scimp	1.27829333683799e-55	2.98665938747388	0.09	0.013	2.54367591097392e-51	6
Phf11d	1.21167607384503e-227	2.95451303967603	0.394	0.064	2.41111421934422e-223	6
Xaf1	0	2.88909863681739	0.596	0.105	0	6
Ly6a	9.89100129044853e-219	2.83412578016064	0.401	0.069	1.96821034678635e-214	6
H2-Q71	1.32714719855247e-110	2.79739718837627	0.25	0.05	2.64089021039956e-106	6
Axl	3.7056055663855e-72	2.76941031265823	0.134	0.022	7.3737845165505e-68	6
Il2rg	2.30008316557966e-32	2.76107079233572	0.075	0.015	4.57693549118697e-28	6
Stat1	0	2.74667388269316	0.778	0.21	0	6
Slfn9	6.7278819637596e-102	2.73735749000856	0.2	0.035	1.33878123196852e-97	6
Trim30c	4.58002772452167e-87	2.68923167876544	0.149	0.023	9.11379716902567e-83	6
Stat2	7.86172498156276e-212	2.67294624528878	0.388	0.066	1.56440465408117e-207	6
Ddx60	6.94186679974811e-125	2.65878355409652	0.242	0.042	1.38136207448188e-120	6
Ccl21	6.02050750008116e-68	2.646599685649	0.214	0.055	1.19802078744115e-63	6
Ube2l6	4.10290594350105e-98	2.642497551676	0.163	0.024	8.16437253697274e-94	6
Ifi27l2a1	1.1974743032866e-305	2.62268629988333	0.679	0.157	2.38285411611001e-301	6
Parp14	1.0631697129035e-246	2.60257201332077	0.719	0.22	2.11560141170667e-242	6
B430306N03Rik	1.6166234926586e-64	2.59948845663289	0.129	0.023	3.21691908804136e-60	6
Sdc31	7.55303682785731e-235	2.59096930214575	0.525	0.113	1.50297879837533e-230	6
Dhx58	8.94326147383405e-131	2.56460754906509	0.225	0.035	1.77961960067824e-126	6
Bst21	4.11947457686655e-263	2.49811825188248	0.896	0.426	8.19734246050674e-259	6
Irgm1	6.12026510834956e-208	2.49660773820735	0.52	0.122	1.21787155391048e-203	6
BC147527	4.69378564110797e-90	2.48301152565823	0.145	0.021	9.34016404724075e-86	6
Cd72	1.01671717255362e-52	2.4752618411913	0.118	0.023	2.02316550166444e-48	6
Slfn21	3.79810277742338e-277	2.46922372677301	0.74	0.206	7.55784471679479e-273	6
Herc6	2.14385642555148e-193	2.42362340354563	0.547	0.142	4.2660599012049e-189	6
Tnfsf10	6.28553696630926e-60	2.39391865127088	0.117	0.02	1.25075900092588e-55	6
Lgals3bp2	2.14437731097164e-283	2.38038900978339	0.868	0.353	4.26709641110248e-279	6
Fcgr4	1.72564974735272e-81	2.37872303995659	0.184	0.036	3.43387043225718e-77	6
Cd274	6.60281868625787e-33	2.31336754751108	0.08	0.017	1.31389489037845e-28	6
Ddx58	4.51745221006968e-157	2.29719985447504	0.433	0.105	8.98927815281766e-153	6
Trim30a	7.81074791636979e-279	2.27325045331783	0.83	0.289	1.55426072787842e-274	6
Tor3a	4.61072894954226e-145	2.25370431344574	0.47	0.129	9.17488953669414e-141	6
Gm54311	8.42261250400345e-87	2.23094569233218	0.208	0.043	1.67601566217165e-82	6
Pml	1.80032459997213e-88	2.21495055691674	0.232	0.051	3.58246592148454e-84	6
Clec2d	1.64053110283616e-120	2.17505051754348	0.409	0.114	3.26449284153368e-116	6
Tnf1	1.58619125005623e-32	2.09936138700937	0.128	0.037	3.1563619684869e-28	6
Eif2ak2	1.57969031836744e-176	2.09279601169665	0.605	0.186	3.14342576451938e-172	6
Vcam1	1.32963557643496e-18	2.07741695888942	0.079	0.024	2.64584183354793e-14	6
Ifih1	8.87921707533871e-116	2.07620604117854	0.345	0.084	1.76687540582165e-111	6
Gbp5	1.60806899614325e-33	2.06209084607676	0.156	0.05	3.19989649542546e-29	6
Slfn8	2.78604602262739e-172	2.04172851020225	0.647	0.212	5.54395298042624e-168	6
Fam241a	3.17699674829632e-37	2.01565110212775	0.073	0.013	6.32190582943485e-33	6
Mthfr	1.89589275929339e-47	1.98450799677798	0.132	0.03	3.77263700171792e-43	6
Trim34a	3.27739300577051e-93	1.92119011988039	0.316	0.085	6.52168434218274e-89	6
Trim30d	8.60430218209361e-160	1.89081752313407	0.591	0.185	1.71217009121481e-155	6
Tap11	2.10694780985344e-112	1.83781974920765	0.454	0.143	4.19261544682735e-108	6
Gbp3	1.67886169914149e-47	1.82347309084348	0.174	0.048	3.34076689512165e-43	6
Igtp	4.51076059513295e-104	1.81676173184466	0.401	0.119	8.97596250825506e-100	6
Gbp9	7.44346945789591e-63	1.81497748734994	0.197	0.049	1.48117598742671e-58	6
Parp9	1.63703866579387e-113	1.81212618434815	0.43	0.127	3.25754324106322e-109	6
Ifi35	7.30495408492919e-105	1.81108167856425	0.411	0.125	1.45361281336006e-100	6
Prr5l	2.16998503543699e-26	1.80572027536607	0.091	0.025	4.31805322201606e-22	6
Sass6	2.93550465448094e-66	1.80569689138432	0.253	0.073	5.84136071195162e-62	6
Gm4070	2.17923625666833e-45	1.80165228560414	0.156	0.041	4.33646222714432e-41	6
Parp12	2.50551850827281e-80	1.78180924883689	0.314	0.092	4.98573127961206e-76	6
Socs1	2.75799284007114e-27	1.76999372999588	0.08	0.019	5.48812995245756e-23	6
Slamf8	1.40199130122887e-27	1.73650844577332	0.124	0.039	2.78982249031532e-23	6
Cd74	7.23412673988967e-20	1.73321561631434	0.128	0.049	1.43951887997064e-15	6
Adar	9.66519252978977e-81	1.70576528597152	0.335	0.102	1.92327666150287e-76	6
Ehd1	8.85907727785699e-15	1.69958507828939	0.077	0.027	1.76286778752076e-10	6
Kdr	1.32376793356672e-20	1.68907787730972	0.083	0.025	2.63416581100442e-16	6
H2-T24	1.16944962496941e-56	1.68770817828015	0.212	0.059	2.32708780872664e-52	6
H2-Q41	2.70178959673968e-49	1.68095967310006	0.212	0.065	5.37629111855229e-45	6
Gm462241	2.91115866667739e-54	1.66958255118929	0.221	0.065	5.79291463082134e-50	6
Parp10	1.98849600217222e-47	1.65542450928183	0.16	0.042	3.9569081947225e-43	6
Ccrl21	2.38628262009077e-19	1.63179255414966	0.124	0.048	4.74846378571863e-15	6
H2-K11	1.68626323065138e-159	1.62815951688632	0.923	0.602	3.35549520267317e-155	6
Cst7	1.006560274992e-20	1.62524643944949	0.12	0.044	2.00295429120658e-16	6
Tspo	7.38117801080667e-72	1.61959964217629	0.477	0.199	1.46878061237042e-67	6
Epsti1	2.50657907325137e-107	1.61904255493974	0.501	0.173	4.98784169786291e-103	6
H2-T231	3.04751301550696e-114	1.60435649661457	0.696	0.316	6.0642461495573e-110	6
Dtx3l	2.12550708810054e-83	1.6029951440009	0.384	0.126	4.22954655461126e-79	6
Gdap10	4.94313047401988e-27	1.58074266898409	0.107	0.031	9.83633533025216e-23	6
Nampt	5.15652359939336e-57	1.55344021720669	0.307	0.108	1.02609663104329e-52	6
E130102H24Rik	2.40922208870913e-21	1.54523240979883	0.105	0.035	4.79411103432229e-17	6
Csf1	2.87321591179619e-51	1.5006799444899	0.219	0.067	5.71741234288323e-47	6
Ncoa7	4.85595008551961e-22	1.4965027403136	0.131	0.048	9.66285507517546e-18	6
Slc25a22	1.5182293260621e-30	1.48588775948561	0.105	0.028	3.02112453593097e-26	6
Casp4	2.68434185263291e-39	1.48366683462422	0.203	0.069	5.34157185255423e-35	6
Tpst1	1.52725121123161e-23	1.47219724125921	0.107	0.034	3.03907718522979e-19	6
Enpp4	1.11619909610438e-27	1.47119780352785	0.129	0.042	2.2211245813381e-23	6
Trim25	2.08675019353209e-46	1.46317468024442	0.222	0.072	4.1524242101095e-42	6
Znfx1	3.06111239399949e-69	1.45397306023664	0.463	0.191	6.09130755281958e-65	6
Creb5	6.41092459211444e-19	1.45322302167358	0.101	0.036	1.27570988458485e-14	6
Samhd1	7.64277427239332e-76	1.43139162680021	0.518	0.219	1.52083565246355e-71	6
Treml2	4.11580562211481e-25	1.42813075020734	0.11	0.034	8.19004160744627e-21	6
Sp110	9.16852990989827e-64	1.41461690067656	0.425	0.173	1.82444576677066e-59	6
Papd7	1.97708285209432e-31	1.41208769624983	0.169	0.059	3.93419716738249e-27	6
Tmem106a1	1.95909366562539e-36	1.39988923304134	0.195	0.068	3.89840048522796e-32	6
Dck	4.76961356690589e-24	1.39516058857973	0.149	0.056	9.49105403678604e-20	6
Trim14	3.64074987754306e-37	1.37151282014542	0.18	0.059	7.24472818132294e-33	6
Cxcl16	1.94912067995951e-21	1.36982288748319	0.259	0.133	3.87855524105143e-17	6
H2-D11	1.28016894503127e-122	1.33936472965891	0.903	0.608	2.54740818371773e-118	6
Trim12c	4.04037287811816e-65	1.33099403621064	0.394	0.148	8.03993799016732e-61	6
Gpr841	8.76186741578172e-20	1.30001930163379	0.461	0.31	1.7435239970664e-15	6
Ly6e	2.52151706908386e-210	1.29348907630501	0.983	0.855	5.01756681576997e-206	6
Daxx	9.72913205845408e-33	1.29192874723668	0.179	0.062	1.93599998831178e-28	6
Mov10	1.4070897205436e-28	1.28611504723202	0.135	0.043	2.79996783490972e-24	6
Hspa1b1	2.23541819149851e-23	1.28303713103371	0.177	0.074	4.44825865926288e-19	6
Ms4a6c1	8.397773749452e-47	1.28059702365592	0.404	0.186	1.67107299840345e-42	6
Ccnyl1	8.77719100377301e-16	1.27006136227307	0.082	0.028	1.74657323784079e-11	6
Trim12a	6.07518330146455e-69	1.25529627182815	0.539	0.246	1.20890072515843e-64	6
Cd521	2.15694141418824e-59	1.22918395877655	0.762	0.516	4.29209772009319e-55	6
Cdkn1a2	1.66876072185179e-86	1.22834941554717	0.651	0.298	3.32066696041288e-82	6
Nmi	1.33500004780387e-35	1.21680894916065	0.245	0.096	2.65651659512493e-31	6
Irf1	3.65613032109659e-39	1.21604557192779	0.274	0.109	7.27533372595011e-35	6
Clic4	1.01860896787431e-09	1.19863929666157	0.111	0.056	2.0269299851731e-05	6
Trafd1	3.41071585636977e-47	1.17344663082377	0.405	0.184	6.7869834825902e-43	6
Mitd1	3.75650795649056e-28	1.16782652533323	0.205	0.083	7.47507518262057e-24	6
Nectin4	4.68261274567834e-33	1.1638449010688	0.242	0.098	9.31793110262532e-29	6
Ccdc861	1.07517156709381e-30	1.15505735331921	0.264	0.117	2.13948390135997e-26	6
Fcgr1	6.51363575009769e-100	1.15490574517954	0.906	0.652	1.29614837791194e-95	6
1600014C10Rik	5.01178029208387e-28	1.14491323054523	0.195	0.077	9.97294160321768e-24	6
Parp3	1.54060068338973e-10	1.12343008832065	0.094	0.043	3.06564129987722e-06	6
Etnk1	3.36767437289704e-59	1.11769614084749	0.671	0.389	6.70133523462782e-55	6
Asb13	4.25399268723076e-22	1.11731404131034	0.179	0.076	8.46502004832049e-18	6
Ogfr	3.17908715371752e-43	1.10922167816006	0.314	0.127	6.3260655271825e-39	6
Nod1	1.13586448729422e-19	1.10783679813845	0.083	0.025	2.26025674326677e-15	6
Rnf114	4.17813629920254e-38	1.1062511535715	0.305	0.129	8.31407342178314e-34	6
Rnf31	3.84261766115421e-24	1.10257180640611	0.156	0.059	7.64642488393077e-20	6
Zc3hav1	5.02163864390473e-37	1.07728834014165	0.345	0.158	9.99255873750602e-33	6
H2-T221	1.74231359221859e-34	1.07626274663756	0.224	0.085	3.46702981715577e-30	6
Psme2	7.1560473675362e-46	1.07267876340705	0.508	0.26	1.42398186566603e-41	6
Gpr65	8.32727986517973e-14	1.07051983455895	0.084	0.032	1.65704542037211e-09	6
Gm11772	9.39395891170024e-17	1.06958330049626	0.091	0.032	1.86930388383923e-12	6
Marcksl11	2.6386237596422e-12	1.05811394551592	0.184	0.1	5.25059741931201e-08	6
Lgals9	4.105720900092e-65	1.05738893488071	0.702	0.403	8.16997401909308e-61	6
Zufsp	3.76563939037868e-51	1.04729651842969	0.606	0.333	7.49324582291454e-47	6
Pttg1	6.14730160520868e-28	1.04722781694056	0.291	0.139	1.22325154642047e-23	6
March5	1.08842586298605e-33	1.04257389551696	0.377	0.188	2.16585862475594e-29	6
Psme11	1.02107833711401e-56	1.0407065449047	0.702	0.423	2.03184378302316e-52	6
Uba7	1.92463011806441e-40	1.03390511739431	0.27	0.104	3.82982147193637e-36	6
AW112010	1.31070911594679e-16	1.0297198950446	0.158	0.072	2.60818006982251e-12	6
Map3k81	6.49174903199444e-19	1.01040810331303	0.166	0.073	1.29179313987657e-14	6
Tiam1	4.7307869600601e-21	1.00995040142148	0.174	0.075	9.4137929718236e-17	6
Sap30	3.61045988013067e-20	1.00186507547295	0.191	0.087	7.18445411547201e-16	6
Gbp71	8.12275742980939e-36	0.999230610770098	0.443	0.231	1.61634750095777e-31	6
H2-M31	1.83706170392004e-34	0.977813331712896	0.353	0.169	3.65556908463048e-30	6
Psmb9	2.53524072330009e-42	0.972953843713688	0.436	0.212	5.04487551529485e-38	6
Il15ra	1.8735850292369e-16	0.968099395303123	0.129	0.054	3.7282468496785e-12	6
Bbc31	2.19015245655474e-17	0.966455680607956	0.2	0.099	4.35818437329828e-13	6
Tmem184b	8.82680036220954e-28	0.951725936209809	0.264	0.12	1.75644500407608e-23	6
Irgm2	9.50509006559973e-32	0.951706196005342	0.304	0.137	1.89141787215369e-27	6
Shisa5	1.20473344619697e-46	0.932253325262559	0.56	0.298	2.39729908458735e-42	6
Pnpt1	1.26517461654597e-11	0.928776538236021	0.115	0.054	2.51757096946482e-07	6
Smim3	3.93900845768528e-10	0.928206101744528	0.1	0.047	7.83823292994793e-06	6
Hspa1a2	2.56185373309305e-15	0.927012780910193	0.166	0.081	5.09783274348185e-11	6
Lrch3	6.14983492123406e-29	0.91565132798133	0.333	0.164	1.22375565097636e-24	6
Tdrd7	1.38684643178873e-29	0.908251571912104	0.222	0.09	2.75968571461639e-25	6
Trim21	3.31219240571375e-16	0.906353495200187	0.113	0.044	6.59093166812978e-12	6
Ccl41	5.07254495339508e-12	0.906146025090484	0.139	0.07	1.00938572027609e-07	6
Tlr31	4.74975314329547e-31	0.899133388205555	0.498	0.287	9.45153377984365e-27	6
Dopey21	6.08380863201731e-27	0.898983366400993	0.297	0.144	1.21061707968513e-22	6
Ms4a6b1	2.99201345804045e-43	0.896727454972008	0.64	0.376	5.95380758015469e-39	6
Isoc1	5.61389838869566e-18	0.886720875472293	0.152	0.065	1.11710964036655e-13	6
Slc15a32	4.36126760762373e-39	0.881378927094501	0.664	0.421	8.67848641241047e-35	6
Cd47	7.79187266055927e-52	0.880171376552424	0.757	0.487	1.55050474072469e-47	6
Nfkbiz1	1.55531087020325e-09	0.879822186283759	0.131	0.07	3.09491310061745e-05	6
Tapbpl	2.53356930140007e-17	0.873399674776251	0.193	0.093	5.04154955285601e-13	6
Mmp21	1.59255324268542e-17	0.873135308499678	0.169	0.077	3.16902169761972e-13	6
Usp25	9.23295490910364e-33	0.864566820059296	0.412	0.212	1.83726569736253e-28	6
9930111J21Rik2	7.88699245382794e-44	0.86147087082711	0.733	0.5	1.56943262838722e-39	6
Irf91	2.09061745560812e-37	0.859705772842194	0.401	0.191	4.16011967491461e-33	6
Parp11	4.46917487558992e-08	0.853192605190136	0.11	0.058	0.000889321108493638	6
Sp140	1.48632426967857e-19	0.85149436366873	0.177	0.078	2.95763666423339e-15	6
Rnase6	1.4322197991384e-19	0.845275782009837	0.155	0.064	2.84997417830551e-15	6
Psmb101	5.06943536045453e-28	0.84139643081347	0.471	0.276	1.00876694237685e-23	6
Apobec3	7.82593649006263e-37	0.839497313822428	0.544	0.311	1.55728310215756e-32	6
Themis2	1.13411737125088e-24	0.836768464220056	0.263	0.124	2.25678015705213e-20	6
9930111J21Rik1	7.29107557736679e-14	0.835962677606453	0.108	0.045	1.45085112914022e-09	6
Trmt10a1	2.55581408671721e-08	0.833778282694451	0.129	0.073	0.000508581445115857	6
Fam46a1	1.19388197762294e-39	0.832107046126074	0.64	0.393	2.37570574727188e-35	6
Bcl2a1a1	1.15825718132485e-14	0.831950078473912	0.169	0.083	2.30481596511832e-10	6
Hck	1.50709464099811e-31	0.828626862478435	0.581	0.357	2.99896762612213e-27	6
Ankle2	1.63937289733026e-35	0.803930110768751	0.489	0.261	3.26218812839748e-31	6
Slc31a21	1.1546822274026e-24	0.803147602396933	0.278	0.134	2.29770216430844e-20	6
Psmb81	1.80451146781435e-38	0.796874809482425	0.674	0.435	3.59079736980377e-34	6
Tlr21	4.27405136058526e-10	0.794576559684394	0.298	0.198	8.50493480242861e-06	6
Nfxl1	6.63614706662378e-24	0.787787702033615	0.298	0.15	1.32052690478747e-19	6
Mrps18b	2.62204106342262e-13	0.779717217266281	0.193	0.103	5.21759951210467e-09	6
Chmp4b1	1.8471375681419e-30	0.776903287797926	0.54	0.319	3.67561904684557e-26	6
Trpm21	7.92255751538079e-22	0.773807079421842	0.295	0.154	1.57650971998562e-17	6
Glrp11	1.63322657837183e-15	0.773538714370732	0.181	0.089	3.24995756830211e-11	6
Ccnd11	9.72459982083835e-30	0.772978520053702	0.624	0.409	1.93509811834862e-25	6
Gm100761	1.17220154520517e-33	0.771399478917731	0.525	0.296	2.33256385480377e-29	6
Apobec1	4.02343432773684e-21	0.76934302675035	0.29	0.15	8.00623196876353e-17	6
Il151	1.81249269317093e-11	0.768576564248439	0.132	0.066	3.60667921014084e-07	6
Pik3ap1	7.92129121625287e-17	0.761248681616328	0.205	0.102	1.57625773912216e-12	6
Aida	3.10382910493664e-08	0.755572495636448	0.167	0.1	0.000617630953591342	6
Pla2g16	8.75048695918173e-13	0.738275341653759	0.129	0.06	1.74125940000757e-08	6
Tap2	9.89874106688335e-22	0.724076263857439	0.354	0.197	1.96975048489912e-17	6
Anxa5	2.00656080357061e-08	0.718973632550439	0.146	0.083	0.000399285534302516	6
Synj1	4.65082470131399e-22	0.718353890560352	0.376	0.213	9.2546760731447e-18	6
Icam11	6.37512122760279e-17	0.706391997169607	0.395	0.248	1.26858537308068e-12	6
Hpcal11	3.25021248937882e-10	0.694847661853738	0.127	0.065	6.46759783261492e-06	6
Tgm21	1.03896953160544e-09	0.688374983065219	0.127	0.066	2.06744547094166e-05	6
Sulf21	1.94053619142591e-09	0.688175308704113	0.148	0.082	3.86147296731842e-05	6
Mvp	2.88712062041344e-13	0.686354786421424	0.172	0.088	5.7450813225607e-09	6
Ppm1k	1.34264368091061e-10	0.686168468313479	0.158	0.085	2.67172666064402e-06	6
Dcp2	3.642580993723e-17	0.684433138158602	0.256	0.137	7.2483719194094e-13	6
Psme2b1	1.83331460264736e-15	0.681727108286831	0.162	0.075	3.64811272780799e-11	6
Aen1	6.6450652106702e-12	0.668365463139827	0.162	0.085	1.32230152627126e-07	6
Milr1	1.02640957476688e-12	0.665695284341846	0.183	0.097	2.04245241282862e-08	6
Pcgf5	1.44241061004956e-08	0.66194225057757	0.142	0.08	0.000287025287293763	6
Keap1	1.21399586049746e-16	0.660788265725051	0.238	0.124	2.4157303628039e-12	6
Rfc3	2.57724637491946e-08	0.655823178557783	0.143	0.082	0.000512846256145224	6
Trim56	1.03228210057267e-20	0.648551893864099	0.309	0.164	2.05413815192956e-16	6
Rufy3	1.18992183159097e-11	0.647003078375574	0.203	0.115	2.36782545268287e-07	6
Hk21	5.70221786502715e-28	0.646683348067307	0.716	0.495	1.13468433296175e-23	6
Sh3bp21	6.25454623738104e-12	0.644022794150423	0.181	0.098	1.24459215577645e-07	6
Hlx	7.20799356580752e-08	0.640186447171275	0.148	0.086	0.00143431863966004	6
Nab1	2.06410335815351e-13	0.635695359716322	0.153	0.075	4.10735927238967e-09	6
Abhd15	1.7719927010754e-10	0.635690852978926	0.131	0.066	3.52608827586995e-06	6
Pvt11	6.91826939767027e-11	0.634491852359311	0.134	0.068	1.37666642744241e-06	6
Tor1aip1	8.71838823706024e-28	0.633581970978914	0.7	0.488	1.73487207529262e-23	6
Mb21d1	2.97822442698872e-13	0.62833080470903	0.224	0.125	5.92636878726484e-09	6
Icosl	5.64662820751922e-14	0.625774189362441	0.245	0.137	1.12362254701425e-09	6
Glrx	1.25919885903907e-09	0.621142069913274	0.118	0.06	2.50567980960184e-05	6
Gm420471	1.1251910068195e-09	0.619571308140213	0.111	0.055	2.23901758447012e-05	6
Hps5	5.09392645426353e-08	0.613673192044775	0.143	0.083	0.0010136404251339	6
Mybbp1a	2.87481455432628e-14	0.605559075913792	0.274	0.156	5.72059348165387e-10	6
Nfkbia1	5.40469800459057e-17	0.60509034530213	0.496	0.336	1.07548085593348e-12	6
P2rx41	2.60895891603451e-18	0.603681234525624	0.333	0.187	5.19156734701708e-14	6
Dnajc251	1.07628306595531e-06	0.597413271245179	0.162	0.102	0.0214169567294448	6
Hivep1	7.01998585817552e-07	0.597310868793769	0.149	0.092	0.0139690698591835	6
Daam1	4.12407008815893e-09	0.596792119604733	0.132	0.072	8.20648706842746e-05	6
Nsmaf	6.63016434978773e-11	0.59551860035696	0.221	0.13	1.31933640396426e-06	6
Ankfy1	1.9888907956702e-20	0.595387715238322	0.418	0.245	3.95769379430414e-16	6
Nfkbib	6.03319153840575e-08	0.59059373138373	0.132	0.075	0.00120054478422736	6
Oraov11	5.71885495739856e-08	0.589191591849189	0.124	0.068	0.00113799494797274	6
Stard3	6.27658086620245e-27	0.587114253007072	0.54	0.312	1.24897682656563e-22	6
Susd62	4.84322309129261e-18	0.58535595039523	0.373	0.22	9.63752962936316e-14	6
Relb1	2.5317426216865e-07	0.584913407418396	0.128	0.074	0.00503791464289396	6
Cited21	3.24532845223554e-07	0.583115850438186	0.281	0.197	0.00645787908710349	6
Slc12a9	2.32441028438545e-20	0.578584128782522	0.457	0.275	4.6253440248986e-16	6
AU020206	7.20266868536166e-16	0.577082358709574	0.291	0.165	1.43325904170012e-11	6
Bco2	1.52033974450691e-08	0.576365120676149	0.15	0.086	0.000302532405759429	6
Tapbp	2.83961377845366e-16	0.575232143801772	0.516	0.36	5.65054745774494e-12	6
Sgk3	4.68173177720005e-15	0.57393290891569	0.335	0.201	9.31617806345038e-11	6
Naa25	1.96580417728208e-10	0.573600955955142	0.135	0.069	3.9117537323736e-06	6
Capg1	1.51558875221333e-06	0.573407471740095	0.16	0.102	0.0301587005802931	6
Mvb12a	3.63152658340811e-09	0.570733374035181	0.165	0.094	7.22637474832381e-05	6
Myo1c	3.95590773328527e-08	0.569847567721983	0.127	0.07	0.000787186079846436	6
Tcof1	2.32288466319633e-14	0.567889189584503	0.243	0.135	4.62230819129437e-10	6
Gm170181	2.64031243544401e-09	0.567772363827829	0.167	0.095	5.25395771529003e-05	6
Tmem219	6.30036745531518e-20	0.567408324211434	0.39	0.225	1.25371011993317e-15	6
1190002N15Rik	3.46944165821486e-08	0.565898664161045	0.129	0.072	0.000690384195568176	6
Morc3	9.83594454174772e-24	0.565191558666195	0.577	0.369	1.95725460436238e-19	6
Camkk2	6.89879848725892e-14	0.563930717377784	0.257	0.146	1.37279191097965e-09	6
Lacc11	4.49207605853017e-22	0.556232133104331	0.554	0.352	8.93878214886918e-18	6
Cpd	1.83200504816245e-08	0.555156070532219	0.256	0.171	0.000364550684533846	6
Epha21	1.27438087624157e-10	0.552870910156725	0.176	0.098	2.5358905056331e-06	6
Ttc39b	2.14746351050887e-11	0.551802563632853	0.233	0.137	4.2732376395616e-07	6
Spata5	4.10106784491838e-08	0.55127605330603	0.125	0.069	0.000816071490460309	6
Ogfrl1	4.91571944887158e-17	0.550621017929786	0.586	0.403	9.78179013130956e-13	6
Bax2	3.71351680408898e-24	0.550392364320965	0.598	0.381	7.38952708845667e-20	6
Galk21	4.46369581207786e-06	0.545486106943859	0.134	0.083	0.0888230829645373	6
Grn	6.88395407688855e-43	0.545448103769147	0.956	0.87	1.36983802176005e-38	6
Plin2	1.16544374940798e-07	0.543245368465211	0.149	0.088	0.00231911651694694	6
Ccng11	9.75410297491756e-15	0.542917345976996	0.304	0.182	1.94096895097884e-10	6
Ccnd3	1.29657036667004e-12	0.541768142073099	0.281	0.169	2.58004537263672e-08	6
Hmox2	3.72902521988045e-17	0.539715599220776	0.502	0.333	7.4203872850401e-13	6
Abcg1	8.69656708842976e-15	0.539494538520928	0.364	0.228	1.73052988492664e-10	6
Tagln2	7.82641968391403e-07	0.535911900744862	0.165	0.103	0.0155737925290205	6
B930036N10Rik3	8.15027065052997e-10	0.535130805632036	0.231	0.143	1.62182235674896e-05	6
Mbd2	2.9946205661384e-12	0.534791538563471	0.228	0.129	5.9589954645588e-08	6
Sppl2a	3.85783056402222e-22	0.531400582456391	0.772	0.585	7.67669703934782e-18	6
Slamf91	1.0586582440877e-12	0.531332201720493	0.246	0.143	2.10662403991011e-08	6
Tyk2	1.64741139650235e-11	0.524467046523114	0.173	0.093	3.27818393790002e-07	6
Lap3	7.69782476982673e-15	0.524308844437783	0.532	0.36	1.53179015094782e-10	6
D17Wsu92e	1.86920726217433e-11	0.523409186823446	0.214	0.123	3.7195355310007e-07	6
Mthfd2	5.06334242592925e-09	0.522844241038443	0.127	0.067	0.000100755450933566	6
Rnpep1	2.10075660873516e-16	0.522160435956686	0.459	0.294	4.18029557572209e-12	6
Tmem243	5.346734348115e-17	0.512304926408437	0.437	0.273	1.0639466679314e-12	6
Arid5a	1.08553384278397e-07	0.510605314702675	0.114	0.062	0.00216010379375581	6
Il1a1	3.36038439351446e-05	0.510593409751659	0.208	0.146	0.668682890465442	6
Ddx24	1.00301906685713e-19	0.509949537375874	0.553	0.351	1.99590764113901e-15	6
Atp5k1	1.88441343392326e-15	0.508697034629966	0.475	0.312	3.7497942921639e-11	6
Wars	4.4530815190993e-06	0.507760991196017	0.129	0.079	0.0886118691485571	6
Lsp11	4.74838075366009e-07	0.506827416583075	0.159	0.098	0.00944880286170821	6
Plxna4os1	5.23532912661992e-11	0.503844686312246	0.233	0.139	1.0417781429061e-06	6
Znhit1	1.00120169213803e-07	0.500147598791062	0.198	0.125	0.00199229124718547	6
Il18	1.64119755154145e-10	0.49991828141605	0.26	0.16	3.26581900781233e-06	6
Tlr12	3.89184454831837e-07	0.499334991711623	0.129	0.075	0.00774438146669873	6
Nucb2	7.77596723283383e-07	0.499165023756723	0.146	0.089	0.015473397196616	6
Faap20	1.88263983931466e-08	0.496770263137982	0.146	0.083	0.000374626501625225	6
Anxa6	1.04379320199172e-10	0.496599285701745	0.152	0.08	2.07704409264333e-06	6
Phlda31	1.19622265819013e-07	0.496557621880062	0.132	0.076	0.00238036346753255	6
Xrn2	7.12459417417873e-17	0.495744091140914	0.435	0.275	1.41772299471983e-12	6
Pfkfb3	1.21259074495924e-10	0.495164894580424	0.263	0.163	2.4129343233944e-06	6
Ccdc25	1.49857180099645e-06	0.493653573262413	0.15	0.094	0.0298200802680284	6
Zcchc2	1.01286623457826e-10	0.493023151124669	0.235	0.141	2.01550252018728e-06	6
Ugcg	1.94543506399039e-11	0.486717191557583	0.253	0.151	3.87122123383447e-07	6
Ubr4	6.52665562049627e-12	0.48603229611703	0.248	0.145	1.29873920192255e-07	6
Exoc41	8.67163994201412e-14	0.485331648098911	0.388	0.249	1.72556963206139e-09	6
Igsf6	2.59208352314043e-08	0.482664197301274	0.207	0.129	0.000515798700269714	6
Dglucy1	5.40614983798997e-09	0.480833782047431	0.169	0.098	0.000107576975626162	6
Ctsc	1.59261797217e-18	0.480739874963499	0.776	0.614	3.16915050282107e-14	6
Rilpl1	7.42381354266176e-11	0.47865601335151	0.346	0.227	1.47726465685426e-06	6
Glipr11	5.48311194207207e-08	0.478337046001783	0.176	0.108	0.00109108444535292	6
Bbx	4.5663951051128e-11	0.477026439717386	0.271	0.166	9.08666961966396e-07	6
Ascc3	3.4304106757766e-12	0.476579579701268	0.307	0.191	6.82617420372786e-08	6
Cmklr11	1.32005794724124e-11	0.475672105246429	0.295	0.185	2.62678330921534e-07	6
Tmem229b	1.68193869274332e-06	0.471720440098247	0.149	0.092	0.0334688980468994	6
Rab20	1.23136523709463e-07	0.470958507810678	0.198	0.126	0.0024502936852946	6
Nrros1	4.79411110162473e-16	0.470273829326693	0.474	0.303	9.53980168112305e-12	6
Xrn1	3.80211989802873e-14	0.468005659821465	0.366	0.228	7.56583838508737e-10	6
Vac14	2.4603123797589e-06	0.467934863661908	0.129	0.078	0.0489577560448223	6
Nfkbie	2.80520672928847e-08	0.463944014794535	0.117	0.062	0.000558208087061112	6
Cops9	9.50212384951314e-15	0.458929878391168	0.526	0.356	1.89082762481462e-10	6
Slamf6	2.7453741943612e-07	0.457130706265246	0.129	0.074	0.00546302010935936	6
Csf2ra1	9.57938674954513e-12	0.456747798993534	0.333	0.211	1.90620216929199e-07	6
Zcchc61	7.36803735011003e-17	0.455273310224201	0.598	0.404	1.4661657522984e-12	6
Grina	6.7700751050143e-17	0.454586075732971	0.453	0.279	1.34717724514679e-12	6
Tmem1401	3.94078182721371e-12	0.452938196243499	0.263	0.156	7.84176175797256e-08	6
Rnf34	1.38446828587453e-09	0.452859897337123	0.183	0.105	2.75495344206174e-05	6
Lgals8	3.14070728573114e-12	0.45140928730794	0.326	0.205	6.2496934278764e-08	6
Cd83	1.18283893179387e-05	0.440640454250094	0.228	0.158	0.235373119037662	6
Gatm1	6.0798054549863e-08	0.439319899007378	0.423	0.31	0.00120982048748772	6
Ppme1	3.5854290280025e-07	0.437427081346853	0.122	0.07	0.00713464522282217	6
Polr2h	9.36557793897897e-08	0.436521887227787	0.15	0.088	0.00186365635407743	6
Sat11	2.5886893434236e-15	0.436454090584329	0.859	0.718	5.15123292447861e-11	6
C3ar11	1.56271335072769e-15	0.435402041574089	0.557	0.379	3.10964329661302e-11	6
Inpp4a	1.76662248125554e-07	0.435168392495536	0.115	0.064	0.0035154020754504	6
Pgd	7.70778417724214e-13	0.434282775811562	0.336	0.21	1.53377197342941e-08	6
Minpp1	2.17699435247012e-08	0.434090856688969	0.193	0.116	0.000433200106198029	6
Atp6v0a2	1.77259327402374e-12	0.433570549515831	0.475	0.324	3.52728335597985e-08	6
Pla2g4a1	1.40937260343264e-14	0.433120601918762	0.449	0.292	2.80451054357061e-10	6
Tor1aip2	7.35495547649043e-14	0.430610222959341	0.307	0.181	1.46356259026683e-09	6
Rtcb1	2.57533247511877e-13	0.430281968778841	0.333	0.206	5.12465409223884e-09	6
Ddit31	9.14041490657244e-07	0.429853658193807	0.191	0.124	0.0181885116225885	6
Plbd2	8.03723759067235e-12	0.429238860542013	0.284	0.171	1.59932990816789e-07	6
Scpep1	2.67199540834203e-09	0.428316021353319	0.271	0.176	5.3170036630598e-05	6
Ndst21	4.35112746498697e-08	0.426088669667597	0.177	0.107	0.000865830854257758	6
Ripk1	1.4266450975085e-09	0.42318846181842	0.245	0.151	2.83888107953217e-05	6
Gtf3c3	1.66698090918309e-06	0.422849629095203	0.134	0.08	0.0331712531118344	6
Rasa4	8.64375101915547e-08	0.422458729357651	0.27	0.183	0.00172002001530175	6
Necap1	1.36336263303827e-05	0.421569606193874	0.143	0.092	0.271295530348284	6
5430427O19Rik	6.58275552408254e-14	0.420642608607313	0.221	0.118	1.30990252173718e-09	6
C5ar11	7.9242561053736e-08	0.419796523549707	0.271	0.185	0.00157684772240829	6
Sdf2l1	1.92710376260496e-12	0.419534259341286	0.532	0.374	3.83474377720762e-08	6
Birc3	5.10288778588851e-08	0.417403508274524	0.129	0.072	0.00101542364051395	6
Eif4e3	5.24571076681925e-07	0.416467058187944	0.117	0.066	0.0104384398548936	6
Nfe2l1	8.65443335754033e-09	0.414624453808248	0.294	0.194	0.000172214569381695	6
Nsun6	1.45423263513057e-05	0.414492172479313	0.152	0.099	0.289377752064632	6
Ginm1	2.44071938799915e-06	0.413526204036779	0.179	0.116	0.0485678751017952	6
Zfp945	6.8963498217118e-07	0.412991906168335	0.195	0.127	0.0137230465102243	6
Eif1a	1.07362479065213e-06	0.412883227505839	0.208	0.138	0.0213640597091867	6
Cebpb1	1.27266428738013e-12	0.410950952743497	0.591	0.43	2.53247466545772e-08	6
Prpf38a	3.13085140773226e-06	0.410870984660063	0.152	0.096	0.0623008121624642	6
Etv6	3.4989237421177e-09	0.408761470982406	0.238	0.15	6.96250835444001e-05	6
Gm267401	6.14886250709014e-08	0.407958929093573	0.218	0.14	0.00122356215028587	6
Cox171	4.067536936721e-10	0.403685403791511	0.353	0.237	8.09399175038111e-06	6
Eif4ebp1	3.49731160052841e-06	0.401315058051737	0.162	0.103	0.0695930035389148	6
Il21r	2.83431708729868e-13	0.401204063154939	0.474	0.317	5.64000757201565e-09	6
Hsd17b12	5.88051695685094e-11	0.400418242192448	0.368	0.244	1.17016406924377e-06	6
Ms4a6d	5.9102093454858e-13	0.397544965889173	0.423	0.276	1.17607255765822e-08	6
Nubp1	7.67710798611149e-06	0.39638576176437	0.148	0.094	0.152766771815632	6
Sumf2	5.26149215834578e-06	0.395525787072166	0.127	0.077	0.104698432458923	6
Sema4d	2.07047887790433e-12	0.395075309885939	0.505	0.345	4.12004591914182e-08	6
Gsdmd	1.63992402335349e-11	0.395000177368722	0.28	0.17	3.26328481407111e-07	6
Uba521	4.55047610908766e-14	0.394657531583943	0.473	0.317	9.05499240947354e-10	6
Rpl381	1.99636904717124e-17	0.393573092154269	0.91	0.809	3.97257476696605e-13	6
Cog8	1.95770667140981e-09	0.393433721616369	0.176	0.1	3.89564050543838e-05	6
Ap2b1	2.42398890872813e-12	0.392466559763248	0.343	0.216	4.82349552947811e-08	6
Ist1	1.21542809845449e-06	0.390437614658204	0.218	0.146	0.0241858037311459	6
Hspa51	1.33665216209379e-18	0.390206670382224	0.897	0.799	2.65980413735044e-14	6
1810022K09Rik1	8.56808537415555e-09	0.386725691014773	0.26	0.166	0.000170496330860321	6
Ube2w	4.81565612866189e-08	0.384711459071532	0.228	0.146	0.000958267413042429	6
Fam111a	3.22290194340068e-10	0.383452527060626	0.395	0.271	6.413252577173e-06	6
Rbms11	1.25741683746218e-06	0.382945418960158	0.198	0.13	0.0250213376486599	6
App	3.28415509622201e-13	0.378509546508686	0.544	0.379	6.53514022597217e-09	6
Aaed11	0.000658727766344132	0.378093862520062	0.197	0.147	1	6
Ncln	6.58191438029002e-09	0.374713596810134	0.243	0.153	0.000130973514253391	6
Ranbp2	5.24281061618394e-09	0.373387907239134	0.439	0.316	0.000104326688451444	6
Mapkapk2	3.48916544249456e-06	0.372465015898764	0.195	0.129	0.0694309031401992	6
Rpl351	3.91904849571124e-12	0.371822394940447	0.75	0.59	7.79851460161581e-08	6
Tmsb10	2.18803329438179e-09	0.369470457956563	0.383	0.266	4.35396745249033e-05	6
Npc21	9.55554017379231e-19	0.368962490022408	0.897	0.769	1.90145693918293e-14	6
Lyn1	7.55067801627371e-19	0.368856730572758	0.892	0.767	1.50250941845831e-14	6
Dcun1d5	1.31404106117346e-09	0.368717422902898	0.347	0.23	2.61481030762907e-05	6
Rps27l1	1.16294054911982e-11	0.368371266861397	0.584	0.428	2.31413539869353e-07	6
Nadk	2.02945666029707e-06	0.367905671776417	0.195	0.129	0.0403841580832514	6
Rbm43	4.35347659782422e-06	0.364430022275422	0.127	0.077	0.0866298308201041	6
Zmiz2	6.62868357763447e-06	0.363780161442854	0.146	0.093	0.131904174511348	6
Atp13a1	3.86661948082702e-08	0.363321416779771	0.186	0.113	0.000769418610489769	6
Sec61g1	4.6386282235543e-12	0.361486339360433	0.595	0.434	9.23040630205069e-08	6
Usp21	1.95540445802542e-09	0.361424516717011	0.245	0.152	3.89105933102479e-05	6
Rap2c	4.17573761033133e-08	0.360652557648008	0.314	0.212	0.000830930027079831	6
Fam129a1	3.43389296805519e-06	0.360503931777362	0.128	0.078	0.0683310361713302	6
Peli1	4.27316187314113e-11	0.35946348774288	0.549	0.392	8.50316481136353e-07	6
Akr1a1	4.59558706979428e-12	0.358907150185064	0.609	0.443	9.14475871018364e-08	6
Svbp1	1.74419392998482e-10	0.358905831137547	0.321	0.208	3.47077150127679e-06	6
Casp1	5.64048875884014e-10	0.358829177619017	0.208	0.123	1.1224008581216e-05	6
Gsap	2.15890007609635e-09	0.357682025449363	0.212	0.128	4.29599526142413e-05	6
March8	1.58560436141862e-05	0.357598504424357	0.146	0.094	0.315519411878691	6
Gtf2h1	7.47853438003663e-07	0.356862833406891	0.152	0.092	0.0148815355628349	6
Slc4a1ap	4.38384114643541e-06	0.356812816398464	0.135	0.083	0.0872340549729183	6
Pgap2	2.47414015116176e-07	0.356275164092822	0.16	0.097	0.00492329148679678	6
CAAA01118383.1	3.92890596242688e-08	0.354619448009805	0.158	0.091	0.000781812997463326	6
Tnfrsf11a	1.29323877583849e-09	0.354426417276835	0.335	0.219	2.57341584004102e-05	6
Trmt1l	3.35916023182306e-07	0.353656396605913	0.267	0.18	0.0066843929453047	6
Lcp2	2.61713845598152e-12	0.352030382835492	0.543	0.377	5.20784381355762e-08	6
Lrrc251	1.86752779643116e-09	0.35173364658901	0.314	0.206	3.71619356211837e-05	6
9530068E07Rik	1.09796230111799e-12	0.351629936722664	0.381	0.242	2.18483518299468e-08	6
Tcirg1	3.54212947287262e-09	0.351577102644361	0.345	0.232	7.04848343806922e-05	6
Larp1	5.49190796569502e-10	0.351231105115493	0.383	0.262	1.09283476609365e-05	6
Trp53inp11	7.11514538972853e-07	0.348057929857529	0.201	0.132	0.0141584278110208	6
Dcxr2	6.80995011675412e-08	0.348041503812403	0.225	0.144	0.0013551119737329	6
Naip2	8.51846358378501e-09	0.347199071401541	0.273	0.176	0.000169508906853738	6
Lcor	2.43151806557756e-08	0.346608345853915	0.226	0.143	0.000483847779869278	6
B3galt5	8.84540213291506e-06	0.345275401854446	0.149	0.095	0.176014657042877	6
Rbm17	9.35226824530147e-06	0.344270075337337	0.186	0.124	0.186100785813254	6
Fndc3a	3.1892285635235e-08	0.343665988514568	0.367	0.257	0.00063462459185554	6
Max	5.3560367097079e-11	0.343071183889593	0.236	0.139	1.06579774486478e-06	6
Lamtor3	2.23721702339055e-07	0.341296105550205	0.267	0.18	0.00445183815484485	6
Xpo6	1.0192117310127e-10	0.34014312833293	0.221	0.128	2.02812942354217e-06	6
Bola21	3.30325805934135e-11	0.33987982706572	0.287	0.177	6.57315321228334e-07	6
Arrb2	2.42436069971430e-10	0.339547016894461	0.64	0.476	4.82423535636148e-06	6
Mpeg1	3.78705164487583e-16	0.335809528877724	0.92	0.822	7.53585406813842e-12	6
Cast	2.75188629879523e-06	0.335404267006578	0.17	0.109	0.0547597854597263	6
Tomm40	4.15288079585929e-10	0.334362913228503	0.236	0.143	8.26381749568039e-06	6
Tlr7	5.20985183433109e-10	0.334146609726182	0.568	0.42	1.03670841651354e-05	6
Zscan29	2.11433364578912e-06	0.333909415501193	0.156	0.098	0.0420731252175578	6
Bcl2l11	3.86675398705838e-12	0.332746142964425	0.288	0.173	7.69445375884747e-08	6
Tbce	3.82438578439471e-06	0.330050271939488	0.141	0.087	0.0761014527236704	6
Rbpj	6.61354443957729e-09	0.329324717687938	0.35	0.237	0.000131602920803148	6
Capza2	8.87643550588453e-21	0.329139226931374	0.932	0.867	1.76632190131596e-16	6
M6pr	3.50094300557139e-10	0.328590393842304	0.539	0.399	6.96652648678651e-06	6
2810474O19Rik	2.74515665571418e-09	0.328284662677041	0.574	0.44	5.46258722920564e-05	6
Dguok	8.95589618953308e-11	0.327993890926125	0.359	0.234	1.78213378275519e-06	6
Orai1	1.38638788294979e-12	0.324000095216654	0.633	0.468	2.7587732482818e-08	6
Srgn	1.75348820212749e-09	0.323762855541799	0.414	0.286	3.4892661734135e-05	6
Rps281	6.28892100117476e-10	0.323464123868328	0.932	0.864	1.25143239002376e-05	6
[truncated: 11,127 more rows]
