# Supplementary material for: Radiation‑Induced Microglial Turnover Elicits a cGAS‑Mediated Interferon Response
Source: Research Square preprint supplement (doi:10.21203/rs.3.rs-8775672/v1), 2026-02-11
Supplement: Supplementary file 3 [file d0184edee5b0d14c1d112a05.xlsx]

## Sheet: Sheet 1 - IR_module_top_feature
IR_module_top_features_table_correctclusters (1)
	Module Number	Genes Ranked	TFs Ranked	Terms Ranked
0	0	Nr3c2, Fggy, 2610035D17Rik, Ap4s1, Dtwd2, Galk2, Prkg1, Rbfox1, Ddit4, Tulp4, Serpinb6a, Atg16l2, Camk2a, Myo1d, Snx12, Snx25, Gm1976, Rabgap1l, Fam120c, Bckdhb, 4930402H24Rik, Gm48614, Gm26778, Prickle1, Arhgap26, 3300002I08Rik, Ppm1e, Abhd17b, Dip2a, Sdc4, Camta1, Gm26917, Sema3c, Zswim5, Fam46a, Mta3, Rapgef4, March2, Lin52, Zhx3, Ispd, Ube2e2, Prkag2, Ehbp1, Map1b, Ttll5, Klc1, Mobp, Bsn, Sh3…	Nr3c2, Camta1, Mta3, Zhx3, Trps1, Hivep2, Tshz2, St18, Pbx1, Nfib, Rfx3, Scaper, Zeb1, Glis3, Crem, Ebf1, Klf9, Nr6a1, Lrrfip2, Rorb, Nfia, Crebl2, Gatad2a, Smarcc2, Npas3, Epas1, Runx1t1, Tada2a, Rest, Ncoa1, Nfe2l1, Satb1, Arid1b, Zbtb46, D630045J12Rik, Yeats4, Ddb2, Aebp2, Zfp207, Zeb2, Lcorl, Zbtb20, Clock, Rbpj, Zmat2, Hivep1, Foxo3, Zzz3, Creb1, Arid4b, Atrx, Gatad1, Lrrfip1, Zfp236, Ubtf, …	chemical synaptic transmission (GO:0007268), anterograde trans-synaptic signaling (GO:0098916), regulation of neurotransmitter receptor activity (GO:0099601), regulation of cation channel activity (GO:2001257), calcium ion transmembrane import into cytosol (GO:0097553), regulation of NMDA receptor activity (GO:2000310), calcium ion transport into cytosol (GO:0060402), long-term synaptic potentiat…
1	1	Ptrhd1, Cd72, Ldha, Mrpl54, H2-T22, Psme1, Odc1, Tmem256, Lamtor2, Lgals3bp, Anxa5, Trappc2l, Llph, Txndc5, Polr2g, Snu13, Snhg9, Cops9, Ccl12, Pla2g16, Ifi207, Gng5, Cox5a, Uba7, Rps6ka4, Rnaseh2c, Rps28, Uqcrq, Prdx1, Ddit3, Fam96b, H2afj, Lsm4, H2-K1, Tor3a, Gapdh, Ccl2, Ndufs7, Baiap2, Chchd7, Tnfaip2, Psmb5, Cnn2, Fis1, Fgr, Cuta, Mrps14, Chchd1, Adap1, Tesk1, Cxcl16, Gadd45g, Drap1, Mrpl36,…	Ddit3, Drap1, Eno1, Nfkbia, Nfkbil1, Zfp105, Zfp622, Srebf2, Nr1h2, Mllt1, Id2, Junb, Phf5a, Batf, Zfp367, Zmat2, Hmg20b, L3mbtl2, Pou2f2, E2f5, Nfe2l1, Sp100, Dr1, Znfx1, Prox1, Zbtb46, Yeats4, Aebp2, Zfp84, Nfic, Hivep1, Zc3h15, Ezh1, Dnajc2, Zfp874b, Zfp771, Ncoa7, Stat1, Zfp202, Zmat3, Mbd2, Cebpz, Zfp36l1, Stat2, Smarcc1, Taf1, Tfb2m, Rest, Gabpa, Nfix, Fos, Zfp106, Nono, Ubtf, Zfp322a, Zbtb…
2	2	Cd63, Lyz2, Rps4x, Hsd17b10, Rpl30, Rps23, Gm10800, Rpl27, Rpl27a, Rpl23a, Rps7, Rpl6, Rpl35a, Rpl22, Rpl31, Ndufs6, Tmem14c, Egln2, Rps25, Fmr1nb, Rps11, Rpl37, Hcst, Ccdc112, Rps13, Klrd1, Gm26881, Rps27a, Myl2, Msr1, Rpl26, Ackr3, Rpl10, Pfdn5, Hspb1, Rpl28, Rpl36a, Pold4, Rpl23, Psmb10, Eef1b2, Ckb, Snapc5, Rpl12, Naalad2, Hist1h2bc, Rpl14, Rpl17, Rps3a1, Sugp1, Rpl29, Rpl11, Rps10, Rpl21, Rp…	Zfp324, Tsc22d3, Atf3, Arnt2, Gtf3a, Plek, D630045J12Rik, Etv1, Thra, Nfix, Smarcd1, Ttf2, Zfp36l1, Tsc22d1, Bhlhb9, Klf13, Zfp322a, Foxo3, Runx1t1, Zfp91, Aff4, Zfp874b, Crebl2, Satb1, Zfp236, Zeb2, Zbtb20, Lrrfip1, Klf2, Ncoa1, Zfp354c, Ncoa4, Pbrm1, Arid4a, Zc3h13, Dr1, Gabpa, E2f5, Zfp248, Fosb, Tfb2m, Zfp217, Zmat1, Zbtb8a, Creb1, Egr2, Rora, Arid1b, Pou2f2, Zfp59, Zfp771, Hif1a, Nfkbiz, Klf…	SRP-dependent cotranslational protein targeting to membrane (GO:0006614), cotranslational protein targeting to membrane (GO:0006613), protein targeting to ER (GO:0045047), cytoplasmic translation (GO:0002181), nuclear-transcribed mRNA catabolic process, nonsense-mediated decay (GO:0000184), nuclear-transcribed mRNA catabolic process (GO:0000956), peptide biosynthetic process (GO:0043043), transla…
3	3	Serf2, Rpl13, Rplp1, Rps3, Park7, Scand1, H2-Q7, Apoe, Wdr83os, Etfb, Trappc1, Nhp2, Polr2f, Spp1, Clec4d, Snrpd2, Fxyd5, Tmsb10, Uqcrh, Rps5, Rpl10a, Nedd8, Rpl13a, Cxcl2, Cybb, Lgals1, Cstb, Rpsa, Snrpg, Tmsb4x, Tceal9, Taf10, Lgals3, Tspo, Sh3bgrl3, Rhoc, Rpl9, Ndufb11, Acod1, Bola2, Ndufb7, Rplp0, Selenoh, Cmpk2, Rps2, Slc7a5, Crip1, Tmem176a, Fmc1, Atp5k, Txn1, Dctn3, Id2, Vcam1, Rps26, Rps1…	Bola2, Id2, Egr1, Drap1, Nfyb, Stat2, Stat1, Fos, Klf2, Nfkbia, Ssrp1, Ezh2, Fosb, Znfx1, Nfic, Klf6, Cbfb, L3mbtl2, Dnmt1, Zfp324, Zfp248, Dnajc2, Bola3, Pbrm1, Lef1, Zbtb41, Atf5, Sp100, Cebpz, Junb, Klf13, Gatad2a, Nfkbiz, Creb1, Zbtb46, Ncoa7, Zfp36l1, Tax1bp1, Aff4, Egr2, Eno1, Nr4a1, Zfp106, Irf7, Zfp771, Hmg20b, Zzz3, Zc3h15, Nono, Rorb, Hopx, Clock, Zbtb20, Zc3h13, Zfp354c, Taf1, Ncoa4, R…	cotranslational protein targeting to membrane (GO:0006613), SRP-dependent cotranslational protein targeting to membrane (GO:0006614), protein targeting to ER (GO:0045047), nuclear-transcribed mRNA catabolic process, nonsense-mediated decay (GO:0000184), cellular protein metabolic process (GO:0044267), cytoplasmic translation (GO:0002181), nuclear-transcribed mRNA catabolic process (GO:0000956), p…
4	4	Igf1, Gpnmb, Egr3, Nr4a1, Cd74, Gm26802, Fosb, Sik1, Ier3, Ccrl2, Klf2, Egr2, Nfkbiz, Egr1, Lgals3, Dusp1, Marcksl1, Socs3, Art3, Fos, Cd83, Atf3, Hmox1, Ccl4, Zfp36, Adamts1, Il1b, Gem, Junb, Ppp1r15a, Tnf, Ccl3, Neat1, Il1a, Tnfaip3, Nabp1, Klf4, Glipr2, Nfkbia, Serpine1, Btg2, AB124611, Taf13, Apoe, Prom1, Gm34921, Gm26881, Cp, Tnfaip2, Gnas, Peg10, Csf1, Plek, Mapkapk2, Rgs1, Klf6, Tlcd2, Snh…	Egr3, Nr4a1, Fosb, Klf2, Egr2, Nfkbiz, Egr1, Fos, Atf3, Junb, Klf4, Nfkbia, Plek, Klf6, Id2, Tsc22d3, Zfp36l1, Batf, Zfp622, Satb1, Bola2, Hif1a, Aff4, Crem, Klf13, Atf5, Zeb2, Zfp91, Zbp1, Nfix, Prox1, Arid4a, Zfp248, Ncoa1, Lrrfip1, Bola3, Foxo3, Zfp217, Arid1b, Zbtb20, Nfia, Pou2f2, Etv1, Zmat3, Stat2, Clock, Nr6a1, Lrrfip2, Rbpj, Nfic, Tada2a, Tsc22d1, Hivep2, Creb1, Arid4b, Zmat1, Pbrm1, Atr…	cellular response to cytokine stimulus (GO:0071345), negative regulation of extrinsic apoptotic signaling pathway (GO:2001237), inflammatory response (GO:0006954), regulation of inflammatory response (GO:0050727), cytokine-mediated signaling pathway (GO:0019221), cellular response to lipopolysaccharide (GO:0071222), positive regulation of ERK1 and ERK2 cascade (GO:0070374), response to lipopolysa…
5	5	Isg15, Cd69, Ifit1, Oas3, Cd40, Isg20, Oasl1, Mir155hg, Cxcl9, Ifit3b, Phf11a, Ccl5, Ms4a4c, Irf7, Rsad2, Clec4e, Ifit3, Cmpk2, Zbp1, Helz2, Cxcl10, Gbp8, Gbp2, Ifi206, Phf11b, Cd74, Iigp1, Marcksl1, Ifi213, Ifit2, Plac8, Cxcl2, Vcam1, Acod1, Trim69, Ms4a7, Cxcl16, Atp10a, Fcgr4, Cybb, Spp1, Ifi204, Ifi207, Clec4d, Axl, Nes, Usp18, Slfn5, Art3, Slc7a11, Slfn9, Ifi209, Mx1, Polr2k, Phf11d, Gbp3, E…	Irf7, Zbp1, Atf5, Sp100, Stat2, Bola2, Znfx1, Stat1, Nr6a1, Bola3, Lef1, St18, Nfkbiz, Egr1, Zfp536, Hopx, Rbpj, Crem, Ebf1, Zbtb46, Lrrfip1, Ttf2, Plek, Nfe2l1, Zfp874b, Hivep2, Tcf19, Rorb, Aebp2, Zeb2, Klf6, Dr1, Zfp248, Yeats4, Hivep1, Tada2a, Zbtb8a, Egr3, E2f8, Nr4a1, Id2, Zfp324, Camta1, Epas1, Klf9, Nono, Thra, Runx1t1, Npas3, Hmg20b, Gtf3a, Foxm1, Klf2, Ncoa7, Mbd2, Arnt2, Klf4, Batf, Nf…	cellular response to type I interferon (GO:0071357), type I interferon signaling pathway (GO:0060337), defense response to virus (GO:0051607), defense response to symbiont (GO:0140546), response to interferon-gamma (GO:0034341), cytokine-mediated signaling pathway (GO:0019221), cellular response to interferon-gamma (GO:0071346), innate immune response (GO:0045087), negative regulation of viral ge…
6	6	Cxcl9, Ttr, Ccl5, Cxcl10, Art3, Rsad2, Acod1, Bola3, Hmgn3, Iigp1, Ifit3, Erbb4, Ifit2, Ifi209, Oasl2, Ppa1, Oas2, Prdx4, Tpst1, Ifi206, Reln, Mx1, Mcm7, Mcm2, 4930523C07Rik, Ms4a7, Il1b, Capn2, Gjc3, Ccne1, Ifi204, Fen1, Polr2m, Kntc1, Ttc27, Ifit3b, Pdgfrb, Plxnc1, Ranbp1, Clec4e, Cmpk2, Trappc6a, Ube2t, Oas3, Trim69, Ms4a4c, Hdgf, March2, Lsm5, Cspg5, Tceal9, Trp53i11, Atp10a, Cldn11, Cisd2, N…	Bola3, Atf5, Nono, Hivep1, Camta1, Rest, Hopx, Ncoa7, Irf7, Bola2, Mbd2, Hivep2, Stat1, Pbx1, Gatad2a, Zbp1, Znfx1, Zfp536, Dr1, Zeb1, St18, Tfdp1, Phtf1, Fosb, Zfp59, Runx1t1, Lef1, Tcf19, Scaper, Ssrp1, E2f8, Rbpj, Nr3c2, Arid1b, Tada2a, Lrrfip1, Npas3, Taf1, Zfp874b, Nfib, Zfp236, Ubtf, Zeb2, Ttf2, Mta3, Ncoa1, Arnt2, Egr3, Zfp84, Foxm1, Zfp354c, Ncoa4, Atf3, Etv1, Cbfb, Rfx3, Klf9, Nr6a1, Sma…	cellular response to type I interferon (GO:0071357), type I interferon signaling pathway (GO:0060337), defense response to virus (GO:0051607), defense response to symbiont (GO:0140546), negative regulation of viral genome replication (GO:0045071), response to interleukin-1 (GO:0070555), regulation of viral genome replication (GO:0045069), cellular response to interferon-gamma (GO:0071346), negati…
7	7	Cdca7l, Dscc1, Dhfr, Mcm2, Dut, Gmnn, Hells, Pole, Uhrf1, Mcm7, Mcm5, Mcm6, Dtl, Lig1, Fen1, Dctpp1, Timeless, Syce2, Chaf1a, Tcf19, Mcm4, Rad54b, Cenpk, Bola3, Pcp4, Rfc4, Pask, Rad51ap1, Prim1, Kntc1, Pcna, Zranb3, Gemin6, Cenph, Rpa3, Ccne2, Pmf1, Mcm3, Elof1, Rad51, Cdca7, Ppa1, Polr2m, Cenpm, Prim2, Rfc3, Sod1, Ndrg1, Dnmt1, 1810037I17Rik, Tyms, Tipin, Brca2, Cbx5, Clspn, Tk1, Sh3rf1, Rrm1, …	Tcf19, Bola3, Dnmt1, Zfp367, Zhx3, Brca1, Ssrp1, Gtf3a, Tfdp1, Ezh2, Zbtb8a, Mybl1, Phf5a, Tada2a, Zbp1, Ttf2, Zfp202, Mta3, Zfp354c, Bola2, Zfp324, Ddb2, Zbtb41, Bhlhb9, Nfib, Phtf1, Nfic, D630045J12Rik, Arnt2, Smarcc1, Zeb1, Cbfb, Glis3, Zmat1, Clock, Smarcc2, Rfx3, Hif1a, Atrx, Nr4a1, Zzz3, Taf1, Lrrfip2, Thra, Hmg20b, Nfia, Lcorl, Hivep2, Zc3h15, Ubtf, Gatad1, Ncoa4, Mllt1, Camta1, Pbrm1, Zfp…	DNA metabolic process (GO:0006259), DNA replication (GO:0006260), DNA replication initiation (GO:0006270), DNA-dependent DNA replication (GO:0006261), DNA strand elongation involved in DNA replication (GO:0006271), double-strand break repair via homologous recombination (GO:0000724), DNA repair (GO:0006281), cellular macromolecule biosynthetic process (GO:0034645), base-excision repair, gap-filli…
8	8	Ccne1, Ccne2, Rad51, Pask, Kntc1, Tcf19, Atp10a, Dtl, Brip1, Fsd1l, Clspn, Pclaf, Pole, Brca1, Rfc4, Uhrf1, Pcna, Pitpnm2, Syne2, Cenph, Tyms, Fen1, Atad2, Traip, Chaf1a, Prim1, Pola1, Atad5, Rad54b, Lig1, Ncapg2, Haus8, Cenpp, Csrp1, Ildr2, Tk1, Slc20a1, E2f8, Arhgef10, Cobll1, Dhfr, Cenpm, Pde8a, Rrm2, Gjc1, Lrr1, Dscc1, Lrrc8b, Asf1b, Nup210, Hells, Tipin, Cdca7l, Mcm7, Spc24, Arl2bp, Tfdp1, Z…	Tcf19, Brca1, E2f8, Tfdp1, Mybl1, Zfp367, Dnmt1, Zbtb8a, Ncoa7, Ezh2, Ssrp1, Atf5, Mbd2, Gatad2a, Smarcc1, Nono, Gatad1, Camta1, Cbfb, Tada2a, Dnajc2, Taf1, Smarcc2, Nr4a1, Aebp2, Rfx3, Ddb2, Bola2, Smarcd1, Tsc22d1, Bhlhb9, E2f5, Zfp354c, Zfp207, Gtf3a, Mllt1, Yeats4, Phf5a, D630045J12Rik, Scaper, Nfyb, Ttf2, Lrrfip1, Klf13, Atrx, Foxm1, Zbtb20, Npas3, Zc3h13, Ubtf, Zmat2, Nfia, Hopx, Lef1, Zeb1…	DNA metabolic process (GO:0006259), DNA replication (GO:0006260), regulation of transcription involved in G1/S transition of mitotic cell cycle (GO:0000083), G1/S transition of mitotic cell cycle (GO:0000082), DNA repair (GO:0006281), DNA strand elongation involved in DNA replication (GO:0006271), cellular response to DNA damage stimulus (GO:0006974), DNA-dependent DNA replication maintenance of …
9	9	Lockd, Kif4, Esco2, Neil3, Cdca3, Shcbp1, Ska1, Knstrn, Kif23, Kif15, Ccna2, Kif11, Melk, Cdca2, Nusap1, Ncapg, Pbk, Foxm1, Ndc80, Mastl, Mis18bp1, Iqgap3, Kif22, Pimreg, Spc25, Polq, Knl1, Ccdc18, E2f8, Mns1, Gen1, Prr11, Aurkb, Racgap1, Diaph3, Bub1, Nuf2, Rrm2, Mybl1, Top2a, Tpx2, Sgo2a, Gtse1, Stil, Ckap2l, Cdca8, Anln, Cdkn2c, C330027C09Rik, Incenp, Cit, Sgo1, Ube2c, Eme1, Asf1b, Hmgn2, Trip…	Foxm1, E2f8, Mybl1, Atf5, Brca1, Ezh2, Ttf2, Lcorl, L3mbtl2, Nfyb, Zfp91, Bola3, Cbfb, Id2, Tcf19, Dnmt1, Taf1, Zfp367, Mllt1, Ebf1, E2f5, Phtf1, Mbd2, Zfp354c, Pbrm1, Rbpj, Hmg20b, Zbtb41, Nr6a1, Zfp622, Nfic, Smarcc2, Zc3h15, Ncoa4, Creb1, Zmat2, Nfia, Crem, Nfkbil1, Zmat1, Dr1, Gabpa, Bola2, Arid1b, Zbp1, Stat2, Zfp236, Clock, Zzz3, Lrrfip2, Zfp217, Glis3, Nfix, Smarcc1, Zfp536, Ssrp1, Gatad2a…	microtubule cytoskeleton organization involved in mitosis (GO:1902850), mitotic spindle organization (GO:0007052), regulation of cell cycle process (GO:0010564), mitotic sister chromatid segregation (GO:0000070), regulation of cytokinesis (GO:0032465), sister chromatid segregation (GO:0000819), positive regulation of cell cycle process (GO:0090068), cytoskeleton-dependent cytokinesis (GO:0061640)…
10	10	Cdc20, Ccnb1, Gzma, Aspm, Cdc25b, Cenpa, Vim, Cenpf, Tubb4b, Kif20a, Aurka, Psrc1, Plk1, Cenpe, Cep55, Ccnb2, Hmmr, Kpna2, Cdkn3, Tacc3, Ckap2, Ifi27l2a, Anln, Dlgap5, Gas2l3, Prc1, Ube2c, Cdk1, Kif2c, Sh3bgrl, Birc5, Arhgap6, Kif20b, Mki67, Plac8, Cks2, Bub1b, Tuba1c, Pimreg, C330027C09Rik, Cdca8, Sgo1, Trim59, Med21, Sgo2a, Ckap2l, Prr11, Tpx2, Fmc1, Kif22, Stil, Tmsb10, Gtse1, Kif18a, Acot11, …	Bola3, Foxm1, Ezh2, Zbp1, Irf7, Atf5, Epas1, Zmat3, Gtf3a, L3mbtl2, Eno1, Ebf1, Sp100, Zfp106, Tax1bp1, Drap1, Zfp248, Fosb, Zfp771, E2f8, Zfp324, Klf6, Lef1, Nfkbiz, Stat2, Arid4b, Zfp59, Zfp207, Egr1, Klf2, Cbfb, Lrrfip1, Zc3h13, Zfp322a, Zfp91, Arid4a, Klf9, Atf3, Foxo3, Zeb2, Crebl2, Tsc22d3, Atrx, Dnajc2, Aff4, Stat1, Gabpa, Zfp36l1, Lcorl, Hmg20b, Znfx1, Hivep1, Smarcd1, Nr4a1, Brca1, Zbtb4…	mitotic spindle organization (GO:0007052), microtubule cytoskeleton organization involved in mitosis (GO:1902850), mitotic sister chromatid segregation (GO:0000070), regulation of cell cycle process (GO:0010564), mitotic metaphase plate congression (GO:0007080), regulation of cytokinesis (GO:0032465), cytoskeleton-dependent cytokinesis (GO:0061640), mitotic cell cycle phase transition (GO:0044772…
11	11	Ms4a4b, Crip1, Colec12, Pak7, Ephb1, Trim69, Mir155hg, Reln, Gng11, Oas3, Gria3, Slc7a11, Sez6l2, Tek, Plxnc1, Erbb4, Gnai1, Gzma, Gjc3, Hmcn1, Wwtr1, Cacnb4, Flt1, Adgrf5, Atf5, Itga4, Itga1, Cxcl9, Palmd, Efr3b, Gpnmb, Arhgap6, Pdgfrb, Shtn1, Prom1, Atp13a5, Ebf1, Ptprb, Ugt8a, Clic5, Clec4e, Isg20, Trappc6a, Arhgef10, Jcad, Cmpk2, Slco1a4, Ddr1, Mfge8, Lef1, Alcam, Zfp536, Garem1, Cldn11, Plcb…	Atf5, Ebf1, Lef1, Zfp536, Hopx, Zbp1, St18, Epas1, Irf7, Tshz2, E2f8, Npas3, Bola3, Bola2, Klf9, Mybl1, Egr1, Rorb, Trps1, Arnt2, Foxm1, Runx1t1, Nr4a1, Zbtb8a, Crem, Zfp248, Brca1, Tsc22d1, Ncoa4, Aebp2, Gatad1, Tada2a, Nr3c2, Nfib, Crebl2, E2f5, Zmat3, Tfdp1, Zhx3, Zfp322a, Gtf3a, Zfp59, Egr3, Thra, Pbx1, Zbtb46, Camta1, Zfp354c, Ddb2, Rora, Ttf2, Fosb, D630045J12Rik, Zfp202, Satb1, L3mbtl2, Zf…	regulation of kinase activity (GO:0043549), positive regulation of kinase activity (GO:0033674), peptidyl-tyrosine phosphorylation (GO:0018108), positive regulation of MAPK cascade (GO:0043410), enzyme linked receptor protein signaling pathway (GO:0007167), positive regulation of ERK1 and ERK2 cascade (GO:0070374), regulation of ERK1 and ERK2 cascade (GO:0070372), peptidyl-tyrosine modification (…
12	12	Pdgfrb, Pltp, Heg1, Slco1a4, Col4a1, Tek, Spock2, Flt1, Adgrl4, Hmcn1, Pde4b, Ptprb, Efr3b, Colec12, Ptprg, Cp, Lef1, Itga1, Ms4a4b, Ebf1, Gjc1, Hip1, Atp10a, Atp13a5, Trim69, Clic5, Gng11, Cxcl12, Prom1, Ccdc141, Crip1, Plxna2, Igfbp7, Samd12, Pcp4, Clec4d, Cacnb4, Gjc3, Nxpe4, Reln, Plcb4, Sorbs2, Pitpnm2, Fn1, Nwd1, Phlpp1, Cxcl9, Abcb1a, Itga4, Hmgn3, Slco1c1, Hspb1, Fat1, Mast4, Epas1, Tshz2…	Lef1, Ebf1, Epas1, Tshz2, Rorb, Ncoa4, Runx1t1, Tsc22d1, Bola2, Npas3, Pbx1, Zfp536, Hopx, Bola3, Klf9, Foxm1, E2f8, Atf5, Mybl1, Arnt2, Hivep2, Zbp1, Crem, St18, Zbtb8a, Trps1, Brca1, Tcf19, Nr3c2, Nr4a1, Tada2a, Satb1, Nfib, Ddb2, Zbtb41, Ezh2, Phtf1, Irf7, Zmat1, Egr1, Zfp771, Zfp354c, Drap1, Zbtb46, Gtf3a, Rora, L3mbtl2, Tfb2m, Zfp248, Zc3h15, Nono, Crebl2, Aebp2, Zfp322a, Prox1, Thra, Egr3, …	cell morphogenesis involved in differentiation (GO:0000904), substrate adhesion-dependent cell spreading (GO:0034446), extracellular matrix organization (GO:0030198), regulation of MAPK cascade (GO:0043408), external encapsulating structure organization (GO:0045229), extracellular structure organization (GO:0043062), endoderm formation (GO:0001706), cell junction assembly (GO:0034329), peptidyl-t…
13	13	Mal, Ndrg1, Car2, Fut9, Sept4, Gng11, Vtn, Ttr, Hepacam, Fa2h, Ptgds, Mt2, Cxcl12, Apod, Nwd1, Ms4a4b, Hopx, Prom1, Ephb1, Adgrl4, Ddr1, Gnai1, Aldoc, Fez1, Ddah1, Tek, Abcb1a, Slco1a4, Grb14, Ntm, Fam13c, Sez6l2, Erbb4, Slco1c1, Lef1, Dixdc1, Ptn, Itga1, Npas3, Grik2, Prdx6, Gjc1, Tmtc2, Igfbp7, Cspg5, Mfge8, Fn1, Limch1, Gpc5, Mt1, Flt1, Pak7, Gria2, Kif21a, Ttll7, Zfp536, Adgrf5, Adgrb3, Enpp2…	Hopx, Lef1, Npas3, Zfp536, Epas1, Rorb, Nfib, Ebf1, Klf9, Tshz2, St18, Rora, Thra, Foxm1, Arnt2, Trps1, Tsc22d1, Zbp1, E2f8, Tcf19, Bola2, Brca1, Dnmt1, Id2, Srebf2, Zfp771, Bola3, Irf7, E2f5, Zbtb8a, Nfyb, Mybl1, Runx1t1, Zfp354c, Prox1, Tfdp1, Ssrp1, Satb1, Zbtb20, Zmat3, Klf13, Zbtb46, Ezh2, Ncoa1, Stat1, Atf5, Gtf3a, Tsc22d3, Zfp874b, Nr4a1, Hmg20b, Nfix, Klf4, Clock, Ttf2, Klf2, Tada2a, Zzz3…	external encapsulating structure organization (GO:0045229), extracellular structure organization (GO:0043062), nervous system development (GO:0007399), extracellular matrix organization (GO:0030198), cell junction assembly (GO:0034329), cell-matrix adhesion (GO:0007160), substrate adhesion-dependent cell spreading (GO:0034446), positive regulation of cell junction assembly (GO:1901890), enzyme li…
14	14	Reln, Mir155hg, Trim69, Cacnb4, Slc7a11, Clec4e, Arhgap6, Ms4a4b, Garem1, Trappc6a, Zfp536, Ephb1, Acod1, Gjc3, Oas3, Gpnmb, Prom1, Sez6l2, Colec12, Tek, Gnai1, Ddr1, Pak7, Erbb4, Gbp8, Ptprk, Fa2h, Nwd1, Shtn1, Palmd, Arhgap15, Plxnc1, Tmtc2, Clic5, Samd12, Lef1, Dixdc1, Helz2, Tmeff1, 1500011K16Rik, Igf1, Plxna2, Frmd5, Sik1, Hepacam, Fam13c, Ttll7, Alcam, Itga1, Pdgfrb, Clec4d, Ndrg1, Vav3, St…	Zfp536, Lef1, St18, Ebf1, Hopx, Atf5, Tshz2, Bola2, Zbp1, Rorb, Npas3, Arnt2, Runx1t1, Epas1, Zbtb8a, Klf9, Zhx3, Trps1, Tada2a, Bola3, Egr1, Foxm1, Crem, Camta1, Zfp248, Crebl2, Mybl1, Irf7, Zfp354c, Batf, Mta3, Egr3, Nfib, D630045J12Rik, Satb1, Nr4a1, Zbtb46, Nr3c2, Zfp59, Ncoa4, Egr2, Gatad1, Thra, L3mbtl2, Tsc22d1, Zfp202, Tfb2m, Zfp874b, E2f5, Pbx1, Zfp322a, Tfdp1, Nr6a1, Ddb2, Aebp2, E2f8, …	regulation of kinase activity (GO:0043549)
